30 **Abstract:**

31 Meiotic drivers are parasitic loci that force their own transmission into greater than half of the  
32 offspring of a heterozygote. Many drivers have been identified, but their molecular mechanisms  
33 are largely unknown. The *wtf4* gene is a meiotic driver in *Schizosaccharomyces pombe* that  
34 uses a poison-antidote mechanism. Here, we show that the Wtf4 proteins can function outside  
35 of gametogenesis and in a distantly related species, *Saccharomyces cerevisiae*. The Wtf4<sup>poison</sup>  
36 protein forms dispersed, toxic aggregates. The similar Wtf4<sup>antidote</sup> protein also forms aggregates  
37 but is sequestered within or near vacuoles and is mostly benign. The Wtf4<sup>antidote</sup> can co-  
38 assemble with the Wtf4<sup>poison</sup> and promote its trafficking to vacuoles. We show that neutralization  
39 of the Wtf4<sup>poison</sup> requires both co-assembly with the Wtf4<sup>antidote</sup> and aggregate sequestration, as  
40 mutations that disrupt either of these processes results in cell death. This work reveals that *wtf*  
41 parasites can exploit protein aggregate management pathways to selectively destroy gametes.

42

43 **Introduction**

44 Meiotic drivers are selfish DNA sequences that break the traditional rules of sexual  
45 reproduction. Whereas most alleles have a 50% chance of being transmitted into a given  
46 offspring, meiotic drivers can manipulate gametogenesis to bias their own transmission into  
47 most or even all of an individual's offspring (*Burt and Trivers, 2006; Lindholm et al., 2016*). This  
48 makes meiotic drive a powerful evolutionary force (*Sandler et al., 1957*). Meiotic drivers are  
49 widespread in eukaryotes and the evolutionary pressures they exert are thought to shape major  
50 facets of gametogenesis including recombination landscapes and chromosome structure (*Crow,*  
51 *1991; Dyer et al., 2007; Larracuente and Presgraves, 2012; Schimenti, 2000; Pardo-Manuel de*  
52 *Villena and Sapienza, 2001; Hammer et al., 1989; C. Grey et al., 2018*).

53

54 Harnessing and wielding the evolutionary power of meiotic drive has the potential to greatly  
55 benefit humanity. Engineered drive systems, known as 'gene drives,' are being developed to  
56 spread genetic traits in populations (*Lindholm et al., 2016; Burt, 2014; Gantz et al., 2015; Esvelt*  
57 *et al., 2014; Burt and Crisanti, 2018*). For example, gene drives could be used to spread  
58 disease resistance alleles in crops. Alternatively, gene drives can be used to suppress human  
59 disease vectors, such as mosquitoes, or to limit their ability to transmit diseases (*Lindholm et*  
60 *al., 2016; Burt, 2014; Gantz et al., 2015; Esvelt et al., 2014*, reviewed in *Burt and Crisanti,*  
61 *2018*). While there are many challenges involved in designing effective gene drives, natural  
62 meiotic drivers could serve as useful models or components for these systems (*Lindholm et al.,*

63 2016; Burt, 2014). However, the molecular mechanisms employed by most meiotic drivers are  
64 unknown.

65  
66 The recently characterized *wtf* gene family of *Schizosaccharomyces pombe* includes several  
67 meiotic drivers (Nuckolls et al., 2017; Hu et al., 2017; López Hernández and Zanders, 2018;  
68 Bravo Núñez et al., 2018; Bravo Núñez et al., 2020; Eickbush et al., 2019). The *wtf* coding  
69 sequences are small (~1 kb) and encode autonomous drivers that specifically kill meiotic  
70 products (spores) that do not inherit the *wtf*<sup>+</sup> allele from *wtf*<sup>+</sup>/*wtf*<sup>-</sup> heterozygotes. These drivers  
71 carry out targeted spore destruction using two proteins: a poison (Wtf<sup>poison</sup>) to which all spores  
72 are exposed, and an antidote (Wtf<sup>antidote</sup>) which rescues only the spores that inherit the *wtf*<sup>+</sup>  
73 allele (Figure 1A and 1B). The two proteins of a given driver are encoded on largely overlapping  
74 coding sequences, but the antidote contains ~45 additional N-terminal amino acids (Figure 1A).  
75 The small size and autonomy of the *wtf* drivers make them promising candidates for use in gene  
76 drive systems. It is important, however, to first understand more about the molecular  
77 mechanisms of the *wtf* proteins and whether they are likely to be functional in other species.

78  
79 Here, we investigate the mechanisms of *wtf* drive using the *wtf4* allele as a model. We  
80 demonstrate that the Wtf4 proteins are functional outside of gametogenesis and in the budding  
81 yeast *Saccharomyces cerevisiae*, despite over 350 million years since the two yeasts shared a  
82 common ancestor (Hoffman et al., 2015). We also show that the two Wtf4 proteins assemble  
83 into distinct aggregated forms. Wtf4<sup>poison</sup> forms small, toxic aggregates that are dispersed  
84 throughout the cytoplasm. The Wtf4<sup>antidote</sup> forms aggregates that are recruited to vacuole-  
85 associated inclusions and are largely non-toxic. When the two Wtf4 proteins are expressed  
86 together, the Wtf4<sup>antidote</sup> sequesters Wtf4<sup>poison</sup> into vacuole-associated aggregates. This work  
87 adds to our understanding of how *wtf* meiotic drivers work. In addition, the conserved function of  
88 Wtf4<sup>poison</sup>'s toxicity and the fact that the Wtf4<sup>antidote</sup> exploits conserved aggregate management  
89 processes suggests that *wtf* genes represent good candidates for gene drive systems.

90

## 91 **Results**

### 92 **Wtf4 proteins localize to the vacuole and endoplasmic reticulum within *S. pombe* spores**

93 The *wtf4* meiotic driver used in this work is from *S. kambucha*, an isolate that is almost identical  
94 (99.5% DNA sequence identity) to the commonly studied lab isolate of *S. pombe* (Rhind et al.,  
95 2011; Singh and Klar, 2002). Our previous work demonstrated that the Wtf4<sup>antidote</sup> localizes to a  
96 region within the spores that inherit the *wtf4* gene. The Wtf4<sup>poison</sup> protein, however, is found in all

97 four spores and throughout the sac (ascus) that holds them (*Nuckolls et al., 2017*). We explored  
98 the localization of these proteins in greater depth to gain insight into their mechanisms.

99

100 We used fluorescently tagged alleles of *wtf4* to visualize the proteins. The two *Wtf4* proteins  
101 have different translational start sites and thus different N-termini (Figure 1A, Figure 1-figure  
102 supplement 1A). We took advantage of this feature to visualize the proteins separately. For the  
103 *Wtf4<sup>antidote</sup>*, we used an allele with an mCherry tag immediately upstream of the first start codon.  
104 This *mCherry-wtf4* allele tags only the *Wtf4<sup>antidote</sup>* (*mCherry-Wtf4<sup>antidote</sup>*) but still encodes an  
105 untagged *Wtf4<sup>poison</sup>*. We previously demonstrated that this allele is fully functional (*Nuckolls et*  
106 *al., 2017*). To visualize *Wtf4<sup>poison</sup>*, we used the *wtf4<sup>poison</sup>-GFP* allele. This separation-of-function  
107 allele encodes only a C-terminally tagged poison, but no *Wtf4<sup>antidote</sup>* protein. We previously  
108 demonstrated that this tagged allele is functional but has a slightly weaker phenotype than an  
109 untagged *wtf4<sup>poison</sup>* separation-of-function allele (*Nuckolls et al., 2017*).

110

111 We integrated the tagged alleles at the *ade6* locus in separate haploid *S. pombe* strains. We  
112 then crossed those two haploid strains to create heterozygous *mCherry-wtf4/wtf4<sup>poison</sup>-GFP*  
113 diploids and induced these diploids to undergo meiosis. We imaged the asci using both  
114 standard and time-lapse fluorescence microscopy (Figure 1C, Figure 1-figure supplement 1B).  
115 We confirmed our previous observations that the *mCherry-Wtf4<sup>antidote</sup>* was enriched in two  
116 spores, whereas *Wtf4<sup>poison</sup>-GFP* was found throughout the ascus and often formed irregularly  
117 sized puncta. In the spores that did not inherit the antidote, *Wtf4<sup>poison</sup>-GFP* appeared dispersed  
118 throughout the spores. In the spores that inherited and thus expressed *mCherry-wtf4*, however,  
119 the localization of *Wtf4<sup>poison</sup>-GFP* was more restricted. Specifically, we observed that the  
120 *Wtf4<sup>poison</sup>-GFP* largely colocalized with *mCherry-Wtf4<sup>antidote</sup>* in a limited region of the spore  
121 (Figure 1C). The *Wtf4* proteins also co-diffused throughout the spore, suggesting the two  
122 proteins are either physically interacting or are in the same compartment (Figure 1-figure  
123 supplement 1B). It also appeared that the level of *Wtf4<sup>poison</sup>-GFP* protein is reduced in spores  
124 containing the antidote. We did not distinguish if this was due to technical reasons (i.e.  
125 quenching of the GFP molecules) or biological reasons such as degradation of *Wtf4<sup>poison</sup>-GFP* in  
126 spores with *mCherry-Wtf4<sup>antidote</sup>* and/or due to a higher expression of *Wtf4<sup>poison</sup>-GFP* in the  
127 spores that inherit it (non-antidote spores) (Figure 1C). We completed Pearson correlation  
128 analysis (*Adler and Parmryd, 2010*) of *mCherry-Wtf4<sup>antidote</sup>* and *Wtf4<sup>poison</sup>-GFP* in the spores  
129 (where a result of >0 is positive correlation; 0, no correlation; <0 negative correlation) and



130 obtained a coefficient of 0.61, indicating strong colocalization between the two Wtf4 proteins  
131 (Figure 1-figure supplement 1C).

132

133 The limited distribution of the Wtf4 poison and antidote proteins within *wtf4*<sup>+</sup> spores suggested  
134 they may be confined to a specific cellular compartment. To test this, we looked for  
135 colocalization of Wtf4 proteins with the vacuole, endoplasmic reticulum (ER) and nucleus (see  
136 below). For these experiments, we used the fully functional *wtf4-GFP* allele, which tags both the  
137 poison and antidote proteins (Nuckolls *et al.*, 2017).

138

139 To assay the localization of the Wtf4 proteins relative to the vacuole, we imaged asci produced  
140 by diploids that were heterozygous for both *wtf4-GFP* and *cpy1-mCherry*. Cpy1-mCherry  
141 localizes to the lumen of the vacuole in vegetative cells (Sun *et al.*, 2013), but has not, to our  
142 knowledge, been imaged in spores. We could observe mCherry in two of the four spores—  
143 presumably the two that inherited the *cpy1-mCherry* allele. This 2:2 spore localization pattern  
144 has been previously observed in budding yeast for vacuolar proteins and several other  
145 organelles (Neiman, 2011; Roeder and Shaw, 1996; Suda *et al.*, 2007). We found that the Wtf4-  
146 GFP and Cpy1-mCherry proteins colocalized within the spores that inherited both tagged  
147 alleles, suggesting the Wtf4 proteins are within the vacuole (Pearson coefficient of 0.89, Figure  
148 1D, Figure 1-figure supplement 2A-B).

149

150 Interestingly, we also saw colocalization of Wtf4-GFP proteins with an ER marker, pbip1-  
151 mCherry-AHDL (Zhang *et al.*, 2012) in the spores generated by diploids heterozygous for alleles  
152 encoding those tagged proteins (Pearson coefficient of 0.74, Figure 1-figure supplement 2C-D).  
153 However, we observed no colocalization of the Wtf4 proteins with the cortical ER. Due to the  
154 colocalization of Wtf4 with both organelles, we reasoned that the organelles themselves must  
155 colocalize in spores. This organelle colocalization could be due to nitrogen starvation, which is  
156 required to induce meiosis and promotes organelle autophagy in *S. pombe* (Zhao *et al.*, 2016;  
157 Kohda *et al.*, 2007).

158

159 **Wtf4<sup>antidote</sup> localizes to the vacuole when expression is induced in vegetatively growing *S.***  
160 ***pombe* cells**

161 Because we could not distinguish the vacuole and ER within spores, we assayed the  
162 localization of the Wtf4 proteins in the absence of nitrogen starvation. To do this, we  
163 fluorescently-tagged the coding sequence of *wtf4<sup>poison</sup>* (*wtf4<sup>poison</sup>-GFP*) and *wtf4<sup>antidote</sup>* (*wtf4<sup>antidote</sup>-*

164 *mCherry*) separation-of-function alleles under the control of  $\beta$ -estradiol-inducible promoters  
165 (Ohira *et al.*, 2017). We then integrated the *wtf4<sup>poison</sup>-GFP* allele at the *ura4* locus and the  
166 *wtf4<sup>antidote</sup>-mCherry* allele at the *lys4* locus of the same haploid strain. Next, we observed the  
167 localization of the Wtf proteins relative to vacuole (visualized using the CellTracker Blue CMAC  
168 lumen stain) or the ER (using Sec63-YFP) following  $\beta$ -estradiol induction. Similar to our  
169 observations in spores, we saw that the Wtf4<sup>poison</sup>-GFP and Wtf4<sup>antidote</sup>-mCherry proteins largely  
170 colocalized, with a Pearson coefficient of 0.68 (Figure 1E, Figure1-figure supplement 3D-E).  
171 However, there were Wtf4<sup>poison</sup>-GFP puncta that lined the periphery of the cell and a circle in the  
172 middle of the cell, reminiscent of ER localization. These puncta were devoid of Wtf4<sup>antidote</sup>-  
173 mCherry (Figure 1E arrow, Figure1-figure supplement 3D). We also found that the Wtf4 proteins  
174 colocalized with the CMAC stain (Figure 1E), which suggests that the Wtf4 poison and antidote  
175 proteins are largely within the vacuole.

176  
177 We also attempted to assay the localization of the Wtf4 antidote and poison proteins individually  
178 to test if the localization of the Wtf4<sup>poison</sup> was altered in the presence of the Wtf4<sup>antidote</sup>, as we  
179 observed in spores (Figure 1C). We found that the localization of the Wtf4<sup>antidote</sup>-mCherry to the  
180 vacuole was similar in the absence of the Wtf4<sup>poison</sup> (Figure 1F, Figure1-figure supplement 3B),  
181 with a Pearson coefficient of 0.69 (Figure1-figure supplement 3C). This is analogous to previous  
182 observations of the localization of the slightly different (82.2% amino acid identity) Wtf4<sup>antidote</sup>  
183 protein found in the *S. pombe* lab strain (Matsuyama *et al.*, 2010). We failed, however, to  
184 generate cells carrying the *wtf4<sup>poison</sup>-GFP* allele without the *wtf4<sup>antidote</sup>-mCherry* allele by  
185 transformation or by crossing the strain carrying both *wtf4<sup>poison</sup>-GFP* and *wtf4<sup>antidote</sup>-mCherry* to a  
186 wild-type strain (Figure1-figure supplement 3A). This is likely due to leaky expression of the  
187 *wtf4<sup>poison</sup>-GFP* from the inducible promoter even without addition of  $\beta$ -estradiol. Overall, our  
188 results suggest that the Wtf4<sup>poison</sup> protein is toxic in vegetative cells, but the antidote is still  
189 capable of neutralizing the poison, as we could obtain cells carrying both the Wtf4 poison and  
190 antidote proteins.

191

### 192 ***S. pombe* spores destroyed by *wtf4* display nuclear condensation followed by nuclear** 193 **fragmentation**

194 In the process of trying to understand the Wtf4 proteins' localization patterns, we assayed the  
195 localization of the Wtf4 proteins relative to the nucleus. For this experiment, we imaged asci  
196 produced by *wtf4-GFP/ade6<sup>+</sup>* heterozygotes also carrying a tagged histone allele, *hht1-RFP*  
197 (Tomita and Cooper, 2017). Although we did not observe colocalization of Wtf4 proteins and the

198 nucleus, we frequently (24/38 asci) observed that the nuclei in the *wtf4<sup>-</sup>* spores appeared more  
199 condensed (Figure 1G (younger ascus), see methods). Additionally, in 11 out of 38 asci, one or  
200 both of the nuclei in the *wtf4<sup>-</sup>* spores were disrupted and the nuclear contents were dispersed  
201 throughout the spores (Figure 1G (older ascus)). To address the timing of these nuclear  
202 phenotypes, we imaged diploids undergoing gametogenesis using time-lapse microscopy. We  
203 saw that all four nuclei tended to look similar shortly after the second meiotic division. As spores  
204 matured, however, we observed nuclear condensation sometimes followed by fragmentation in  
205 the spores that did not inherit *wtf4* (*i.e.* in spores lacking the enriched GFP expression and  
206 antidote function) (Figure 1-figure supplement 4A-B). This nuclear condensation and  
207 fragmentation are reminiscent of apoptotic cell death (*Kerr et al., 1972; Carmona-Gutierrez et*  
208 *al., 2010*).

209

### 210 **Wtf4 proteins function in the budding yeast, *Saccharomyces cerevisiae***

211 Our experiments in *S. pombe* suggest that the Wtf4 proteins can act when expressed outside of  
212 gametogenesis. Our inability to induce expression of the Wtf4<sup>poison</sup> in the absence of the  
213 Wtf4<sup>antidote</sup>, however, limited our ability to explore their mechanisms of action in this system. We  
214 therefore tested if the Wtf4 proteins functioned in the budding yeast *Saccharomyces cerevisiae*.  
215 To do this, we cloned the coding sequences of *wtf4<sup>poison</sup>-GFP* and *wtf4<sup>antidote</sup>-mCherry* under the  
216 control of  $\beta$ -estradiol inducible promoters on separate plasmids (*Ottoz et al., 2014*). We then  
217 introduced these plasmids into *S. cerevisiae* individually and together. We found that cells  
218 carrying the *wtf4<sup>poison</sup>-GFP* plasmid were largely inviable when Wtf4<sup>poison</sup>-GFP expression was  
219 induced, indicating the poison is also toxic to *S. cerevisiae* (Figure 2A). However, cells  
220 expressing Wtf4<sup>antidote</sup>-mCherry had only a slight growth defect relative to control cells carrying  
221 empty plasmids (Figure 2A). Importantly, expression of the Wtf4<sup>antidote</sup>-mCherry plasmid largely  
222 ameliorated the toxicity of Wtf4<sup>poison</sup>-GFP (Figure 2A). Given that *S. pombe* and *S. cerevisiae*  
223 diverged >350 million years ago (*Hoffman et al., 2015*), our results suggest that the target(s) of  
224 Wtf4<sup>poison</sup> toxicity are conserved and the Wtf4<sup>antidote</sup> does not require cofactors that are specific to  
225 *S. pombe* or gametogenesis to neutralize Wtf4<sup>poison</sup>'s toxicity.

226

### 227 **Wtf4 poison and antidote proteins assemble into aggregates individually and together in** 228 **budding yeast**

229 We assayed the localization of the Wtf4 proteins in *S. cerevisiae* using the inducible *wtf4<sup>poison</sup>-*  
230 *GFP* and *wtf4<sup>antidote</sup>-mCherry* alleles described above. Similar to our observations in *S. pombe*  
231 meiosis, we saw that Wtf4<sup>poison</sup>-GFP localized as puncta of varying sizes throughout the

232 cytoplasm (Figure 2B). We also observed some Wtf4<sup>poison</sup>-GFP localized to the ER (Figure 2C,  
233 Figure 2-figure supplement 1A). Analogous to our observation in *S. pombe* spores, we saw  
234 nuclear condensation in cells expressing Wtf4<sup>poison</sup>-GFP relative to wild-type cells (Figure 2-  
235 figure supplement 1B-D).

236  
237 Wtf4<sup>antidote</sup>-mCherry, on the other hand, generally localized to one or two large amorphous  
238 regions adjacent to the vacuole (Figure 2D). When co-expressed, Wtf4<sup>poison</sup>-GFP and Wtf4<sup>antidote</sup>-  
239 mCherry co-localized to this region next to the vacuole (Figure 2E). In some cells, a faint circle  
240 of Wtf4<sup>poison</sup>-GFP could also be seen (likely ER localization); however, the majority colocalized  
241 with the antidote in the vacuole-associated region (Figure 2-figure supplement 1E, arrow). This  
242 localization was similar but not identical to our observations in *S. pombe* cells, where the Wtf4  
243 proteins localize within, rather than adjacent to, the vacuole. To ensure the difference in  
244 localization (sequestration to a single puncta) and cell viability of the Wtf4<sup>poison</sup>-GFP protein  
245 observed in the cells co-expressing Wtf4<sup>antidote</sup>-mCherry was not due to the mCherry tag, we  
246 also confirmed these results with an untagged Wtf4<sup>antidote</sup> (Figure 2-figure supplement 2A-B).

247  
248 Because the Wtf4 proteins colocalize, we wondered if they physically interact. We tested this  
249 using acceptor photobleaching Fluorescence Resonance Energy Transfer (FRET, *Sekar et al.*,  
250 2003, Figure 2F) in cells expressing both Wtf4<sup>poison</sup>-GFP and Wtf4<sup>antidote</sup>-mCherry proteins. This  
251 process involves bleaching the fluorescence of a tagged protein (the acceptor) and looking for a  
252 corresponding increase in fluorescence of another tagged protein (the donor). If an increase in  
253 fluorescence of the donor is observed, the proteins are said to be physically interacting, as they  
254 are in close enough proximity (less than 10 nanometers) to transfer energy to each other (*Sekar*  
255 *et al.*, 2003). When we bleached Wtf4<sup>antidote</sup>-mCherry, we saw a corresponding increase in  
256 Wtf4<sup>poison</sup>-GFP emission, supporting the idea that the two proteins physically interact (Figure 2F-  
257 2G, Figure 2-figure supplement 1F).

258  
259 The Wtf4 proteins localize as puncta of varying sizes, so we hypothesized that the proteins  
260 assemble into aggregates. To explore the nature of the Wtf4 protein assemblies, we utilized the  
261 recently developed Distributed Amphifluoric FRET (DAmFRET) assay (*Khan et al.*, 2018). This  
262 approach looks for FRET between red and green fluorophores in a partially photoconverted  
263 population of mEos3.1-tagged proteins as a measure of the protein's tendency to self-assemble  
264 (Figure 2-figure supplement 3A). We generated *wtf4<sup>antidote</sup>-mEos3.1* and *wtf4<sup>poison</sup>-mEos3.1*  
265 alleles, both under  $\beta$ -estradiol inducible promoters. Both tagged constructs encoded functional

266 proteins in *S. cerevisiae*, but the mEos3.1-tagged Wtf4<sup>poison</sup> allele was not as toxic as the GFP-  
267 tagged allele (Figure 2-figure supplement 3B). We then carried out DAmFRET analyses on cells  
268 expressing Wtf4<sup>antidote</sup>-mEos3.1 and on cells expressing Wtf4<sup>poison</sup>-mEos3.1. We observed high  
269 FRET signal between Wtf4<sup>antidote</sup>-mEos3.1 proteins and between Wtf4<sup>poison</sup>-mEos3.1 proteins. In  
270 fact, all cells expressing Wtf4<sup>poison</sup>-mEos3.1 or Wtf4<sup>antidote</sup>-mEos3.1 proteins exhibited FRET as  
271 compared to mEos3.1 negative control, regardless of the expression level of the proteins  
272 (Figure 2-figure supplement 3C). Collectively, these experiments confirm that the Wtf4 proteins  
273 self-assemble and assemble with each other.

274

### 275 **Homotypic interactions promote co-assembly of Wtf4 proteins and the neutralization of** 276 **Wtf4<sup>poison</sup>**

277 The Wtf4<sup>poison</sup> and Wtf4<sup>antidote</sup> proteins share the same 293 C-terminal amino acids (Figure 1A,  
278 Figure 1-figure supplement Figure 1A). All of the known active Wtf<sup>antidote</sup> proteins are highly  
279 similar to the Wtf<sup>poison</sup> they neutralize (*Bravo Núñez et al., 2020*). In addition, mutations that  
280 disrupt the similarity between a given Wtf<sup>antidote</sup> and Wtf<sup>poison</sup> can eliminate the ability of the  
281 Wtf<sup>antidote</sup> to neutralize the Wtf<sup>poison</sup> (*Hu et al., 2017; Bravo Núñez et al., 2018*). Here, we tested  
282 the mechanism underlying that requirement using Wtf4 proteins. Given that each Wtf4 protein  
283 self-assembles, we hypothesized that homotypic interactions between Wtf4<sup>poison</sup> and Wtf4<sup>antidote</sup>  
284 mediated their co-assembly and neutralization of the poison. To test this idea, we mutated  
285 sequences at the C-termini of the inducible *wtf4<sup>poison</sup>-GFP* and *wtf4<sup>antidote</sup>-mCherry* alleles in the  
286 *S. cerevisiae* plasmids described above. Specifically, we targeted our mutagenesis to a seven  
287 amino acid repeat sequence (IGNAFRG) that is found in many members of the *wtf* gene family  
288 (*Eickbush et al., 2019*). We previously showed that a mismatched number of these repeats  
289 between a Wtf poison and antidote proteins is enough to disrupt their specificity (*Bravo Núñez*  
290 *et al., 2018*). The wild-type *S. kambucha wtf4* allele contains ~1.5 repeat units (Figure 3A). To  
291 make the mutants, we inserted 18 additional codons into the repeat region of *wtf4* to make a  
292 total of four repeats. We denote these repeat insertion mutants with an \* (Figure 3A).

293

294 As expected, the Wtf4<sup>poison\*</sup>-GFP protein is functional (i.e. toxic) in *S. cerevisiae* and localizes  
295 similarly to the tagged wild-type Wtf4<sup>poison</sup>-GFP (Figure 3B, Figure 3-figure supplement 1A).  
296 Wtf4<sup>poison\*</sup>-GFP is neutralized by the matching Wtf4<sup>antidote\*</sup>-mCherry protein, and the two mutant  
297 proteins colocalized in vacuole-associated assemblies, just like the tagged wild-type proteins in  
298 *S. cerevisiae* (Figure 3B-C). Wtf4<sup>antidote\*</sup>-mCherry protein on its own also resembled the wild-  
299 type Wtf4<sup>antidote</sup>-mCherry allele (Figure 3-figure supplement 1B). Wtf4<sup>antidote\*</sup>-mCherry could not,



300 however, suppress the toxicity of the wild-type  $Wtf4^{\text{poison}}$ -GFP (Figure 3B). Similarly, the wild-  
301 type  $Wtf4^{\text{antidote}}$ -mCherry could not neutralize  $Wtf4^{\text{poison*}}$ -GFP (Figure 3B). The poison and  
302 antidote proteins did not colocalize in cells with incompatible poison and antidote proteins, and  
303 instead the poison proteins formed distributed aggregates, similar to cells expressing no  
304 antidote (Figure 3D, 3E).

305

### 306 **Electron microscopy reveals an association between $Wtf4$ aggregates and vesicles in *S.*** 307 ***cerevisiae***

308 We next used transmission electron microscopy (TEM) to analyze the environment of  $Wtf$   
309 proteins within the vacuole-associated aggregates. Similar to our observations made using  
310 fluorescence microscopy, we found using immuno-gold labeling that  $Wtf4$ -GFP largely clustered  
311 near the vacuole in cells also expressing untagged  $Wtf4^{\text{antidote}}$  (Figure 4A). These images also  
312 revealed that the  $Wtf4$  protein aggregates appeared within a cluster of lightly staining organelles  
313 resembling lipid droplets (Figure 4A, Figure 4-figure supplement 1A, 1C). Very few immunogold  
314 particles were found in the cells carrying only empty vectors, suggesting minimal background  
315 and high specificity of the GFP antibody used for the immuno-labeling (Figure 4-figure  
316 supplement 1B).

317

318 To look at these  $Wtf4$  aggregate-associated organelles at higher resolution, we used TEM with a  
319 sample preparation method that better maintains cellular morphology (see methods). We found  
320 that the organelles were in fact a mix of lipid droplets and large vesicles with bilayer membranes  
321 (Figure 4B arrows, Figure 4-figure supplement 2A-C). We quantified the number of lipid droplets  
322 and large vesicles in cells carrying empty vectors, cells carrying a vector with  $\beta$ -estradiol  
323 inducible  $Wtf4^{\text{antidote}}$ , and cells carrying both  $\beta$ -estradiol inducible  $Wtf4^{\text{antidote}}$  and  $\beta$ -estradiol  
324 inducible  $Wtf4^{\text{poison}}$ -GFP. We found that cells expressing  $Wtf4$  proteins had significantly more  
325 lipid droplets and large vesicles (Figure 4D, Figure 4-figure supplement 2F). These results  
326 indicate that the large aggregates that form in cells expressing  $Wtf4^{\text{antidote}}$  are embedded in a  
327 cluster of large vesicles and lipid droplets. This phenotype is reminiscent of another aggregation  
328 prone  $\alpha$ -synuclein protein, a protein associated with Parkinson's disease in humans, that when  
329 expressed in yeast forms cytoplasmic accumulations in association with clusters of vesicles  
330 (*Soper et al., 2008*). The  $\alpha$ -synuclein vesicles, however, appear smaller and more numerous  
331 than the  $Wtf4$ -associated vesicles. To test if the increase in vesicles and lipid droplets was a  
332 common feature of aggregation prone proteins, we expressed (using the  $\beta$ -estradiol system) a  
333 different vacuole-associate prion aggregate, Rnq1-mCardinal (Figure 4-figure supplement 2E).

334 We did not observe any association with vesicles or lipid droplets, suggesting that the increase  
335 in vesicles is due to the Wtf4 aggregates, not a consequence of the over-expression system or  
336 a general feature of aggregation prone proteins.

337

338 We also imaged cells expressing only Wtf4<sup>antidote</sup> or Wtf4<sup>poison</sup>. The morphology of cells  
339 expressing only the Wtf4<sup>antidote</sup> was indistinguishable from cells expressing both Wtf proteins  
340 (Figure 4-figure supplement 2D). It is difficult to interpret the observations from the (dying) cells  
341 expressing only Wtf4<sup>poison</sup> because the majority of the cells did not maintain cellular integrity  
342 during sample preparation (Figure 4-figure supplement 3A). In the few cells we could image, we  
343 observed diverse morphologies. We generally did not observe clustering of large vesicles and  
344 lipid droplets, as we saw in cells expressing Wtf4<sup>antidote</sup>. Instead, organelle integrity often looked  
345 disrupted and many cells expressing Wtf4<sup>poison</sup> appeared to have undergone extensive  
346 autophagy (Figure 4-figure supplement 3B, 3C, 3D).

347

#### 348 **Wtf4 poison-antidote protein aggregates localize to the IPOD and PAS in budding yeast**

349 Our results were reminiscent of other studies in which toxic aggregated proteins were  
350 neutralized via sequestration at cellular inclusions (*Kaganovich et al., 2008; Liu et al., 2010;*  
351 *Taylor et al., 2003; Chen et al., 2011; Hill et al., 2017; Tyedmers et al., 2010; Kryndushkin et al.,*  
352 *2012; Bagola et al., 2008; Arrasate et al., 2004*). In *S. cerevisiae*, stable, misfolded proteins are  
353 generally sequestered to the Insoluble Protein Deposit (IPOD), a compartment located near the  
354 vacuole and Pre-Autophagosomal Site (PAS) (*Kaganovich et al., 2008; Tyedmers et al., 2010,*  
355 *Suzuki and Ohsumi, 2010; Rothe et al., 2018*). This compartmentalization of  
356 damaged/misfolded proteins mitigates their toxic effects, as well as facilitating their disposal,  
357 some of which occurs via autophagy (*Marshall et al., 2016*).

358

359 Given that the Wtf4<sup>antidote</sup> and Wtf<sup>poison</sup>+Wtf4<sup>antidote</sup> aggregates localize adjacent to the vacuole,  
360 we hypothesized that they could be at the IPOD in *S. cerevisiae*. To test this idea, we looked for  
361 the localization of the Wtf4 proteins relative to Rnq1-mCardinal and GFP-Atg8. Rnq1 localizes  
362 to the IPOD and Atg8 is a component of the pre-autophagosomal structure that is adjacent to  
363 the IPOD (*Kaganovich et al., 2008; Tyedmers et al., 2010, Rothe et al., 2018*). Consistent with  
364 our hypothesis, we found that Wtf4<sup>antidote</sup>-mCherry either colocalized or was adjacent to Rnq1-  
365 mCardinal (Figure 5A, Figure 5-figure supplement 1A) and was adjacent to GFP-Atg8 (Figure 5-  
366 figure supplement 1C). Wtf4<sup>poison</sup>-GFP did not colocalize with Rnq1-mCardinal on its own,



367 supporting the idea that Wtf4<sup>antidote</sup> recruits the poison to the IPOD (Figure 5-figure supplement  
368 1B).

369

370 Proteins in the IPOD tend to be insoluble (*Kaganovich et al., 2008; Bagola et al., 2008*). To test  
371 if the Wtf4<sup>antidote</sup> shared this property in *S. cerevisiae*, we used half punctum-Fluorescence  
372 Recovery After Photobleaching (half-FRAP) (*Khan et al., 2018; Zhang et al., 2015*). This  
373 analysis revealed that the Wtf4<sup>antidote</sup>-mCherry aggregate has very low internal mobility and is  
374 thus more solid-like than liquid-like (Figure 5B). We were curious if the Wtf4<sup>antidote</sup> behaved  
375 similarly in its native context. To test this, we performed the half-FRAP assay on the Wtf4<sup>antidote</sup>-  
376 mCherry in *S. pombe* spores and again found very low protein mobility (Figure 5-figure  
377 supplement 1D-E).

378

### 379 **Genes involved in mitochondrial function, stress response pathways, and vesicle** 380 **trafficking are necessary to neutralize Wtf4 protein toxicity in budding yeast**

381 To better understand how toxic Wtf4 protein aggregates are neutralized, we screened for genes  
382 necessary for survival after induction of *wtf4*<sup>antidote</sup> and *wtf4*<sup>poison</sup>. Briefly, we screened the *S.*  
383 *cerevisiae* *MATa*, haploid deletion collection for mutants that failed to survive on galactose  
384 media when they carried plasmids encoding galactose-inducible *wtf4*<sup>antidote</sup>-mCherry and  
385 *wtf4*<sup>poison</sup>-GFP genes (Figure 5-figure supplement 2A-B). We found 106 mutants that could grow  
386 on galactose when carrying empty vector plasmids, but not when carrying both *wtf4* plasmids  
387 (Figure 5-source data 1).

388

389 Amongst our hits, the only significantly enriched (FDR  $p < 0.05$ ) gene ontology groups were  
390 mitochondrial translation and organization (Figure 5-source data 1). We speculate this  
391 enrichment is due to two known roles of mitochondria in managing protein aggregates. The first  
392 is the Mitochondria As Guardian In Cytosol (MAGIC) mechanism by which mitochondria help  
393 degrade protein aggregates (*Ruan et al., 2017*). The second is that mitochondria mitigate the  
394 impact of toxic aggregates by promoting asymmetric aggregate segregation in mitosis (*Zhou et*  
395 *al., 2014*).

396

397 We also identified genes involved in Cell Wall Integrity (CWI) pathways (*POP2, MPT5, SLT2*  
398 and *BCK1*) as necessary for survival after induction of Wtf4<sup>antidote</sup> and Wtf4<sup>poison</sup> (*Jin et al., 2015;*  
399 *Li et al., 2016; Stewart et al., 2007*). The CWI pathway is triggered by diverse stress stimuli  
400 (*Fuchs and Mylonakis, 2009*) and can promote stress-response gene expression and nuclear

401 release of cyclin-C ((Ssn8), also a hit in our screen) (*García et al., 2009*). Release of cyclin-C  
402 into the cytoplasm promotes mitochondrial hyper-fission, stress response gene activation, and  
403 either apoptosis or repair of the stress-induced damage (*Jin et al., 2015*). Consistent with this,  
404 we observed separated, significantly smaller mitochondria in cells expressing the Wtf4 proteins  
405 (Figure 4- figure supplement 2C, 2G). Altogether, our screen hits suggest links between the  
406 CWI stress response pathways, mitochondrial fission, and Wtf4 antidote function.

407  
408 Several other screen hits were genes with known roles in maintaining protein homeostasis  
409 and/or aggregate management. For example, we found that several genes involved in vesicle  
410 transport, endocytosis, and trafficking to the vacuole (e.g. *ATG11*, *SNF7*, and multiple *VPS*  
411 genes) are also required for survival when the Wtf4 proteins are expressed (Figure 5-source  
412 data 1). These hits suggest vacuolar trafficking pathways contribute to the neutralization of Wtf4  
413 protein aggregates. This is consistent with our EM analyses showing that the Wtf4<sup>antidote</sup>  
414 inclusion site is enriched with vesicles. Previous work demonstrated these pathways are also  
415 important for trafficking other proteins to the IPOD and for neutralizing the toxicity of the  
416 aggregation prone TDP-43 (*Rothe et al., 2018; He et al., 2006; Liu et al., 2017*).

417  
418 Given our results, which suggest that Wtf4 protein localization is an important factor in mitigating  
419 toxicity, we next imaged the localization of Wtf4<sup>poison</sup>-GFP and Wtf4<sup>antidote</sup>-mCherry in all of the  
420 screen hits. We found that the localization of the Wtf4<sup>poison</sup>-GFP and Wtf4<sup>antidote</sup>-mCherry proteins  
421 was disrupted in all 106 hits relative to wild type (where the proteins coalesce to the IPOD). In  
422 81 mutants, the Wtf4<sup>poison</sup>-GFP and Wtf4<sup>antidote</sup>-mCherry proteins localized as dispersed  
423 aggregates throughout the cell. These mutants included deletions of *YNL170W*, a reported  
424 dubious open reading frame, and *PHD1*, a transcriptional activator (Figure 5-figure supplement  
425 2B-C). We noted that there were often cells with dispersed Wtf4<sup>antidote</sup>-mCherry aggregates or  
426 cells with dispersed Wtf4<sup>poison</sup>-GFP aggregates, but rarely cells with both. We speculate this is  
427 due to toxicity of distributed aggregates and cells expressing both aggregates at the same time  
428 being destroyed quickly. Another common feature we saw throughout the screen hits was  
429 Wtf4<sup>antidote</sup>-mCherry signal in the vacuole. We also observed this vacuolar localization in the C-  
430 terminal mutants depicted in Figure 3D-E, so this appears to be a common feature of the  
431 Wtf4<sup>antidote</sup>-mCherry protein in cells being destroyed by Wtf4<sup>poison</sup>. Five mutants appeared to have  
432 wild-type looking Wtf4<sup>antidote</sup> (single inclusion outside the vacuole) but dispersed Wtf4<sup>poison</sup>,  
433 suggesting that the mutations may disrupt the interaction of the poison and antidote (Figure 5-

434 figure supplement 2D-E). Twenty hits showed very little Wtf4 signal and soluble cytoplasmic  
435 localization (Figure 5-figure supplement 2F).

436

437 Because the Wtf4<sup>antidote</sup> protein is quite similar to the Wtf4<sup>poison</sup> and also assembles into  
438 aggregates, we were curious if the Wtf4<sup>antidote</sup> alone was toxic in the absence of any of our  
439 screen hits. We therefore assayed the viability of the 106 deletion mutants when only Wtf4<sup>antidote</sup>  
440 was expressed. We saw that in approximately half (44/106) of the deletion strains, Wtf4<sup>antidote</sup>  
441 expression reduced viability (Figure 5-source data 1). These results are consistent with the idea  
442 that active aggregate management pathways are often required for cells to mitigate the toxicity  
443 of even the Wtf4<sup>antidote</sup> protein in *S. cerevisiae*.

444

445 We also investigated one hit from our screen, *VPS1*, more thoroughly using our  $\beta$ -estradiol-  
446 inducible system (described above). *VPS1* is a dynamin-like GTPase that is necessary for  
447 trafficking of aggregates to the IPOD and/or other inclusions sites (Kumar et al., 2016; Kumar et  
448 al., 2017; Hill et al., 2016, Marshall et al., 2016). In the absence of *VPS1*, we found that the  
449 Wtf4<sup>antidote</sup>-mCherry and Wtf4<sup>poison</sup>-GFP proteins still physically interact (Figure 5D-E, Figure 5-  
450 figure supplement 3A). The Wtf4 protein aggregates did not, however, coalesce to form large  
451 inclusions (Figure 5D) and Wtf4<sup>antidote</sup>-mCherry failed to neutralize the toxicity of Wtf4<sup>poison</sup>-GFP  
452 (Figure 5C).

453

454 Together, these experiments indicate that the physical interaction between the Wtf4<sup>poison</sup> and  
455 Wtf4<sup>antidote</sup> proteins is insufficient to neutralize the toxicity of Wtf4<sup>poison</sup> protein aggregates.  
456 Sequestering the aggregates to a vacuole-associated inclusion is also required. Interestingly,  
457 we also observed enhanced toxicity of the Wtf4<sup>antidote</sup>-mCherry protein in the absence of Vps1  
458 and many of our other screen hits (Figure 5C, Figure 5-source data 1). These results suggest  
459 that the antidote aggregates are more detrimental to cells when they are distributed in the  
460 cytoplasm. Importantly, however, even in the *vps1* $\Delta$  mutant, expression of Wtf4<sup>antidote</sup>-mCherry is  
461 less toxic to cells than Wtf4<sup>poison</sup>-GFP. This, and the fact that not all of the 106 hits caused  
462 Wtf4<sup>antidote</sup>-mCherry to become toxic, suggests there are fundamental differences in the poison  
463 and antidote aggregates beyond their propensity to be trafficked to a vacuole-associated  
464 inclusion.

465

## 466 Discussion

467 **Wtf4 proteins exploit conserved aspects of cell physiology to cause selective cell death**

468 Here we explored how the Wtf4<sup>poison</sup> protein kills cells and how the Wtf4<sup>antidote</sup> protein neutralizes  
469 the toxicity of the Wtf4<sup>poison</sup>. We used a combination of genetics and cell biology to study these  
470 proteins in three contexts: 1) their endogenous context of *S. pombe* gametogenesis, 2)  
471 vegetatively growing *S. pombe* cells, and 3) vegetatively growing *S. cerevisiae* cells. In all three  
472 contexts, expression of Wtf4<sup>poison</sup> alone kills cells and expression of the Wtf4<sup>antidote</sup> rescues the  
473 toxicity. The simplest interpretation of these observations is that Wtf4<sup>poison</sup> exploits or disrupts a  
474 conserved aspect of cellular physiology that is important during both vegetative growth and  
475 gametogenesis. Similarly, the Wtf4<sup>antidote</sup> neutralizes the Wtf4<sup>poison</sup> using conserved cofactors that  
476 can act in both vegetative growth and gametogenesis. This conservation suggests that *wtf*-  
477 derived gene drives could be a useful tool for genetically altering populations.

478

### 479 **Wtf4<sup>poison</sup> proteins assemble into toxic aggregates**

480 In *S. pombe* gametogenesis and in vegetative *S. cerevisiae* cells, we observed the Wtf4<sup>poison</sup>-  
481 GFP proteins assembled into small foci (aggregates) in the absence of Wtf4<sup>antidote</sup>. The  
482 aggregates were largely dispersed throughout the cytoplasm, with some ER localization in *S.*  
483 *cerevisiae*. The assembly of Wtf4 proteins is reminiscent of another meiotic drive element, Het-  
484 s, which employs prion-like amyloid polymerization to convert Het-S proteins to a lethal form  
485 (*Dalstra et al., 2003; Riek and Saupé, 2016*). We therefore evaluated whether Wtf4<sup>poison</sup> proteins  
486 exhibit prion activity in *S. cerevisiae* using DAmFRET (*Khan et al., 2018*). We found that  
487 Wtf4<sup>poison</sup>-mEos proteins assembled with themselves even at very low expression levels  
488 (Figure2-figure supplement 3C). In fact, we were unable to detect cells that lacked self-  
489 assemblies, revealing that the toxic form of the protein is not appreciably supersaturated, as  
490 would be required for Wtf4<sup>antidote</sup> to detoxify it through a simple prion-like mechanism.  
491 Nevertheless, the sequence-dependent self-assembly of Wtf4 remains consistent with amyloid  
492 polymerization. However, given its intimate association with vesicles, extensive testing would be  
493 required to further evaluate the structural basis of Wtf4 activity.

494

495 The significance of the Wtf4<sup>poison</sup> aggregation is not clear. We speculate that the aggregation  
496 propensity is intimately tied to the toxicity of Wtf4<sup>poison</sup>. We propose that distributed Wtf4  
497 aggregates interact broadly with other proteins and disrupt their folding or localization.  
498 Compounding effects of these hypothesized interactions could disrupt protein homeostasis or  
499 cellular integrity, leading to cell death. This death may occur via a programmed cell death  
500 pathway, as in both *S. pombe* gametogenesis and in vegetative *S. cerevisiae*, cells succumbing  
501 to the Wtf4<sup>poison</sup> exhibit nuclear condensation (followed by nuclear fragmentation in *S. pombe*).

502 The death may also be related to loss of cell wall integrity, as CWI pathways are necessary for  
503 cell survival upon expression of the Wtf4 proteins. Testing these ideas may be challenging,  
504 especially if understanding Wtf4<sup>poison</sup> toxicity proves to be as elusive as understanding the  
505 intensely studied neurotoxic aggregating proteins TDP-43 and  $\alpha$ -Synuclein (*Johnson et. al,*  
506 *2011; Cookson et. al, 2007*).

507

### 508 **Wtf4<sup>antidote</sup> promotes neutralization of Wtf4<sup>poison</sup> via recruitment to vacuole-associated** 509 **sites**

510 Like Wtf4<sup>poison</sup>, the Wtf4<sup>antidote</sup> also assembles into aggregates in both *S. pombe* and *S.*  
511 *cerevisiae* cells. Unlike the Wtf4<sup>poison</sup>, however, the Wtf4<sup>antidote</sup> aggregates have little effect on the  
512 viability of wild-type vegetative cells or *S. pombe* spores. This is surprising given the similarity of  
513 the two proteins (the Wtf4<sup>poison</sup> shares 292 of the Wtf4<sup>antidote</sup>'s 337 amino acids). Our data  
514 suggest that the localization of the aggregates and/or the exposed aggregate surface area could  
515 underlie their differences in toxicity. The Wtf4<sup>poison</sup> aggregates (without Wtf4<sup>antidote</sup>) remain largely  
516 dispersed in the cytoplasm, whereas the Wtf4<sup>antidote</sup> proteins are trafficked to a confined region  
517 near or within the vacuole. In *S. pombe* cells, the Wtf4<sup>antidote</sup> aggregates enter the vacuole. In *S.*  
518 *cerevisiae* cells, the Wtf4<sup>antidote</sup> accumulates outside the vacuole in the IPOD. However, it is  
519 unclear if some of Wtf4<sup>antidote</sup> aggregates also enter the vacuole and are quickly degraded in *S.*  
520 *cerevisiae*.

521

522 When we disrupted the ability of *S. cerevisiae* cells to transport the Wtf4<sup>antidote</sup> aggregates with  
523 the *vps1* $\Delta$  mutation, we found that the Wtf4<sup>antidote</sup> aggregates were distributed and more toxic  
524 than in wild-type cells. This is consistent with the idea that a key feature of Wtf4 protein toxicity  
525 relies in the aggregates being widely dispersed in the cytoplasm. When Wtf4<sup>poison</sup> and Wtf4<sup>antidote</sup>  
526 are found together in wild-type cells, the proteins co-assemble into aggregates. The co-  
527 assembled aggregates then behave similarly to the Wtf4<sup>antidote</sup> aggregates and are trafficked into  
528 the vacuole (in *S. pombe* cells) or to the IPOD adjacent to the vacuole (in *S. cerevisiae* cells)  
529 where they cause limited toxicity. Also, like the Wtf4<sup>antidote</sup> aggregates, the toxicity of the  
530 Wtf4<sup>poison</sup>+Wtf4<sup>antidote</sup> co-assembled aggregates is greatly enhanced if aggregate transport to the  
531 vacuole is disrupted by mutations (*e.g. vps1* $\Delta$ ).

532

533 Together, our observations suggest a mechanistic model for *wtf4* function. In this model, *wtf4*  
534 exploits protein aggregation control pathways to induce selective cell death. The Wtf4<sup>poison</sup> forms  
535 distributed toxic aggregates and the Wtf4<sup>antidote</sup> co-assembles with the Wtf4<sup>poison</sup> and neutralizes

536 the aggregate's toxicity via sequestration (Figure 6). This mechanism is unlike the mechanism  
537 of any other meiotic driver described to date (*Grognet et al., 2014; Didion et al., 2015; Long et*  
538 *al., 2008; Dawe et al., 2018; Rhoades et al., 2019; Dalstra et al., 2005; Hammond et al., 2012;*  
539 *Vogan et al., 2019, Chen et al., 2008; Akeru et al., 2017; Bauer et al., 2012; Pieper et al., 2018;*  
540 *Herrmann et al., 1999; Shen et al., 2017; Yu, et al., 2018; Bauer et al., 2007; Wu et al., 1988;*  
541 *Xie, et al., 2019; Kruger et al., 2019; Lin et al., 2018*), but there are very few mechanistically  
542 characterized gamete-killing drive systems (reviewed in *Bravo Núñez et al., 2018*).

543

544 Continued investigation into how fission yeast and budding yeast species handle Wtf4  
545 aggregates may elucidate important biological features of the two yeasts as well as a more  
546 detailed Wtf4 mechanism. Much less is known about aggregate management in *S. pombe*, but it  
547 offers an excellent model for understanding the process in symmetrically dividing cells (*Coelho*  
548 *et al., 2014*).

549

#### 550 **A controlled protein aggregation model offers a solution to the *wtf* diversity paradox**

551 This study focused on the *wtf4* meiotic driver. There is, however, an incredibly diverse array of  
552 *wtf* genes that cause meiotic drive. For example, the poison protein encoded by *wtf35* (from the  
553 FY29033 isolate) shares less than 23% amino acid identity with Wtf4<sup>poison</sup> (*Bravo Núñez et al.,*  
554 *2020*). Despite that extreme divergence, both genes cause essentially the same phenotype:  
555 drive of the gene into > 90% of the progeny of a heterozygote (*Bravo Núñez et al., 2020*). The  
556 conserved protein aggregation model offers an explanation for how such a diverse array of  
557 proteins can cause the same phenotype. Under our model, the mechanism of the Wtf<sup>poison</sup>  
558 proteins is dependent upon their aggregation propensity. Presumably, the evolution of a protein  
559 that must self-aggregate could be less constrained than the evolution of a protein that must  
560 maintain a specific enzymatic activity or interaction partner.

561

562 Exon 1 of the *wtf4* driver encodes the antidote-specific residues (45 amino acids) that facilitate  
563 the recruitment of Wtf4 aggregates to the vacuole in *S. pombe* (or the IPOD in *S. cerevisiae*).  
564 This antidote-specific function likely relies on unidentified interacting partners (perhaps amongst  
565 our screen hits). This specific functional requirement could explain the greater conservation of  
566 exon 1-encoded residues amongst *bona fide wtf* drivers (68-100% amino acid identity)  
567 compared to the conservation amongst the remaining exons (30-90% amino acid identity)  
568 (*Bravo Núñez et al., 2020*).

569



570 Importantly, our model also suggests that aggregate management may be a major feature of  
571 gametogenesis in *S. pombe*. The number of *wtf* genes varies between different isolates, but  
572 most have 30 or more *wtf* genes (Eickbush et al., 2019). Four of these genes are widely  
573 diverged from *wtf4* and are either not expressed in gametogenesis or their proteins exhibit  
574 distinct cellular localization from known Wtf<sup>poison</sup> and Wtf<sup>antidote</sup> proteins (Bravo Núñez et al.,  
575 2020). The rest of the genes are similar to *wtf4* in expression and localization. It is not clear how  
576 many are expressed in a given cell, but they all appear to be transcribed at some level  
577 (Eickbush et al., 2019; Kuang et al., 2016). It will be interesting to explore the direct and indirect  
578 impacts of these Wtf proteins on *S. pombe* gametogenesis.

579

### 580 **Additional cellular factors are required to neutralize toxicity of Wtf4 proteins**

581 The genetic screen presented in this work identified a number of factors required for cell viability  
582 in *S. cerevisiae* cells expressing Wtf4<sup>poison</sup> and Wtf4<sup>antidote</sup>. Many of these genes informed our  
583 model for Wtf4 protein function and therefore fit nicely within our proposed model. For example,  
584 our screen implicated genes involved in the Cytoplasm-to-Vacuole Targeting (CVT) pathway as  
585 necessary for survival of the Wtf4 proteins. This pathway has been previously implicated in  
586 aggregate management (Kumar et al., 2016; Kumar et al., 2017).

587

588 Not all of our screen hits, however, are in genes or pathways with annotated roles that clearly fit  
589 our model. Some of the genes have no annotated functions. It is possible that at least some of  
590 these genes are not directly involved in aggregate management, but the mutants are especially  
591 sensitive to the stresses imposed by Wtf4 aggregates. It is also possible that some of the genes  
592 do have roles in mitigating the effects of toxic aggregates. Indeed, in deletions of some genes  
593 with unknown functions, we saw distributed Wtf4 aggregates, suggesting these unknown  
594 proteins could play a role in sequestration of aggregates. Interestingly, other hits are in well-  
595 studied genes, such as multiple acetyltransferases and various kinetochore proteins. Future  
596 analysis of these hits will be essential to refine or to potentially reject our current model.

597

### 598 **Insight into protein cellular response to aggregates via studying meiotic drive**

599 Studying how parasites manipulate their hosts can uncover unexpected insights on the host's  
600 biology. For example, studies of the mouse *t*-haplotype meiotic driver revealed that gene  
601 expression in spermatids can create sperm-autonomous phenotypes, even though spermatids  
602 are connected by intercellular bridges (Herrmann et al., 1999). Under our model, a fine line  
603 exists between protein aggregates that cells can manage (*i.e.* Wtf4<sup>antidote</sup>) and lethal aggregates



604 that are not effectively managed (*i.e.* Wtf4<sup>poison</sup>). We propose that the *wtf4* meiotic driver has  
605 exploited this feature for its own selfish advantage. Future studies can now exploit the Wtf4  
606 proteins to learn about protein aggregate toxicity and cellular aggregate management  
607 strategies.

608

## 609 **Materials and Methods**

610

611 We confirmed all the vectors we generated (described below) via sequencing.

612

### 613 **Generation of tagged *wtf4* alleles for expression in *S. pombe* gametogenesis**

614 *Generation of a vector containing *wtf4*<sup>antidote</sup>-mCherry expressed from the endogenous promoter.*

615 We amplified the beginning of *wtf4* (including the endogenous promoter) from pSZB260  
616 (described below) using oligos 688+719. The rest of the *wtf4*<sup>antidote</sup>-mCherry sequence was  
617 amplified (using oligos 605+1751) from pSZB708 (described below). The *ADH1* transcriptional  
618 terminator sequence was amplified from pSZB203 (Nuckolls *et al.*, 2017) using oligos  
619 1750+634. We then used overlap PCR (using oligos 688+634) to combine the three pieces. We  
620 then cloned the complete *wtf4*<sup>antidote</sup>-mCherry cassette into the SacI site of pSZB331 (Bravo  
621 Núñez *et al.*, 2020) to generate pSZB891.

622

623 *Generation of a vector containing *wtf4*<sup>antidote</sup>-GFP expressed from the endogenous promoter.*

624 We amplified the upstream sequence and the beginning of the *wtf4* allele from pSZB203  
625 (Nuckolls *et al.*, 2017) using oligos 620+736. We amplified the rest of the *wtf4*-GFP sequence  
626 (with an *ADH1* transcriptional terminator) from pSZB203 using oligos 735+634. Oligos 734 and  
627 735 introduced mutations that interrupt the Wtf4<sup>poison</sup> start site within intron 1. We then used  
628 overlap PCR with oligos 620+634 to unite the two pieces. We digested the complete *wtf4*<sup>antidote</sup>-  
629 GFP cassette with SacI site and cloned it into the SacI site of pSZB188 (Nuckolls *et al.*, 2017) to  
630 generate pSZB260.

631

632 *Generation of a vector containing the predicted *wtf4*<sup>antidote</sup> coding sequence expressed from the*  
633 *endogenous promoter.* We amplified the *wtf4* coding sequence in three pieces. We amplified the

634 promoter with oligos 633+604 using SZY13 DNA as a template. We amplified the coding  
635 sequence from a gBlock DNA fragment (Integrated DNA Technologies, Inc., Coralville) using  
636 oligos 605+614. We amplified the sequence downstream of *wtf4* using oligos 613+635 and  
637 SZY13 genomic DNA as a template. We then stitched the three pieces together using overlap  
638 PCR with oligos 633+635. We then digested the product with SacI and ligated the cassette into  
639 SacI-digested pSZB188 (Nuckolls *et al.*, 2017)<sup>15</sup> to generate pSZB199. Intron 5 was predicted  
640 wrong, so there is a mutation at the C-terminus. Within this study, this plasmid was only used to

641 build other plasmids, and when used in subsequent steps, we repaired the C-terminal mutation  
642 with the PCR oligos.

643

### 644 **S. pombe Z<sub>3</sub>EV $\beta$ -Estradiol inducible system**

645 Z<sub>3</sub>EV promoter system is a titratable inducible promoter system (Ohira *et al.*, 2017). The system  
646 requires the Z<sub>3</sub>EV transcription factor and a Z<sub>3</sub>EV-responsive promoter (Z<sub>3</sub>EVpr).  $\beta$ -estradiol  
647 induces nuclear import of the Z<sub>3</sub>EV protein; therefore, genes placed immediately downstream of  
648 Z<sub>3</sub>EVpr in a strain expressing Z<sub>3</sub>EV become expressed upon  $\beta$ -estradiol addition to the media.

649

650 *Background strain construction:* To integrate the Z<sub>3</sub>EV transcription factor at the *leu1* locus of *S.*  
651 *pombe*, we digested plasmid pFS461 (Addgene #89064, Ohira *et al.*, 2017) with XhoI and  
652 transformed it into the yeast strain SZY643 (selecting for Leu+) via standard lithium acetate  
653 protocol (Gietz, *et al.*, 1995). This generated the yeast strain SZY2690, into which we  
654 transformed all of the proteins with Z<sub>3</sub>EV promoters (see below).

655

656 *Generation of a strain that expresses wtf4<sup>antidote</sup>-mCherry under the control of a  $\beta$ -estradiol  
657 inducible promoter:* We amplified the Z<sub>3</sub>EVpr from pFS478 (Addgene #89066, Ohira *et al.*, 2017)  
658 using oligos 1734+1735. We then amplified the *wtf4<sup>antidote</sup>-mCherry* sequence (with an *ADH1*  
659 transcriptional terminator) from pSZB891 (described above) using oligos 1738+634. We used  
660 overlap PCR to add the Z<sub>3</sub>EV promoter piece to the *wtf4<sup>antidote</sup>-mCherry* piece using oligos  
661 1738+634. We then digested this cassette with SacI and ligated it into the SacI site of pSZB322  
662 (Bravo Núñez *et al.*, 2018), a *lys4* integrating vector with a *hphMX6* cassette, to create  
663 pSZB892. We cut pSZB892 with KpnI and integrated into the *lys4* locus of SZY2690 to create  
664 SZY2740.

665

666 *Generation of a strain that expresses wtf4<sup>antidote</sup>-mCherry and wtf4<sup>poison</sup>-GFP under the control of  
667  $\beta$ -estradiol inducible promoters:* To create an estradiol inducible Wtf4<sup>poison</sup>-GFP vector, we  
668 amplified the Z<sub>3</sub>EVpr on pSZB892 (see above) using oligos 1734+2068. We amplified the  
669 Wtf4<sup>poison</sup>-GFP (with an *ADH1* transcriptional terminator) from pSZB203 (Nuckolls *et al.*, 2017)  
670 using oligos 2069+634. We then completed overlap PCR (using oligos 1734+634) on the two  
671 pieces. We then digested the completed *wtf4<sup>poison</sup>-GFP* cassette with SacI and ligated it into the  
672 SacI site of pSZB331 (see above) to create pSZB975. We cut pSZB975 with KpnI and  
673 integrated into the *ura4* locus of SZY2740 to generate SZY2888.

674

675 For the above transformations, we used high-efficiency, lithium acetate transformation protocol  
676 (Gietz, *et al.*, 1995) to integrate the vectors, selecting first for drug resistance and then

677 screening for the relevant auxotrophy.

678

679 *Induction of Wtf proteins:* For imaging cells (Figures 1E-F, Figure 1-Figure Supp 3), we created  
680 5 ml saturated overnight cultures in rich YEL broth (0.5% yeast extract, 3% glucose, 250 mg/L  
681 of adenine, leucine, lysine, histidine, and uracil) supplemented with 100 ug/ml G418 and  
682 Hygromycin B (to select against pop-outs of the *lys4* and *ura4* integrating plasmids described  
683 above). The next day, we diluted 1 ml of each saturated culture into 4 mls of fresh  
684 YEL+G418+HYG media. We then added  $\beta$ -estradiol (from VWR, #AAAL03801-03) to a final  
685 concentration of 100 nM and shook the cultures at 32°C for four hours. We then used these  
686 induced cultures for imaging (see below for microscopy details).

687

### 688 ***S. cerevisiae* LexA-ER-AD $\beta$ -estradiol inducible system**

689 The LexA-ER-AD system (Ottoz *et al.* 2014) utilizes a heterologous transcription factor  
690 containing a LexA DNA-binding protein, the human estrogen receptor (ER) and an activation  
691 domain (AD).  $\beta$ -estradiol binds the ER and tightly regulates the activity of the LexA-ER-AD  
692 transcription factor. The LexA DNA-binding domain recognizes *lexA* boxes in the target  
693 promoter.

694

695 *Background strain construction:* To integrate the PACT1-LexA-ER-haB42 transcription factor  
696 into the *his3-11,15* locus of *S. cerevisiae*, we digested plasmid FRP718 (Addgene #58431,  
697 Ottoz *et al.* 2014) with NheI and transformed it into the yeast strain SLJ769 via standard lithium  
698 acetate protocol (Gietz, *et al.*, 1995) selecting for His<sup>+</sup> cells. This generated SZY1637, the  $\beta$ -  
699 estradiol inducible PACT1-LexA-ER-haB42 transcription factor strain, into which we transformed  
700 all the plasmids carrying genes under the control of LexA box containing promoters (LexApr)  
701 (see below). We generally used the ‘Sleazy’ transformation protocol (incubate 240  $\mu$ l 50%  
702 PEG3500 + 36  $\mu$ l 1M Lithium Acetate + 50  $\mu$ l boiled salmon sperm + 1-5  $\mu$ l DNA + a match  
703 head amount of yeast overnight at 30°C; modified from Elble, 1992) to introduce plasmids into  
704 *S. cerevisiae*. We selected transformants on Synthetic Complete (SC) media (6.7 g/L yeast  
705 nitrogen base without amino acids and with ammonium sulfate, 2% agar, 1X amino acid mix,  
706 2% glucose) lacking appropriate amino acids for selection of the transformed plasmids.

707

708 *Generation of a vector containing *wtf4<sup>poison</sup>*-GFP under the control of a  $\beta$ -estradiol inducible*  
709 *promoter:* We amplified the LexApr from on FRP1642 (Addgene #58442, Ottoz *et al.* 2014)  
710 using oligos 1195+1240. We cloned the promoter into the KpnI/XhoI sites of pSZB464 (see  
711 below) to create pSZB585.

712

713 *Generation of empty vectors containing only the  $\beta$ -estradiol inducible promoter:* We amplified  
714 the LexApr from FRP1642 (Addgene #58442, *Ottoz et al. 2014*) using oligos 1195+1240. We  
715 cloned that promoter into KpnI+XhoI-digested pRS314 (ARS CEN *TRP1* vector, *Sikorski et al.*,  
716 1989) to generate pSZB668. We also cloned it into the KpnI+XhoI site of pRS316 (ARS CEN  
717 *URA3* vector, *Sikorski et al.*, 1989) to generate pSZB670.

718  
719 *Generation of a vector containing  $wtf4^{antidote}$ -mCherry under the control of a  $\beta$ -estradiol inducible*  
720 *promoter:* We first amplified  $wtf4^{antidote}$  (using oligos 1402+1401), *mCherry* (using oligos  
721 1400+1399), and the *CYC1* transcriptional terminator (using oligos 1398+964) individually,  
722 using pSZB700 (see below) as the PCR template in all three reactions. We then used overlap  
723 PCR (using oligos 1402+964) to unite the three pieces into the  $wtf4^{antidote}$ -*mCherry* cassette. We  
724 then digested the LexApr out of pSZB668 (with KpnI+XhoI) and ligated it, along with the  
725  $wtf4^{antidote}$ -*mCherry* cassette (digested with XhoI+BamHI), into KpnI+BamHI-digested pRS314  
726 (*Sikorski et al.*, 1989) to generate pSZB708.

727  
728 *Generation of a vector containing mCherry- $wtf4^{antidote}$  under the control of a  $\beta$ -estradiol inducible*  
729 *promoter:* We amplified *mCherry- $wtf4^{antidote}$*  coding sequence from pSZB248 (*Nuckolls et al.*,  
730 2017) using oligos 1066+604 and amplified the C-terminus of  $wtf4^{antidote}$  plus the *CYC1*  
731 terminator from pSZB497 (see below) using oligos 1065+964. We then used overlap PCR  
732 (using oligos 1326+964) to join the two pieces. We digested the LexApr out of pSZB668 using  
733 KpnI and XhoI, and ligated that promoter, along with the XhoI-BamHI-digested *mCherry-*  
734  $wtf4^{antidote}$  cassette made by overlap PCR into KpnI-BamHI-digested pRS314 (*Sikorski et al.*,  
735 1989) to generate pSZB700.

736  
737 *Generation of a vector containing  $wtf4^{antidote}$  under the control of a  $\beta$ -estradiol inducible*  
738 *promoter:* We digested the galactose inducible promoter out of pSZB497 (see above) w/ KpnI  
739 and XhoI. We amplified the LexApr (using oligos 1195+1240) from FRP1642 (Addgene #58442,  
740 *Ottoz et al. 2014*), digested with KpnI+XhoI, and ligated it into KpnI-XhoI-digested pSZB497 to  
741 generate pSZB589.

742  
743 *Induction of Wtf4 proteins with  $\beta$ -estradiol:* For imaging, we grew 5 mL saturated overnight  
744 cultures in SC -His -Ura -Trp (without agar). The next day, we diluted 1 ml of the saturated  
745 culture into 4 mls of media of the same type. We then added  $\beta$ -estradiol to a final concentration  
746 of 500 nM and shook the cultures at 30°C to induce. Cells were induced for four hours and then  
747 imaged at one or multiple timepoints, depending on the experiment. For spot assays, we diluted  
748 saturated cultures to an OD of ~1, then serially diluted ( $10^0, 10^{-1}, 10^{-2}, 10^{-3}, 10^{-4}$ ) in a 96-well plate.

749 We then spotted 10 ul of each dilution onto SC -His -Ura -Trp media and the same media with  
750 500 nM  $\beta$ -estradiol. We grew the plates 2 to 3 days at 32°C and imaged on a Splmager (S&P  
751 Robotics).

752

### 753 **S. cerevisiae galactose inducible system**

754 *Generation of a vector containing wtf4<sup>antidote</sup> under the control of a galactose inducible promoter:*

755 We amplified the beginning of the *wtf4<sup>antidote</sup>* coding sequence from pSZB388 (see below) using  
756 oligos 1065+678 and amplified the rest of *wtf4<sup>antidote</sup>* (and the *CYC1* transcriptional terminator)  
757 from pSZB392 (see below) using oligos 679+964. We then used overlap PCR with oligos  
758 1065+964 to join the two pieces. We then digested the complete *wtf4<sup>antidote</sup>* cassette with XhoI  
759 and BamHI and ligated them into XhoI+BamHI-digested pDK20 (*DasGupta et al, 1998*) to  
760 generate pSZB497.

761

762

763 *Generation of a vector containing wtf4<sup>poison</sup>-GFP under the control of a galactose inducible*

764 *promoter:* We first amplified *wtf4<sup>poison</sup>* followed by a *CYC1* terminator from pSZB388 (see below)  
765 using oligos 963+964. We then digested the PCR product with XhoI and BamHI and ligated it  
766 into XhoI+BamHI-digested pDK20 (*DasGupta et al, 1998*). This created pSZB392, a *URA3*  
767 integrating vector with *wtf4<sup>poison</sup>* under the control of a *GAL* promoter. We then amplified  
768 *wtf4<sup>poison</sup>* (including the *GAL* promoter) from pSZB392 with oligos 1045+606 and amplified GFP  
769 followed by an *ADH1* transcriptional terminator from pSZB203 (*Nuckolls et al., 2017*) using  
770 oligos 998+1040. We then stitched those two PCRs together using overlap PCR (amplifying  
771 with oligos 1040+1045). Finally, we digested the PCR product with KpnI and BamHI and cloned  
772 it into KpnI+BamHI-digested pRS316 (*Sikorski et al, 1989*) to generate pSZB464 and into  
773 KpnI+BamHI-digested pRS314 (*Sikorski et al, 1989*) to generate pSZB463.

774

775 *Generation of a vector containing wtf4<sup>antidote</sup>-mCherry under the control of a galactose inducible*

776 *promoter:* We amplified the *wtf4<sup>antidote</sup>* sequence with the galactose inducible promoter from  
777 pSZB497 (see above) using oligos 1929+997 and the *wtf4<sup>antidote</sup>-mCherry* sequence (with a  
778 *CYC1* terminator) from pSZB708 (see above) using oligos 1072+964. We then used overlap  
779 PCR using oligos 1929+964 to combine the two pieces. We then digested the complete  
780 *wtf4<sup>antidote</sup>-mCherry* cassette with BamHI and ligated it into BamHI-digested PRS315 (*Sikorski et*  
781 *al, 1989*)<sup>63</sup> to generate pSZB1005.

782

783 *Generation of a vector containing wtf4<sup>poison</sup> coding sequence:* We amplified the *wtf4<sup>poison</sup>* coding

784 sequence from pSZB199 (see above) using oligos 916+926. We then digested the PCR product



785 with SfiI and cloned into SfiI-digested pBT3-STE (P03233DS from DUALsystems Biotech) to  
786 generate pSZB388. Within this study, this plasmid was only used to build other plasmids.

787  
788 *Induction of Wtf4 proteins with galactose:* For imaging, we grew 5 ml saturated overnight  
789 cultures in SC media lacking appropriate amino acids for selection of the plasmids. The next  
790 day, we pelleted the cultures, resuspended in YP raffinose media, and grew overnight. The next  
791 day, we diluted 1 ml of the saturated raffinose culture into 4 mLs of SC galactose media lacking  
792 amino acids for selection of plasmids. We then added  $\beta$ -estradiol to a final concentration of 500  
793 nM and shook the cultures at 30°C for four hours to create induced samples. For spot assays,  
794 we diluted saturated cultures to an OD of  $\sim 1$ , then serially diluted ( $10^0, 10^{-1}, 10^{-2}, 10^{-3}, 10^{-4}$ ) in a 96-  
795 well plate. We then spotted 10  $\mu$ l of each dilution onto both SC media (lacking amino acids  
796 appropriate for selection of the plasmids) and SC galactose media lacking the same amino  
797 acids. We grew the plates 2 to 3 days at 32°C and imaged them on a Splmager (S&P Robotics).

798

### 799 **Construction of the ER marker in *S. pombe***

800 To create the Sec63-YFP strain, we PCR amplified the C-terminus of *sec63* (using oligos  
801 939+941) and the sequence downstream of *sec63* (using oligos 945+946) using SZY643 as a  
802 template. We also amplified a YFP-*HIS3* cassette from pYM41 (*Janke et al., 2004*) using oligos  
803 944+943. We then used overlap PCR (using oligos 939+943) to unite those three PCR  
804 products. We then transformed this PCR product into GP1163 with standard lithium acetate  
805 protocol (*Gietz, et al., 1995*) (selecting for His<sup>+</sup>) to integrate the tagged *sec63-YFP* at its  
806 endogenous locus to generate SZY1277. We confirmed the strain via PCR using oligos  
807 2037+2038.

808

### 809 **Generation the IPOD marker for expression in *S. cerevisiae***

810 *Generation of a vector containing RNQ1-mCardinal under the control of a  $\beta$ -estradiol inducible*  
811 *promoter:* We amplified the LexApr from pSZB708 using oligos 1835+1834, the *RNQ1*  
812 sequence from pDK412 (*Kryndushkin et. al, 2012*) using oligos 1833+1832 and the mCardinal-  
813 *CYC1* terminator from V08\_mC (a gift from the Halfmann lab) using oligos 1831+964. We then  
814 used overlap PCR (using oligos 1835+964) to stitch the three pieces together. We then digested  
815 the cassette with BamHI and ligated it into BamHI-digested pRS315 (*Sikorski et al, 1989*) to  
816 generate pSZB942.

817

### 818 **Construction of *vps1* $\Delta$ *S. cerevisiae* strain**

819 We PCR amplified the *vps1Δ::kanMX* locus out of strain YKR001C from the haploid yeast  
820 knockout *MATa* collection (Open Biosystems) (using oligos 1850+1851) and transformed the  
821 PCR product into SLJ769 using high efficiency lithium acetate protocol (selecting for G418  
822 resistance) to create strain SZY2539. We used PCR (using oligos 1712+1713) and sequenced  
823 the locus to confirm the deletion. To add the PACT1-LexA-ER-haB42 transcription factor, we  
824 digested FRP718 (Addgene #58431, *Ottoz et al. 2014*) with NheI and integrated it into SZY2539  
825 at the *his3-11,15* locus (using standard lithium acetate protocol (*Gietz, et al., 1995*) and  
826 selecting for His+) to create SZY2552.

827

### 828 **Generation of the *wtf4* exon 6 mutant alleles for expression in *S. pombe***

829 *Generation of a vector containing wtf4\*-GFP allele under the endogenous promoter:* We  
830 introduced the mutation within exon 6 of *wtf4* using PCR (oligos 1280 and 1281 contain the  
831 desired mutation). We amplified the endogenous promoter and beginning of *wtf4* using oligos  
832 688+1280 and pSZB203 as a template. We amplified the rest of *wtf4* and the downstream  
833 sequence using oligos 1281+686 and pSZB203 as a template. We used overlap PCR using  
834 oligos 688+686 to join the two pieces. We then digested the PCR product with SacI and cloned  
835 it into the SacI site of pSZB386 (*Bravo Núñez et al., 2018*) to generate pSZB647. Within this  
836 study, this plasmid was only used to build other plasmids.

837

### 838 **Generation of the *wtf4* exon 6 mutant alleles for expression in *S. cerevisiae***

839 *Generation of a vector containing wtf4<sup>antidote\*</sup>-mCherry under the control of a  $\beta$ -estradiol*  
840 *inducible promoter:* We amplified the beginning of *wtf4<sup>antidote\*</sup>* (using oligos 1402+1021) from  
841 pSZB700 (see above), the mutated section of *wtf4<sup>antidote\*</sup>* (using oligos 1072+997) from  
842 pSZB647 (see above) and mCherry-CYC1 terminator (using oligos 998+964) from pSZB708  
843 (see above). We then stitched the three pieces together (using 1402+964) to generate the  
844 complete *wtf4<sup>antidote\*</sup>-mCherry* cassette and digested it with XhoI and BamHI. We also digested  
845 the LexApr from pSZB708 using KpnI and XhoI. We then cloned those digested pieces into  
846 KpnI-BamHI digested pRS314 to generate pSZB774.

847

848 *Generation of a vector containing wtf4<sup>poison\*</sup>-GFP under the control of a  $\beta$ -estradiol inducible*  
849 *promoter:* We amplified the beginning of *wtf4<sup>poison\*</sup>* (using oligos 1419+1021) from pSZB585 (see  
850 above). We amplified *wtf4<sup>poison\*</sup>* (using oligos 1072+997) from pSZB647 (see above) and GFP+  
851 the *ADH1* terminator (using oligos 998+1040) from pSZB585 (see above). We then used  
852 overlap PCR (using oligos 1419+1040) to join the three pieces. We digested the cassette with



853 XhoI and BamHI and also digested the LexApr from pSZB668 (see above) using KpnI and XhoI.  
854 We ligated the digested *wtf4<sup>poison\*</sup>-GFP* cassette and the LexApr into KpnI-BamHI-digested-  
855 pSZB668 to generate pSZB786.

856

### 857 **Generation of the mEos3.1 tagged *wtf4* alleles**

858 *Generation of vector containing *wtf4<sup>poison</sup>-mEos3.1* under the control of a galactose inducible*  
859 *promoter:* We used Golden Gate assembly (New England Biolabs) to insert the *wtf4<sup>poison</sup>*  
860 sequence that had been codon-optimized for *S. cerevisiae* (ordered from Addgene) into the  
861 BsaI-site of V08, a Gal-inducible vector with mEos3.1 and a rigid structure linker made up of a  
862 quadruple repeat of amino acids EAAAR [4x(EAAAR)] (Khan et al., 2018). This generated  
863 plasmid rhx1389.

864

865 *Generation of vector containing *wtf4<sup>antidote</sup>-mEos3.1* under the control of a galactose inducible*  
866 *promoter:* We used Gibson assembly (New England Biolabs) using oligos rh1282+rh1283 to  
867 insert a sequence that encodes the 45 amino acids of the codon-optimized *wtf4* exon1 into the  
868 AarI-digested rhx1389 (see above) to create pSZB1120.

869

870 *Generation of a vector containing *wtf4<sup>poison</sup>-mEos3.1* under the control of a  $\beta$ -estradiol inducible*  
871 *promoter:* We amplified *wtf4<sup>poison</sup>-mEos3.1* with a *CYC1* terminator sequence (using oligos  
872 1466+964) from rhx1389 (see above) and digested with BamHI. We then ligated the cassette  
873 into the BamHI site of pSZB668 to generate pSZB732.

874

875 *Generation of a vector containing *wtf4<sup>antidote</sup>-mEos3.1* under the control of a  $\beta$ -estradiol inducible*  
876 *promoter:* We amplified the *wtf4<sup>antidote</sup>-mEos3.1* with a *CYC1* transcriptional terminator (using  
877 oligos 1465+964) from pSZB1120 (see above) and digested with BamHI. We then ligated the  
878 cassette into the BamHI site of pSZB670 (see above) to generate pSZB756.

879

880 *Generation of a vector containing *wtf4<sup>antidote</sup>* under the control of  $\beta$ -estradiol inducible promoters:*  
881 We digested the LexApr-*wtf4<sup>antidote</sup>-CYC1* terminator construct out of pSZB589 (see above) and  
882 ligated it into pRS316 (Sikorski et al., 1989) to create pSZB782.

883

### 884 **DAmFRET**

885 We induced samples of SZY2072, SZY2070, SZY2159, and SZY2059, with  $\beta$ -estradiol as  
886 described above. We then aliquoted these induced samples into a 96-well plate. We then  
887 partially photoconverted the mEos3.1 protein by exposing the plate, while shaking at 800 RCF,  
888 to 405 nm illumination for 25 mins using an OmniCure® S1000 fitted with a 320–500 nm (violet)

889 filter and a beam collimator (Exfo), positioned 45 cm above the plate. This exposure yielded a  
890 total photo dose of 16.875 J/cm<sup>2</sup>. This photo dose reproducibly achieves the maximum  
891 fluorescence of the acceptor (red) form of mEos3.1 while minimizing photobleaching of the  
892 green form (*Khan et al., 2018*). For Figure 2-figure supplement 3C, we assayed the  
893 photoconverted samples on a Bio-Rad ZE5 cell analyzer with high throughput automation. We  
894 analyzed 20  $\mu$ L of each sample to collect approximately 100,000 events per well. We excited  
895 the mEos3.1 donor (green form) with a 488 nm laser at 100 mW and collected with 525/35 nm  
896 and 593/52 nm bandpass filters, respectively. We excited the acceptor fluorochrome with a 561  
897 nm laser at 50 mW and collected with a 589/15 nm bandpass filter. We performed manual  
898 compensation on-instrument at acquisition. We used DeNovo FCS Express for data analysis  
899 and visualization and calculated ratiometric FRET as FRET/acceptor signals.

900

### 901 **Fission Yeast microscopy**

902 For imaging during gametogenesis (Figure 1C-D, 1G, Figure 1-figure supplement 1B, Figure 1-  
903 figure supplement 2A and 2C), we crossed the two haploid yeast strains to generate  
904 heterozygous diploids as previously described (*Nuckolls et al., 2017*). We placed the diploids on  
905 sporulation agar (SPA, 1% glucose, 7.3 mM KH<sub>2</sub>PO<sub>4</sub>, vitamins, agar) for 2-3 days. We then  
906 scraped the cells off of the SPA plates and onto slides for imaging.

907

908 For vegetatively growing samples (Figure 1E-F, Figure 1-figure supplement 3B and 3D), we  
909 induced gene expression with  $\beta$ -estradiol as described above. If we used vacuole staining, we  
910 took 1 mL of the induced culture, spun to pellet, and resuspended in 1 mL of 10 mM HEPES  
911 buffer, pH 7.4, containing 5% glucose with 100  $\mu$ M CellTracker<sup>TM</sup> Blue CMAC (Component B;  
912 Invitrogen C2110). We incubated these cells at room temperature for 30 minutes. We then  
913 washed with YEL media and imaged. For imaging, we used the LSM-780 (Zeiss) microscope  
914 with a 40x C-Apochromat water-immersion objective (NA 1.2) in photon-counting channel mode.  
915 For GFP, we used 488 nm excitation and collected through a 491–552 bandpass filter. For  
916 mCherry, we used 561 nm excitation and collected through a 572 longpass filter. For YFP, we  
917 used 514 nm excitation and collected through a 500-589 nm bandpass filter. For CMAC, we  
918 used 405 nm excitation and collected through a 411-509 nm bandpass filter. Brightness and  
919 contrast are not the same for all images. We analyzed at least 20 cells for each strain and  
920 chose a representative image. For experiments assaying meiosis/gametogenesis, we used at  
921 least two independent progenitor diploids; if cells were imaged during vegetative growth, we  
922 imaged at least three different starting cultures.

923

924 We carried out Pearson correlation analysis (*Adler and Parmryd, 2010*) as previously described  
925 (*Slaughter et al., 2013*). Briefly, we drew a segmented line (width of two pixels) throughout the  
926 spore, randomly covering as much of the spore as we could. We then used an in-house custom  
927 written plugin for ImageJ (<https://imagej.nih.gov/ij/>) to generate a two-color line profile. We  
928 calculated the Pearson correlation of the line profile with varying degrees of shifts in at least  
929 eight spores or six vegetatively growing cells per sample. We then combined and averaged the  
930 trajectories with standard error.

931  
932 To quantify nuclear size, we calculated the full width at half maximum of the fluorescence  
933 intensity of RFP. We quantified 42 spores that inherited *wtf4-GFP* and 19 that did not, all from a  
934 *wtf4-GFP/ade6+* heterozygote after 2 days on SPA media. We excluded any nuclei that  
935 appeared to have already fragmented.

936  
937 For the nuclear timelapse (Figure 1-figure supplement 4), we grew diploid cultures to saturation  
938 at 32°C overnight in YEL media. We then plated 100 µL of the cultures on a SPA plate, cut a  
939 circle punch of agar from the plate, and placed this punch upside down (cells facing down) in a  
940 35 mm glass bottom poly-D-lysine coated dish (MatTek corporation). We placed grease around  
941 the edge of the MaTeK dish and a moist kim wipe inside to control for humidity. We then imaged  
942 the cells using the Nikon Ti Eclipse coupled to a Yokogawa CSU W1 Spinning Disk, using the  
943 60x oil objective, acquiring images every ten minutes. Here, we excited RFP at 561nm and  
944 collected its emission through a 605-70 nm bandpass filter.

945  
946 For the gametogenesis timelapse (Figure 1-figure supplement 1B), we grew diploid cultures to  
947 saturation at 32°C overnight in YEL media. The next day, we diluted 100 µL of the saturated  
948 diploid culture into 5 mLs of PM media (20 mLs of 50x EMM salts, 20 ml 0.4 M Na<sub>2</sub>HPO<sub>4</sub>, 25 mL  
949 20% NH<sub>4</sub>Cl, 1 mL 1000x Vitamins, 100 µL 10,000x mineral stock solution, 3 g potassium  
950 hydrogen phthalate, 950 mL ddH<sub>2</sub>O, 25 mL of sterile 40% glucose after autoclaving,  
951 supplemented with 250 mg/L uracil). We grew the PM culture overnight at 32°C. The next day,  
952 we spun to pellet and resuspended the pellet in PM-N media (20 mLs of 50x EMM Salts, 20 mL  
953 0.4 M Na<sub>2</sub>HPO<sub>4</sub>, 1 mL 1000x Vitamins, 100 µL 10,000x mineral stock solution, 25 mL of sterile  
954 40% glucose after autoclaving, supplemented with 250 mg/L uracil, volume up to 1 L with  
955 ddH<sub>2</sub>O). We shook the PM-N cultures for 4 hours at 28°C. Then, we took 100 µL of the PM-N  
956 culture and mixed it with 100 µL of lectin (Sigma). We took 150 µl of this mixture and added it to  
957 a 35 mm glass bottom poly-D-lysine coated dish (MatTek corporation). We waited five minutes  
958 to allow the cells to adhere. We then added 3 mLs of fresh PM-N to the dish (protocol modified  
959 from *Klutstein et al., 2015*). We imaged using a Zeiss Observer.Z1 wide-field microscope with a

960 63x (1.2 NA) oil-immersion objective and collected the emission onto a Hamamatsu ORCA  
961 Flash 4.0 using  $\mu$ Manager software. We acquired the mCherry with BP 530–585 nm excitation  
962 and LP 615 emission, using an FT 600 dichroic filter, acquiring images every 10 minutes.

963

### 964 **Budding yeast microscopy**

965 For all budding yeast images except for the two experiments described below, we induced  
966 samples as described above and imaged on an LSM-780 (Zeiss) microscope, with a 40x C-  
967 Apochromat water-immersion objective (NA 1.2) in photon-counting channel mode. For GFP  
968 and mCherry, we used the same conditions as we did in *S. pombe*. For mCardinal, we used 633  
969 nm excitation and collected through a 632-696 nm bandpass filter. Brightness and contrast are  
970 not the same for all images. We imaged at least 20 cells from at least three starting cultures and  
971 chose a representative image for each figure.

972

973 For imaging *vps1* $\Delta$  cells (Figure 5D) and the nuclear timelapse (Figure 2-figure supplement 2A-  
974 B), we placed samples in a Millipore Onix 2 Cellasic system to allow for a constant flow of  
975 media. We initiated flow of inducing media (SC with 500 nM *b*-estradiol for *vps1* $\Delta$  and SC  
976 galactose for the nuclear timelapse) and took images every 10 minutes. We used a Perkin  
977 Elmer Ultraview Vox spinning disc microscope with a Hamamatsu EMCCD (C9100-23B) with a  
978 40x C-Apochromat water-immersion objective (NA 1.2). We collected GFP and mCherry with  
979 488 and 651 nm excitation as above but collected GFP through a 525-50 nm bandpass filter  
980 and mCherry through a 615-70 nm bandpass filter. We had two independent starting cultures for  
981 the sample. We chose a representative cell and timepoint. Brightness and contrast are not the  
982 same for all images.

983

984 To quantify nuclear size (Figure 2-figure supplement 2C), we calculated the full width at half  
985 maximum of the fluorescence intensity of RFP per cell. We quantified at the beginning of the  
986 timelapse (early) and 14 hours into the timelapse (late). We quantified 72 *Wtf4*<sup>poison</sup>-GFP  
987 expressing cells and 65 wild-type cells at the early timepoint. We quantified 62 *Wtf4*<sup>poison</sup>-GFP  
988 expressing cells and 79 wild-type cells at the later timepoint.

989

### 990 **Acceptor Photobleaching FRET in *S. cerevisiae***

991 We carried out acceptor photobleaching FRET with  $\beta$ -estradiol induced (described above)  
992 SZY1954 (wild type) using a LSM-780 (Zeiss) microscope, with a 40x C-Apochromat water-  
993 immersion objective (NA 1.2) in photon-counting channel mode. For *vps1* $\Delta$  cells (SZY2570), we  
994 used a Perkin Elmer Ultraview Vox spinning disc microscope with a Hamamatsu EMCCD

995 (C9100-23B) with 488 and 561 nm excitation. For both samples, we photobleached the acceptor  
996 (mCherry) with 561 nm excitation (for bleaching images, see Figure 2-figure supplement 2F for  
997 wildtype and Figure 5- figure supplement 3A for *vps1Δ*). We analyzed 22 wildtype and 76 *vps1Δ*  
998 cells.

999

#### 1000 **Fluorescence Recovery After Photobleaching half-FRAP of Wtf4 Aggregates**

1001 *In S. cerevisiae*: We induced SZY1954 with  $\beta$ -estradiol as described above and mounted into a  
1002 lectin-coated 35 mm glass bottom poly-D-lysine coated dish (MatTek corporation) and imaged  
1003 on a Perkin Elmer Ultraview Vox spinning disc with a Hamamatsu EMCCD (C9100-23B). We  
1004 excited GFP with a 488 nm laser and collected its emission through a 100x alpha plan  
1005 Achromat objective (NA=1.4) and a 525-50nm bandpass filter. For each cell (n=10), we  
1006 bleached half of the visible aggregate. We then acquired recovery images every second for  
1007 three minutes total time.

1008

1009 *In S. pombe*: We placed SZY1142/SZY1049 heterozygous diploids on SPA plates for 2 days.  
1010 We then scraped the sample off of the SPA plates into a 35 mm glass bottom poly-D-lysine  
1011 coated dish (MatTek corporation) and carried out half-FRAP as above (n=10 spores), except  
1012 that recovery images were then acquired for three minutes total time.

1013

#### 1014 **Electron Microscopy**

1015 We made 50 mL saturated overnight cultures of SZY1821, SZY1952, SZY1954, and SZY2731  
1016 in SC media lacking histidine, tryptophan, and uracil (to select for retention of the plasmids). The  
1017 next day, we diluted 10 mLs of the saturated cultures into 90 mLs of the same media with 500  
1018 nM  $\beta$ -estradiol. We shook these cultures for four hours at 30°C, reaching log phase. We then  
1019 pelleted the yeast cells by filtering and carried out high pressure freezing with the Leica ICE  
1020 system (Leica Biosystems). We further processed the frozen cell pellets by freeze substitution  
1021 (FS) using acetone containing 0.2% uranyl acetate (UA) and 2% H<sub>2</sub>O was used as FS medium.  
1022 The FS program was -90° to -80° over 70 hrs, -80° to -60° over 6 hrs, -60° for 5 h, -60° to  
1023 -50° over 6 hrs, and -50° to -20°C over 4 hrs. After washing extensively with acetone, we then  
1024 infiltrated, embedded and polymerized the samples into resin.

1025

1026 For Immuno-EM, we used HM-20 resin. We cut 60 nm sections with a Leica Ultra microtome  
1027 (Leica UC-6) and picked up onto a carbon-coated 150 mesh nickel grid. The grids were labeled  
1028 with anti-GFP primary antibody (a gift from M. Rout, Rockefeller University, New York, NY) and  
1029 12 nm colloidal gold goat anti-Rabbit secondary antibody (Jackson Immuno Research



1030 Laboratories, Inc). After immuno labeling, we post-stained the samples with 1% UA for 3  
1031 minutes. We acquired images using a FEI Tecnai Biotwin electron microscope. For non-  
1032 immuno-EM, we used Epon resin to better maintain morphology, but the rest of the procedure  
1033 was the same. We analyzed the tomographs of at least 10 cells per condition.  
1034  
1035 For quantification purposes, we also used completed array tomography. For array tomography,  
1036 we cut 60 nm serial sections with a Leica Ultra microtome (UC-6) using an Ultra 35 Jumbo  
1037 diamond knife (Diatome) and picked up on ITO coated coverslips using the ASH-100 Advanced  
1038 Substrate Holder (RMC Boeckeler). We post-stained serial sections with Sato's triple lead stain  
1039 for two minutes, 4% UA in 70% methanol for two minutes, and Sato's lead stain again for two  
1040 minutes. The coverslips were coated with 5 nm of carbon and imaged in a Zeiss Merlin Gemini  
1041 2 SEM with 4QBSD detector at 10 kV and 700 pA using Atlas 5 Array Tomography software  
1042 (Fibics). The obtained dataset was aligned with Midas of the IMOD software package (*Kremer*  
1043 *et al.*, 1996) and manually quantified. For better visualization, an image series of an individual  
1044 yeast cell was cropped and further aligned with registration tools in Image J.  
1045  
1046 For model building, the segmentation was done based on intensity and known organelle  
1047 structure with Microscopy Image Browser (*Belevich et. al*, 2016) and with IMOD. We used Amira  
1048 (Thermo Fisher Scientific) software for model rendering and visualization.  
1049  
1050 Further quantification of mitochondrial volumes was performed on selected cells after training a  
1051 Unet (*Ronneberger et al.*, 2015). Hand annotation of training data was performed in Fiji. A  
1052 suite of internally developed Fiji plugins, macros and CherryPy scripts called DeepFiji (see  
1053 below) sent training data to a pair of in-house NVIDIA Tesla-equipped deep learning machines  
1054 running Tensorflow. Representative cells were selected, and segmented images inferred using  
1055 the same macros and deep learning machines before being aligned using a StackReg variant.  
1056 Mitochondrial volumes were quantified in Fiji using the 3D Segmentation tools.

1057

### 1058 **DeepFiji training**

1059 DeepFiji is a suite of macros and plugins in Fiji, Python, and CherryPy (a Python web  
1060 framework) that enable end users on any machine with a reasonable amount of RAM to request  
1061 deep learning training and inference on a remote deep learning box as long as both machines  
1062 have access to a shared file system.

1063

1064 First, a user selects example sub-images that span the realm of potential objects, background  
1065 levels and signal levels. Manual annotations are made using Fiji's Region of Interest (ROI) tools

1066 and manager, and individual ROI files are saved for each image (in our case the ROIs were  
1067 each individual cell and the total of the mitochondria inside). A user chooses a small subset of  
1068 the annotated image/ROI pairs to be used as a validation set, while the remainder becomes the  
1069 training set. For each image, two binary channels are added from the associated ROIs: a mask  
1070 channel and an outline channel. The mask channel has all pixels contained within an ROI  
1071 painted true, while the outline channel only paints true the pixels that were in the ROI's outline.  
1072 As the training network expects standard image sizes and runs more efficiently with smaller  
1073 images, the macro next makes image stacks for both annotated training and validation images  
1074 that break the original images up into 512x512 sub-images with 50% overlap between sub-  
1075 images. For the training set, it also applies a series of random rotations and translations to help  
1076 the neural network generalize. Both the validation and new training images are saved to a  
1077 shared file system and the deep learning boxes are notified to begin processing through a call to  
1078 a webserver running on the box. The sub-image size, file location, and other parameters are  
1079 configurable by the user at the time of running.

1080  
1081 For our in-house system, the deep learning boxes are running ubuntu with NVIDIA Tesla boards  
1082 and configured with Tensorflow 1.13.1 and CUDA 10.0. CherryPy is configured to listen for web  
1083 calls on each and, once initiated from a user, begins processing files from the selected directory  
1084 by calling trainer.py. The trainer first finds the standard deviation (STDEV) and mean (MEAN) of  
1085 the non-zero pixel intensities and stores those values. The training, validation, and all future  
1086 inference sets will be processed by  $(Intensity-MEAN)/STDEV+0.5$  first to keep numbers roughly  
1087 between 0 and 1. The model used is a modified Unet(ref): convolutional layers are alternated  
1088 with max pool layers, doubling the channel depth at each layer while halving the resolution. The  
1089 final layer is 32x32x512. At each convolutional layer the image is passed through a leaky  
1090 rectified linear unit. Convolutional up-sampling brings the image back to its original resolution  
1091 where it is passed through a tanh() function and the mean square error is calculated with  
1092 respect to the ground truth image for back-propagation. Every 100th iteration of the training is  
1093 applied to the validation set and the images are visualized using TensorBoard (which opens  
1094 automatically on the user's host computer). Training proceeds with the learning rate adjusting  
1095 over time, until 2200 iterations have passed at which point most networks have either  
1096 converged or never will.

1097  
1098 Once training is completed, and a reasonable iteration point is found in TensorBoard, the user  
1099 can run Inferer.ijm in Fiji on their host machine to apply their model to a new dataset. Inferer will  
1100 similarly parse images into sub-images, and contact a deep learning box to initiate processing.



1101 Once processing is complete the user can run a second script to blank out border regions and  
1102 de-window their images. The output outline and mask channels are ranged from 0-1 and  
1103 represent probabilities. Typically, thresholding pixel values above 0.5 in the mask channel will  
1104 suffice for finding objects of interest. However, in cases with frequent object touching, one can  
1105 subtract the outline probability from the mask.

1106  
1107 If consistent mistakes are found in the inferred data, the user can annotate them properly using  
1108 Fiji and use Retrain.ijm to retrain the network using the new data together with the old to  
1109 generate a new training set. Retraining starts from the original model so that it does not have to  
1110 relearn from scratch.

1111  
1112 Plugins necessary to run in Fiji are available from the Stowers update site within Fiji. Macros,  
1113 python code, and CherryPy configurations are available at  
1114 <https://github.com/cwood1967/DeepFiji>.

1115

### 1116 **Genetic screen for suppressors of Wtf4<sup>antidote</sup> function in *S. cerevisiae***

1117 *Screen design:* Two separate plasmids carrying galactose inducible Wtf4 proteins [(Wtf4<sup>poison</sup>-  
1118 GFP (pSZB464) and Wtf4<sup>antidote</sup>-mCherry (pSZB1005)] were transformed into the *MATa* haploid  
1119 *S. cerevisiae* deletion collection (purchased from Open Biosystems) using lithium acetate  
1120 protocol (*Gietz, et al., 1995*). The transformed collection was then spot inoculated on SC and  
1121 SC galactose media lacking leucine and uracil. As a control, a strain expressing the galactose  
1122 inducible poison and antidote in a wild-type background was used for comparison. We grew the  
1123 plates for three days at 30°C, imaged them using the Splmager (S&P Robotics), and manually  
1124 scored growth. For the antidote-only screen, we transformed the galactose driven Wtf4<sup>antidote</sup>-  
1125 mCherry (pSZB1005) plasmid into the 106 hits from the first screen and scored them as  
1126 mentioned above.

1127

1128 *Confirmation of hits:* The initial screen identified 250 strains that grew poorly on inductive media.  
1129 To confirm that this poor growth was due to the Wtf4 proteins and not due to the background  
1130 strain being sick or a poor grower on galactose media in general, we completed a follow-up  
1131 screen. We transformed the 250 strains we identified as “poor growers” with empty [*URA3*] and  
1132 [*LEU2*] vectors and assayed the strains as above to identify those that grew poorly on galactose  
1133 media independent of *wtf4* gene expression. We found 106 strains that passed this secondary  
1134 screen, which we then called hits. We imaged this 106 strains after a short galactose induction  
1135 (~4) to ensure we saw Wtf4 protein

1136

1137 *Analysis:* To look for enriched gene ontology terms in the hits from the screen, we used the  
1138 PANTHER overrepresentation Test (*Thomas et al., 2003; Thomas et al., 2006*). The  
1139 background list we used for the analysis was the list of *MATa* deletion collection strains that we  
1140 successfully transformed with our plasmids of interest (n= 4793). We used Fisher's Exact test  
1141 and corrected with false discovery rate. We imaged the cells as described above for Gal-  
1142 inductions, but we added 80 mg/L adenine to the inducing media to circumvent any potential  
1143 autofluorescence introduced by the adenine auxotrophy.

1144

#### 1145 **Acknowledgments**

1146 We thank Alejandro Rodríguez Gama, Julie Cooper, Li-Lin Du, Snezhana Oliferenko, Risa Mori,  
1147 and Frank Shewmaker for strains or plasmids. We thank Kausik Si for valuable advice on the  
1148 project, Sue Jaspersen for advice and reagents, and Xia Zhao for assistance in electron  
1149 microscopy. Original data underlying this manuscript can be accessed from the Stowers Original  
1150 Data Repository at <http://www.stowers.org/research/publications/libpb>. This work was performed  
1151 to fulfill, in part, requirements for NLN's thesis research in the Graduate School of the Stowers  
1152 Institute for Medical Research. This work was supported by The Stowers Institute for Medical  
1153 Research (SEZ, RH); the Searle Award (SEZ); National Institutes of Health (NIH)  
1154 R00GM114436 and DP2GM132936 (SEZ); NIH Director's Early Independence Award DP5-  
1155 OD009152 (RH); National Cancer Institute of the NIH under award number F99CA234523  
1156 (MABN). Eunice Kennedy Shriver National Institute Of Child Health & Human Development of  
1157 the NIH under Award Number F31HD097974 (NLN). The funders had no role in study design,  
1158 data collection and analysis, or manuscript preparation. The content is solely the responsibility  
1159 of the authors and does not necessarily represent the official views of the funders.

1160

#### 1161 **Conflicts of interest**

1162 NLN, MABN, SEZ: Inventor on Patent application based on this work. Patent application serial  
1163 62/491,107. The other authors declare that no competing interests exist.

1164

#### 1165 **References:**

- 1166 1.J. Adler and I. Parmryd, Quantifying colocalization by correlation: The Pearson correlation  
1167 coefficient is superior to the Mander's overlap coefficient. *Cytometry* **77A**: 733-742 (2010).
- 1168 2.T. Akera, L. Chmátal, E. Trimm, K. Yang, C. Aonbangkhen, D.M. Chenoweth, *et al.*, Spindle  
1169 asymmetry drives non-Mendelian chromosome segregation. *Science* **358**(6363):668-72  
1170 (2017).

- 1171 3.M. Arrasate, S. Mitra, E.S. Schweitzer, M.R. Segal, S. Finkbeiner, Inclusion body formation  
1172 reduces levels of mutant huntingtin and the risk of neuronal death. *Nature*  
1173 **431**(7010):805-810 (2004).
- 1174 4.K. Bagola, T. Sommer, Protein quality control: on IPODs and other JUNQ. *Current Biology*  
1175 **18**(21):R1019-21 (2008).
- 1176 5.H. Bauer, N. Véron, J. Willert, and B.G. Herrmann, The t-complex-encoded guanine  
1177 nucleotide exchange factor Fgd2 reveals that two opposing signaling pathways promote  
1178 transmission ratio distortion in the mouse. *Genes & development* **21**(2):143–147 (2007).
- 1179 6.H. Bauer, S. Schindler, Y. Charron, J. Willert, B. Kusecek, B.G. Herrmann, The nucleoside  
1180 diphosphate kinase gene *Nme3* acts as quantitative trait locus promoting non-Mendelian  
1181 inheritance. *PLOS Genetics* **8**(3):e1002567. (2012)
- 1182 7.I. Belevich, M. Joensuu, D. Kumar, H. Vihinen and E. Jokitalo, Microscopy Image Browser:  
1183 A platform for segmentation and analysis of multidimensional datasets. *PLOS Biology*  
1184 **14**(1):e1002340 (2016).
- 1185 8.M.A. Bravo Núñez, I.M. Sabbarini, M.T. Eickbush, Y. Liang, J.J. Lange, A.M. Kent, S.E.  
1186 Zanders, Dramatically diverse *S. pombe wtf* meiotic drivers all display high gamete-killing  
1187 efficiency. *PLOS Genetics* (2020) in press.
- 1188 9.M.A.Bravo Núñez, J.J. Lange, S.E. Zanders, A suppressor of a *wtf* poison-antidote meiotic  
1189 driver acts via mimicry of the driver’s antidote. *PLOS Genetics* **14**(11):e1007836 (2018).
- 1190 10.M.A. Bravo Núñez, N. Nuckolls, S.E. Zanders, Genetic Villains: Killer Meiotic  
1191 Drivers. *Trends in Genetics* **34**(6):424-433. (2018).
- 1192 11.A. Burt and A. Crisanti, Gene drive: Evolved and Synthetic. *ACS Chem. Biol.* **13**:343-346  
1193 (2018).
- 1194 12.A. Burt, Heritable strategies for controlling insect vectors of disease. *Philosophical*  
1195 *Transactions of the Royal Society B* **369**(1645):20130432 (2014).
- 1196 13.A. Burt, R. Trivers, Genes in conflict: the biology of selfish genetic elements. (Belknap  
1197 Press of Harvard University Press, Cambridge, Mass., 2006), pp. viii, 602 p., 608 p. of  
1198 plates.
- 1199 14.D. Carmona-Gutierrez, T. Eisenberg, S. Buttner, C. Meisinger, G Kroemer F Madeo,  
1200 Apoptosis in yeast: triggers, pathways, subroutines. *Cell Death and Differentiation* **17**:763–  
1201 773 (2010).
- 1202 15.J. Chen, J. Ding, Y.Ouyang, H. Du, J. Yang, K. Cheng, *et al.*, A triallelic system of *S5* is a  
1203 major regulator of the reproductive barrier and compatibility of indica–japonica hybrids in

- 1204 rice. *Proceedings of the National Academy of Sciences of the United States of America*  
1205 **105**(32):11436-41. (2008).
- 1206 16.B. Chen, M. Retzlaff, T. Roos, J. Frydman, Cellular Strategies of Protein Quality Control.  
1207 *Cold Spring Harb Perspectives in Biology* **3**(8):a004374 (2011).
- 1208 17.M. Coelho, S.J. Lade, S. Alberti, T. Gross, I.M. Tolić, Fusion of protein aggregates  
1209 facilitates asymmetric damage segregation. *PLOS Biology* **12**(6):e1001886 (2014).
- 1210 18.M.R. Cookson and M. van der Brug, Cell systems and the toxic mechanism(s) of alpha-  
1211 synuclein. *Exp Neurol.* **209**(1):5-11. (2007).
- 1212 19.J.F. Crow, Why is Mendelian segregation so exact? *Bioessays* **13**:305-312 (1991).
- 1213 20.H.J. Dalstra, K. Swart, A.J. Debets, S.J. Saupe, R.F. Hoekstra, Sexual transmission of the  
1214 [Het-S] prion leads to meiotic drive in *Podospora anserina*. *Proceedings of the National*  
1215 *Academy of Sciences of the United States of America* **100**(11):6616-21. (2003).
- 1216 21.H.J. Dalstra, R. van der Zee, K. Swart, R.F. Hoekstra, S.J. Saupe, A.J. Debets, Non-  
1217 mendelian inheritance of the HET-s prion or HET-s prion domains determines the het-S  
1218 spore killing system in *Podospora anserina*. *Fungal Genetics and Biology* **42**(10):836-47  
1219 (2005).
- 1220 22.S.K. Dasgupta, S. Jain, D. Kaushal and A.K. Tyagi, Expression systems for study of  
1221 mycobacterial gene regulation and development of recombinant BCG vaccines. *Biochem.*  
1222 *Biophys. Res. Commun.* **246**(3):797-804 (1998).
- 1223 23.R.K. Dawe, E.G. Lowry, J.I. Gent, M.C. Stitzer, K.W. Swentowsky, D.M. Higgins, *et al.*, A  
1224 kinesin-14 motor activates neocentromeres to promote meiotic drive in maize. *Cell*  
1225 **173**(4):839-50.e18.
- 1226 24.J.P. Didion, A.P. Morgan, A.M. Clayshulte, R.C. McMullan, L. Yadgary, P.M. Petkov, *et al.*,  
1227 A multi-megabase copy number gain causes maternal transmission ratio distortion on  
1228 mouse chromosome 2. *PLOS Genetics* **11**(2):e1004850. (2015).
- 1229 25.K.A. Dyer, B. Charlesworth, J. Jaenike, Chromosome-wide linkage disequilibrium as a  
1230 consequence of meiotic drive. *Proceedings of the National Academy of Sciences*  
1231 *United States of America* **104**(5):1587–1592 (2007).
- 1232 26.M.T. Eickbush, J.M. Young, S.E. Zanders, Killer Meiotic Drive and Dynamic Evolution of  
1233 the *wtf* Gene Family. *Molecular Biology and Evolution* **36**(6):1201–1214 (2019).
- 1234 27.R. Elble, A simple and efficient procedure for transformation of yeasts. *Biotechniques*  
1235 **13**(1):18-20 (1992).
- 1236 28.A.H. Enyenihi and W.S. Saunders, Large-Scale Functional Genomic Analysis of  
1237 Sporulation and Meiosis in *Saccharomyces cerevisiae*. *Genetics* **163**(1):47-54 (2003).

- 1238 29.K.M. Esvelt, A.L. Smidler, F. Catteruccia, G.M. Church, Concerning RNA-guided gene  
1239 drives for the alteration of wild populations. *eLife* **3**:e03401 (2014).
- 1240 30.J.M. Friederichs, S. Ghosh S, C.J. Smoyer, S. McCroskey, B.D. Miller, K.J. Weaver, K.M.  
1241 Delventhal, J. Unruh, B.D. Slaughter, S.L. Jaspersen, The SUN protein Mps3 is required for  
1242 spindle pole body insertion into the nuclear membrane and nuclear envelope homeostasis.  
1243 *PLOS Genetics* **7**(11):e1002365 (2011).
- 1244 31.B. Fuchs, E. Mylonakis, Our paths might cross: the role of the fungal cell wall integrity  
1245 pathway in stress response and cross talk with other stress response pathways. *Eukaryotic*  
1246 *Cell* **8**(11):1616-25. (2009).
- 1247 32.V.M. Gantz, N. Jasinskiene, O. Tatarenkova, A. Fazekas, V.M. Macias, E. Bier, A. James,  
1248 Highly efficient Cas9-mediated gene drive for population modification of the malaria vector  
1249 mosquito *Anopheles stephensi*. *Proceedings of the National Academy of Sciences of the*  
1250 *United States of America* **112**(49):E6736-43 (2015).
- 1251 33.R. García, J.M. Rodríguez-Peña, C. Bermejo, C. Nombela, J. Arroyo, The high osmotic  
1252 response and cell wall integrity pathways cooperate to regulate transcriptional responses to  
1253 zymolyase-induced cell wall stress in *Saccharomyces cerevisiae*. *The Journal of Biological*  
1254 *Chemistry* **284**(16):10901-1. (2009).
- 1255 34.R.D. Gietz, R.H. Schiestl, A.R. Willems, R.A. Woods, Studies on the transformation of intact  
1256 yeast cells by the LiAc/SS-DNA/PEG procedure. *Yeast* **11**(4):355-60 (1995).
- 1257 35.C. Grey, F. Baudat, D. de Massy, PRDM9, a driver of the genetic map. *PLOS Genetics*  
1258 **14**(8):e1007479 (2018).
- 1259 36.P. Grognet, H. Lalucque, F. Malagnac, P. Silar, Genes that bias Mendelian segregation.  
1260 *PLOS Genetics* **10**:e1004387 (2014).
- 1261 37.J. Guan, P.E. Stromhaug, M.D. George, P. Habibzadegah-Tari, A. Bevan, W.A. Dunn Jr,  
1262 D.J. Klionsky, Cvt18/Gsa12 is required for cytoplasm-to-vacuole transport, pexophagy, and  
1263 autophagy in *Saccharomyces cerevisiae* and *Pichia pastoris*. *Molecular Biology of the Cell*  
1264 **12**(12):3821-38 (2001).
- 1265 38.M.F. Hammer, J. Schimenti, L.M. Silver, Evolution of mouse chromosome 17 and the origin  
1266 of inversions associated with t haplotypes. *Proceedings of the National Academy of*  
1267 *Sciences of the United States of America* **86**(9):3261–3265 (1989).
- 1268 39.T.M. Hammond, D.G. Rehard, H. Xiao, P.K. Shiu, Molecular dissection of *Neurospora* spore  
1269 killer meiotic drive elements. *Proceedings of the National Academy of Sciences of the*  
1270 *United States of America* **109**(30):12093-8 (2012).

- 1271 40.C. He, H. Song, T. Yorimitsu, I. Monastyrska, W.L. Yen, J.E. Legakis, D.J. Klionsky,  
1272 Recruitment of Atg9 to the preautophagosomal structure by Atg11 is essential for selective  
1273 autophagy in budding yeast. *Journal of Cell Biology* **175**(6):925–935 (2006).
- 1274 41.B. Herrmann, B. Koschorz, K. Wertz, *et al.*, A Protein Kinase Encoded by the t-Complex  
1275 Responder Gene Causes Non-Mendelian Inheritance. *Nature* **402**(6758):141-146. (1999).
- 1276 42.S.M. Hill, S. Hanzén, T. Nyström, Restricted access: spatial sequestration of damaged  
1277 proteins during stress and aging. *EMBO Reports* **18**(3):377-391 (2017).
- 1278 43.S.M. Hill, X. Hao, J. Gronvall, S. Spinkings-Nordby, *et al.*, Asymmetric Inheritance of  
1279 Aggregated Proteins and Age Reset in Yeast Are Regulated by Vac17-Dependent Vacuolar  
1280 Functions. *Cell Reports* **16**(3):826-38 (2016).
- 1281 44.C.S. Hoffman, V. Wood, P.A. Fantes, An Ancient Yeast for Young Geneticists: A Primer on  
1282 the *Schizosaccharomyces pombe* Model System. *Genetics* **201**(2):403-423 (2015)
- 1283 45.W. Hu, Z. Jiang, F. Suo, J. Zheng, W. He, L. Du, A large gene family in fission yeast  
1284 encodes spore killers that subvert Mendel's law. *eLife* **6**:e26033 (2017).
- 1285 46.C. Janke, M. Magiera, N. Rathfelder, C. Taxis, S. Reber, H. Maekawa, *et al.*, A versatile  
1286 toolbox for PCR-based tagging of yeast genes: new fluorescent proteins, more markers and  
1287 promoter substitution cassettes. *Yeast* **21**:947–962 (2004).
- 1288 47.C. Jin, SK Kim, SD Willis, KF Cooper, The MAPKKs Ste11 and Bck1 jointly transduce the  
1289 high oxidative stress signal through the cell wall integrity MAP kinase pathway. *Microb Cell*  
1290 **2**(9):329–342 (2015).
- 1291 48.B. Johnson, D. Snead, J.J. Lee, J.M. McCaffery, J. Shorter, A.D. Gitler, TDP-43 is  
1292 intrinsically aggregation-prone, and amyotrophic lateral sclerosis-linked mutations  
1293 accelerate aggregation and increase toxicity. *The Journal of Biological Chemistry*  
1294 **284**(30):20329-39 (2009).
- 1295 49.D. Kaganovich, R. Kopito, J. Frydman, Misfolded proteins partition between two distinct  
1296 quality control compartments. *Nature* **454**(7208):1088–1095 (2008).
- 1297 50.J.F.R. Kerr, A.H. Wyllie, A.R. Currie, Apoptosis: a basic biological phenomenon with wide-  
1298 ranging implication in tissue kinetics. *British Journal of Cancer* **26**(4):239–57 (1972).
- 1299 51.T. Khan, *et al.*, Quantifying Nucleation In Vivo Reveals the Physical Basis of Prion-like  
1300 Phase Behavior. *Molecular Cell* **71**(1):155-168 (2018).
- 1301 52.M. Klutstein, A. Fennell, A. Fernández-Álvarez, J.P. Cooper, The telomere bouquet  
1302 regulates meiotic centromere assembly. *Nat Cell Biol.* **17**(4):458-69(2015).



- 1303 53.T.A. Kohda, K. Tanaka, M. Konomi, M. Sato, M. Osumi, M. Yamamoto, Fission yeast  
1304 autophagy induced by nitrogen starvation generates a nitrogen source that drives  
1305 adaptation processes. *Genes to Cells* **12**(2):155-170 (2007).
- 1306 54.J. Kremer, D. Mastronarde, and J. McIntosh, Computer visualization of three-dimensional  
1307 image data using IMOD. *Journal of Structural Biology* **116**(1):71-76 (1996).
- 1308 55.A. Krogh, B. Larsson, G. von Heijne, E.L. Sonnhammer, Predicting transmembrane protein  
1309 topology with a hidden Markov model: application to complete genomes. *Journal of*  
1310 *Molecular Biology* **305**:567–580 (2001).
- 1311 56.A.N. Kruger, M.A. Brogley, J.L. Huizinga, J.M. Kidd, D.G. de Rooij, Y-C. Hu, J.L. Mueller, A  
1312 Neofunctionalized X-linked Ampliconic Gene Family Is Essential for Male Fertility and Equal  
1313 Sex Ratio in Mice. *Current Biology* **29**(21):3699-3706 (2019).
- 1314 57.D. Kryndushkin, G. Ihrke, T.C. Piermartiri, F. Shewmaker, A yeast model of optineurin  
1315 proteinopathy reveals a unique aggregation pattern associated with cellular toxicity.  
1316 *Molecular Microbiology* **86**(6):1531-47 (2012).
- 1317 58.Z. Kuang, J.D. Boeke, S. Canzar, The dynamic landscape of fission yeast meiosis  
1318 alternative-splice isoforms. *Genome Res.* **27**(1):145–156 (2016).
- 1319 59.R. Kumar, P.P. Nawroth, J. Tyedmers, Hitchhiking vesicular transport routes to the vacuole:  
1320 Amyloid recruitment to the Insoluble Protein Deposit (IPOD). *Prion* **11**(2):71-81 (2017).
- 1321 60.R. Kumar, P.P. Nawroth, J. Tyedmers, Prion Aggregates Are Recruited to the Insoluble  
1322 Protein Deposit (IPOD) via Myosin 2-Based Vesicular Transport. *PLOS Genetics* **12**(9):  
1323 e1006324 (2016)
- 1324 61.A.M. Larracuenta and D.C. Presgraves, The selfish Segregation Distorter gene complex of  
1325 *Drosophila melanogaster*. *Genetics* **192**(1):33-53 (2012).
- 1326 62.X. Li, T. Ohmori, K. Irie, Y. Kimura, Y. Suda, T. Mizuno, K. Irie, Different regulations of  
1327 ROM2 and LRG1 expression by Ccr4, Pop2, and Dhh1 in the *Saccharomyces cerevisiae*  
1328 cell wall integrity pathway. *mSphere* **1**(5):e00250-16 (2016).
- 1329 63.C.J. Lin, F. Hu, R. Dubruille, J. Vedanayagam, J. Wen, P. Smibert, B. Loppin, E.C. Lai, The  
1330 hpRNA/RNAi Pathway Is Essential to Resolve Intragenomic Conflict in the *Drosophila* Male  
1331 Germline. *Developmental Cell* **46**(3):316-326 (2018).
- 1332 64.A.K. Lindholm, K.A. Dyer, R.C. Firman, L. Fishman, W. Forstmeier, L. Holman, H.  
1333 Johannesson, U. Knief, H. Kokko, A.M. Larracuenta, A. Manser, C. Montchamp-Moreau,  
1334 V.G. Petrosyan, A. Pomiankowski, D.C. Presgraves, L.D. Safronova, A. Sutter, R.L.  
1335 Unckless, R.L. Verspoor, N. Wedell, et al., The Ecology and Evolutionary Dynamics of  
1336 Meiotic Drive. *Trends in Ecology and Evolution* **31**(4):315-326 (2016).

- 1337 65.G. Liu, A.N. Coyne, F. Pei, S. Vaughan, M. Chaung, D.C. Zarnescu, J.R. Buchan,  
1338 Endocytosis regulates TDP-43 toxicity and turnover. *Nature communications* **8**(1):2092  
1339 (2017).
- 1340 66.B. Liu, L. Larsson, A. Caballero, X. Hao, D. Oling, J. Grantham, T. Nystrom, The  
1341 polarisome is required for segregation and retrograde transport of protein  
1342 aggregates. *Cell* **140**(2):257–267 (2010).
- 1343 67.Y. Long, L. Zhao, B. Niu, J. Su, H. Wu, *et al.*, Hybrid male sterility in rice controlled by  
1344 interaction between divergent alleles of two adjacent genes. *Proceedings of the National*  
1345 *Academy of Sciences of the United States of America* **105**(48):18871-6 (2008).
- 1346 68.J.F. López Hernández, S. E. Zanders, Veni, vidi, vici: the success of *wtf* meiotic drivers in  
1347 fission yeast. *Yeast* **35**(7):447-453 (2018).
- 1348 69.A. Lupas, M. Van Dyke, and J. Stock, Predicting Coiled Coils from Protein Sequences.  
1349 *Science* **252**:1162-1164 (1991).
- 1350 70.R.S. Marshall, F. McLoughlin, R.D. Vierstra, Autophagic Turnover of Inactive 26S  
1351 Proteasomes in Yeast Is Directed by the Ubiquitin Receptor Cue5 and the Hsp42  
1352 Chaperone. *Cell* **16**(6): 1717-1732 (2016).
- 1353 71.A. Matsuyama, R. Arai, Y. Yashiroda, *et al.*, ORFeome cloning and global analysis of  
1354 protein localization in the fission yeast *Schizosaccharomyces pombe*. *Nature*  
1355 *Biotechnology* **24**: 841–847 (2006).
- 1356 72.A.M. Neiman, Sporulation in the Budding Yeast *Saccharomyces cerevisiae*. *Genetics*  
1357 **189**(3): 737-765 (2011).
- 1358 73.N.L. Nuckolls, M.A. Bravo Núñez, M.T. Eickbush, J.M. Young, J.J. Lange, J.S. Yu, G.R.  
1359 Smith, S.L. Jaspersen, H.S. Malik, S.E. Zanders, *wtf* genes are prolific dual poison–  
1360 antidote meiotic drivers. *eLife* **6**:e26033 (2017).
- 1361 74.M.J. Ohira, D.G. Hendrickson, R.S. Mclsaac, N. Rhind, An estradiol-inducible promoter  
1362 enables fast, graduated control of gene expression in fission yeast. *Yeast* **34**(8):323-334  
1363 (2017).
- 1364 75.D.S. Ottoz, F. Rudolf, J. Stelling, Inducible, tightly regulated and growth condition-  
1365 independent transcription factor in *Saccharomyces cerevisiae*. *Nucleic Acids Research*  
1366 **42**(17):e130 (2014).
- 1367 76.F. Pardo-Manuel de Villena, C. Sapienza, Female meiosis drives karyotypic evolution in  
1368 mammals. *Genetics* **159**(3):1179–1189 (2001).

- 1369 77.K.E. Pieper, R.L. Unckless, K.A. Dyer, A fast-evolving X-linked duplicate of importin- $\alpha$ 2  
1370 overexpressed in sex-ratio drive in *Drosophila neotestacea*. *Molecular Ecology*  
1371 **27**(24):5165-79 (2018).
- 1372 78.N. Rhind, Z. Chen, M. Yassour, *et al.*, Comparative functional genomics of the fission  
1373 yeasts. *Science* **332**(6032):930-6 (2011).
- 1374 79.N.A. Rhoades, A.M. Harvey, D.A. Samarajeewa, J. Svedberg, A. Yusifov, A. Abusharekh,  
1375 *et al.*, Identification of *rfl-1*, a meiotic driver undergoing RNA editing in *Neurospora*.  
1376 *Genetics* **212**(1):93-110 (2019).
- 1377 80.R. Riek. S.J. Saupe, The HET-S/s prion motif in the control of programmed cell death. *Cold*  
1378 *Spring Harb. Perspect. Biol.* **8**(9):a023515 (2016).
- 1379 81.A.D. Roeder, J.M. Shaw, Vacuole partitioning during meiotic division in yeast. *Genetics*  
1380 **144**(2):445-58 (1996).
- 1381 82.O. Ronneberger, P. Fischer, T. Brox, U-Net: Convolutional Networks for Biomedical Image  
1382 Segmentation. In: N. Navab, J. Hornegger, W. Wells, A. Frangi (eds) Medical Image  
1383 Computing and Computer-Assisted Intervention. *Lecture Notes in Computer Science* 9351,  
1384 Springer, Cham (2015).
- 1385 83.S. Rothe, A. Prakash, J. Tyedmers, The Insoluble Protein Deposit (IPOD) in  
1386 Yeast. *Frontiers in Molecular Neuroscience* **11**:237 (2018).
- 1387 84.L. Ruan, C. Zhou, E. Jin, A. Kucharavy, Y. Zhang, Z. Wen, L. Florens, R. Li, Cytosolic  
1388 proteostasis through importing of misfolded proteins into mitochondria. *Nature*  
1389 **543**(7645):443-446 (2017).
- 1390 85.L. Sandler, E. Novitski, Meiotic Drive as an Evolutionary Force. *The American Naturalist*  
1391 **91**:105-110 (1957).
- 1392 86.J. Schimenti, Segregation distortion of mouse *t* haplotypes the molecular basis  
1393 emerges. *Trends in Genetics* **16**(6):240–243 (2000).
- 1394 87.R.B. Sekar, A. Periasamy, Fluorescence resonance energy transfer (FRET) microscopy  
1395 imaging of live cell protein localizations. *Journal of Cell Biology* **160**(5):629–633 (2003).
- 1396 88.R. Shen, L. Wang, X. Liu, *et al.*, Genomic structural variation-mediated allelic suppression  
1397 causes hybrid male sterility in rice. *Nature Communications* **8**:1310 (2017).
- 1398 89.R.S. Sikorski, P. Hieter, A system of shuttle vectors and yeast host strains designed for  
1399 efficient manipulation of DNA in *Saccharomyces cerevisiae*. *Genetics* **122**(1):19-27 (1989).
- 1400 90.G. Singh, A.J. Klar, The 2.1-kb inverted repeat DNA sequences flank the *mat2,3* silent  
1401 region in two species of *Schizosaccharomyces* and are involved in epigenetic silencing in  
1402 *Schizosaccharomyces pombe*. *Genetics* **162**:591–602 (2002).

- 1403 91.B.D. Slaughter, J.R. Unruh, A. Das, S.E. Smith, B. Rubinstein, R. Li, Non-uniform  
1404 membrane diffusion enables steady-state cell polarization via vesicular trafficking. *Nature*  
1405 *Communications* **4**:1380 (2013).
- 1406 92.G.R. Smith, Genetic analysis of meiotic recombination in *Schizosaccharomyces*  
1407 *pombe*. *Methods Mol Biol.* **557**:65–76 (2009).
- 1408 93.J.H. Soper, S. Roy, A. Stieber, E. Lee, R.B. Wilson, J.Q. Trojanowski, C.G. Burd, V.M. Lee,  
1409  $\alpha$ -Synuclein-induced Aggregation of Cytoplasmic Vesicles in *Saccharomyces cerevisiae*.  
1410 *Molecular Biology of the Cell* **19**(3):1093–1103 (2008).
- 1411 94.M.S. Stewart, S.A. Krause, J. McGhie, J.V. Gray, Mpt5p, a stress tolerance- and lifespan-  
1412 promoting PUF protein in *Saccharomyces cerevisiae*, acts upstream of the cell wall integrity  
1413 pathway. *Eukaryotic Cell* **6**(2):262-70. (2007).
- 1414 95.Y. Suda, H. Nakanishi, E. Mathieson, A. Neiman, Alternative Modes of Organellar  
1415 Segregation during Sporulation in *Saccharomyces cerevisiae*. *Eukaryotic Cell*  
1416 **6**(11):2009-2017 (2007).
- 1417 96.L.L. Sun, M. Li, F. Suo, *et al.*, Global Analysis of Fission Yeast Mating Genes Reveals New  
1418 Autophagy Factors. *PLOS Genetics* **9**(8):e1003715 (2013).
- 1419 97.K. Suzuki, Y. Ohsumi, Current knowledge of the pre-autophagosomal structure  
1420 (PAS). *FEBS Letters* **584**(7):1280–1286 (2010).
- 1421 98.J.P. Taylor, F. Tanaka, J. Robitschek, C.M. Sandoval, A. Taye, S. Markovic-Plese, K.H.  
1422 Fischbeck, Aggresomes protect cells by enhancing the degradation of toxic polyglutamine-  
1423 containing protein. *Human Molecular Genetics* **12**(7):749–757 (2003).
- 1424 99.K. Tomita, J.P. Cooper, The telomere bouquet controls the meiotic spindle.  
1425 *Cell* **130**(1):113-26 (2007).
- 1426 100.J. Tyedmers, S. Treusch, J. Dong, J.M. McCaffery, B. Bevis, S. Lindquist, Prion induction  
1427 involves an ancient system for the sequestration of aggregated proteins and heritable  
1428 changes in prion fragmentation. *Proceedings of the National Academy of Sciences of the*  
1429 *United States of America* **107**(19):8633–8638 (2010).
- 1430 101.A.A. Vogan, S.L. Ament-Velásquez, A. Granger-Farbos, J. Svedberg, E. Bastiaans, A.J.  
1431 Debets, V. Coustou, H. Yvanne, C. Clavé, S.J. Saupe, H. Johannesson, Combinations  
1432 of Spok genes create multiple meiotic drivers in *Podospora*. *eLife* **8**:e46454 (2019).
- 1433 102.S. Willingham, T.F. Outeiro, M.J. DeVit, S.L. Lindquist, P.J. Muchowski, Yeast genes that  
1434 enhance the toxicity of a mutant huntingtin fragment or alpha-synuclein. *Science*  
1435 **302**(5651):1769-72 (2003).

- 1436 103.Y. Xie, J. Tang, X. Xie, X. Li, J. Huang, *et al.*, An asymmetric allelic interaction drives allele  
1437 transmission bias in interspecific rice hybrids. *Nature Communications* **10**(1):2501 (2019).
- 1438 104.X. Yu, Z. Zhao, X. Zheng, J. Zhou, *et al.*, A selfish genetic element confers non-Mendelian  
1439 inheritance in rice. *Science* **360**:1130-1132 (2018).
- 1440 105.S.E. Zanders, M.T. Eickbush, J.S. Yu, J. Kang, K. Fowler, G.R. Smith, H.S. Malik, Genome  
1441 rearrangements and pervasive meiotic drive cause hybrid infertility in fission yeast.  
1442 *eLife* **3**:e02630 (2014).
- 1443 106.D. Zhang, A. Vjestica, S. Oliferenko, Plasma membrane tethering of the cortical ER  
1444 necessitates its finely reticulated architecture. *Current Biology* **22**(21): 2048-52 (2012).
- 1445 107.H. Zhang, S. Elbaum-Garfinkle, E. Langdon, N. Taylor, P. Occhipinti, A. Bridges, C. P.  
1446 Brangwynne, and A.S. Gladfelter, RNA controls PolyQ protein phase transitions. *Molecular*  
1447 *Cell* **60**(2):220–230 (2015).
- 1448 108.D. Zhao, *et al.*, Atg20- and Atg24-family proteins promote organelle autophagy in fission  
1449 yeast. *Journal of Cell Science* **129**:4289-4304 (2016).
- 1450 109.C. Zhou, B.D. Slaughter, J.R. Unruh, F. Guo, Yu Z, K. Mickey, A. Narkar, R.T. Ross, M.  
1451 McClain, R. Li R, Organelle-based aggregation and retention of damaged proteins in  
1452 asymmetrically dividing cells. *Cell* **159**(3):530-42 (2014).
- 1453
- 1454

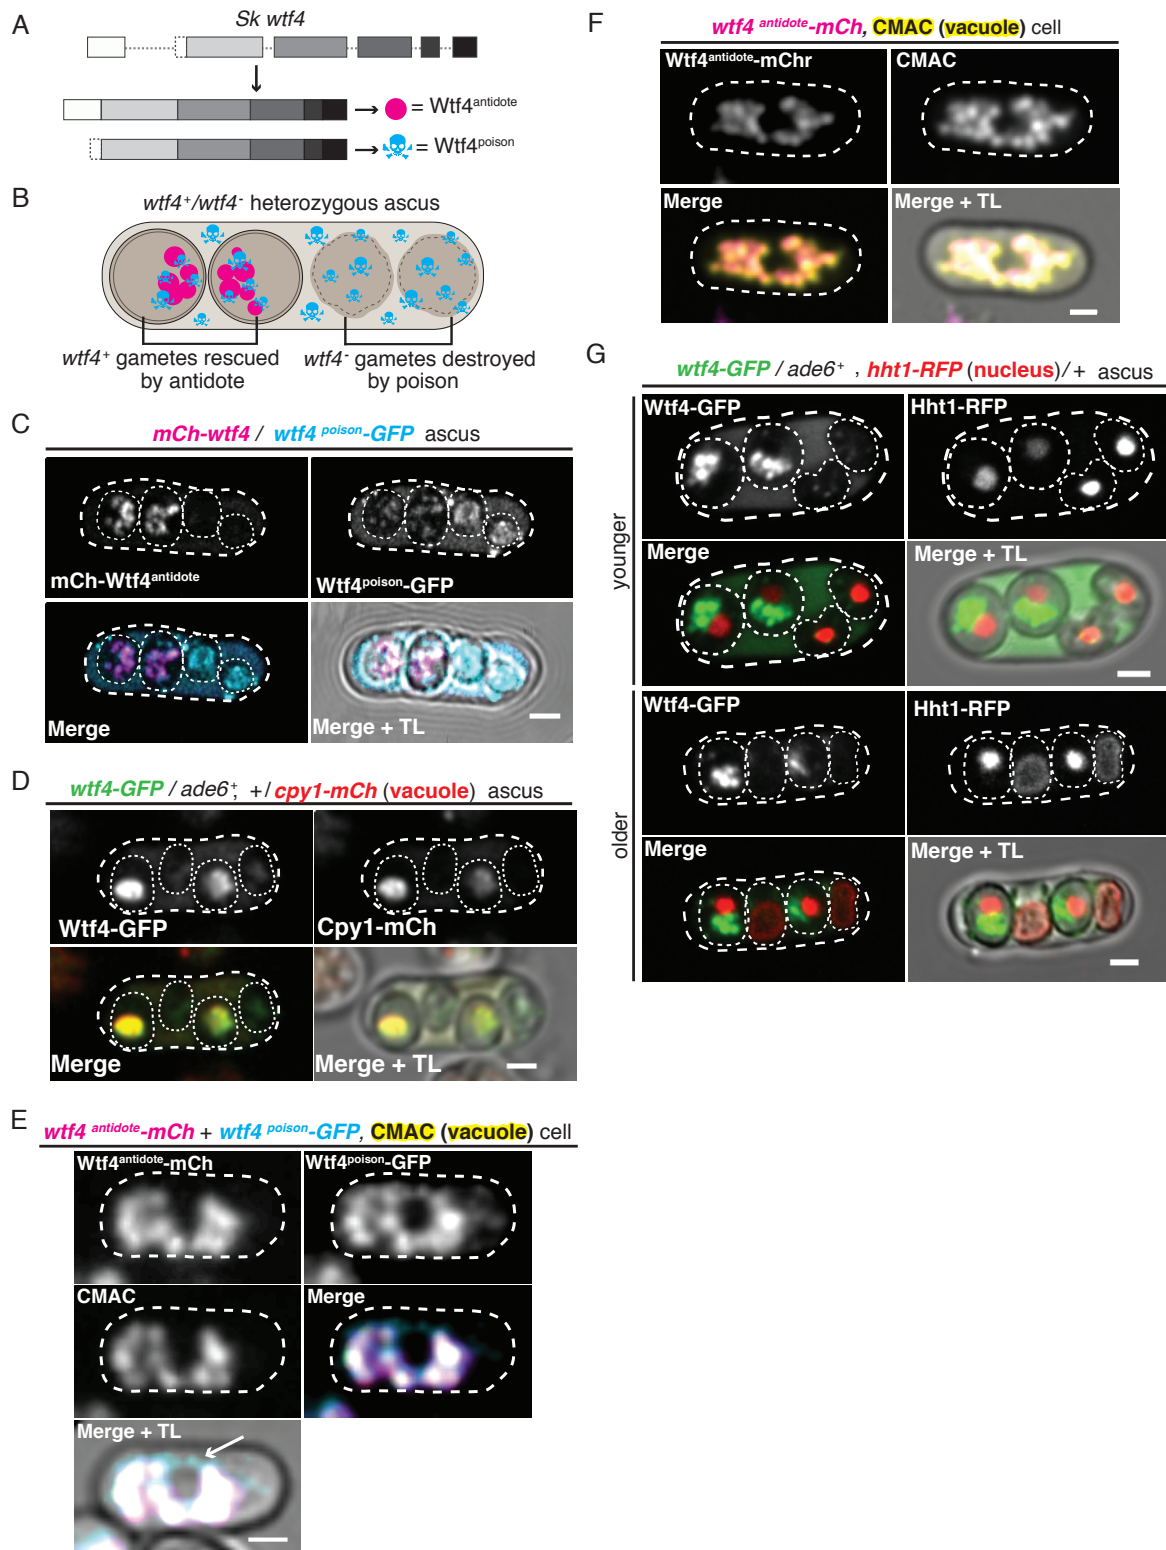



1488 **Figure 1. Wtf4<sup>poison</sup> and Wtf4<sup>antidote</sup> protein localization in both *S. pombe* meiosis and**  
1489 **vegetative growth.** (A) The *wtf4* gene utilizes alternate transcriptional start sites to encode  
1490 Wtf4<sup>antidote</sup> and Wtf4<sup>poison</sup>. (B) Model of a tetrad generated from a *wtf4<sup>+</sup>/wtf4<sup>-</sup>* diploid. *wtf4<sup>+</sup>* spores  
1491 are rescued by the spore-enriched antidote (magenta circles), while the poison (cyan skulls)  
1492 spreads throughout the ascus. (C) An ascus generated by an *mCherry-wtf4/wtf4<sup>poison</sup>-GFP*  
1493 diploid showing the localization of mCherry-Wtf4<sup>antidote</sup> (magenta in merged images) and  
1494 Wtf4<sup>poison</sup>-GFP (cyan in merged images) (Nuckolls et al., 2017). (D) An ascus generated from a  
1495 *wtf4-GFP/ade6<sup>+</sup>, +/ cpy1-mCherry* diploid showing localization of Wtf4-GFP (green in merged  
1496 images) and Cpy1-mCherry (red in merged images). (E) A vegetatively growing haploid cell  
1497 expressing Wtf4<sup>poison</sup>-GFP (cyan in merged images) and Wtf4<sup>antidote</sup>-mCherry (magenta in  
1498 merged images) using the  $\beta$ -estradiol inducible system. CMAC is a vacuole lumen stain (yellow  
1499 in merged images). Both Wtf4 proteins colocalize with the vacuole, except for a circle of  
1500 Wtf4<sup>poison</sup>-GFP that lacks Wtf4<sup>antidote</sup>-mCherry (arrow). Cells were imaged 4 hours after induction  
1501 with 100 nM  $\beta$ -estradiol. (F) A vegetatively growing haploid cell expressing Wtf4<sup>antidote</sup>-mCherry  
1502 (magenta in the merged images) using the  $\beta$ -estradiol system and stained with the CMAC  
1503 vacuole stain (yellow in the merged images). Cells were induced in the same way as in E. (G)  
1504 Asci generated from a *wtf4-GFP/ade6<sup>+</sup>, hht1-RFP/+* diploid. Hht1-RFP (red in merged images)  
1505 is a histone marker. All scale bars represent 2  $\mu$ m.

1506

1507

1508

1509

1510

1511

1512

1513

1514

1515

1516

1517

1518

1519

1520



1554 **Figure 1-figure supplement 1. Wtf4<sup>poison</sup> and Wtf4<sup>antidote</sup> protein sequences and localization**

1555 **in *S. pombe* asci.** (A) Wtf4 protein sequence. Wtf4<sup>antidote</sup> is encoded by all 6 exons. Wtf4<sup>poison</sup> is  
1556 encoded by exons 2-6 and gains three amino acids (MLS) from intron 1. Exon 1 contains a  
1557 predicted coiled-coil domain (depicted with an orange coil, *Lupas, Dyke, and Stock, 1991*).  
1558 There are six predicted transmembrane domains (depicted by blue lines) (TMHMM model,  
1559 *Krogh et al., 2001*) found throughout the amino acid sequences shared by both proteins. There  
1560 are also two regions of repetitive sequences: one found in exon 3 and one found in exon 6  
1561 (*Eickbush et al., 2019*). These are depicted with gray boxes. (B) Time-lapse microscopy of an  
1562 ascus generated by a *mCherry-wtf4/wtf4<sup>poison</sup>-GFP* diploid. mCherry-Wtf4<sup>antidote</sup> is shown in  
1563 magenta and Wtf4<sup>poison</sup>-GFP as cyan in merged images. All scale bars represent 2  $\mu$ m. (C)  
1564 Pearson correlation of mCherry-Wtf4<sup>antidote</sup> and Wtf4<sup>poison</sup>-GFP from spores within asci generated  
1565 from *mCherry-wtf4/wtf4<sup>poison</sup>-GFP* diploids is shown. Error bars represent standard error.

1566

1567

1568

1569

1570

1571

1572

1573

1574

1575

1576

1577

1578

1579

1580

1581

1582

1583

1584

1585

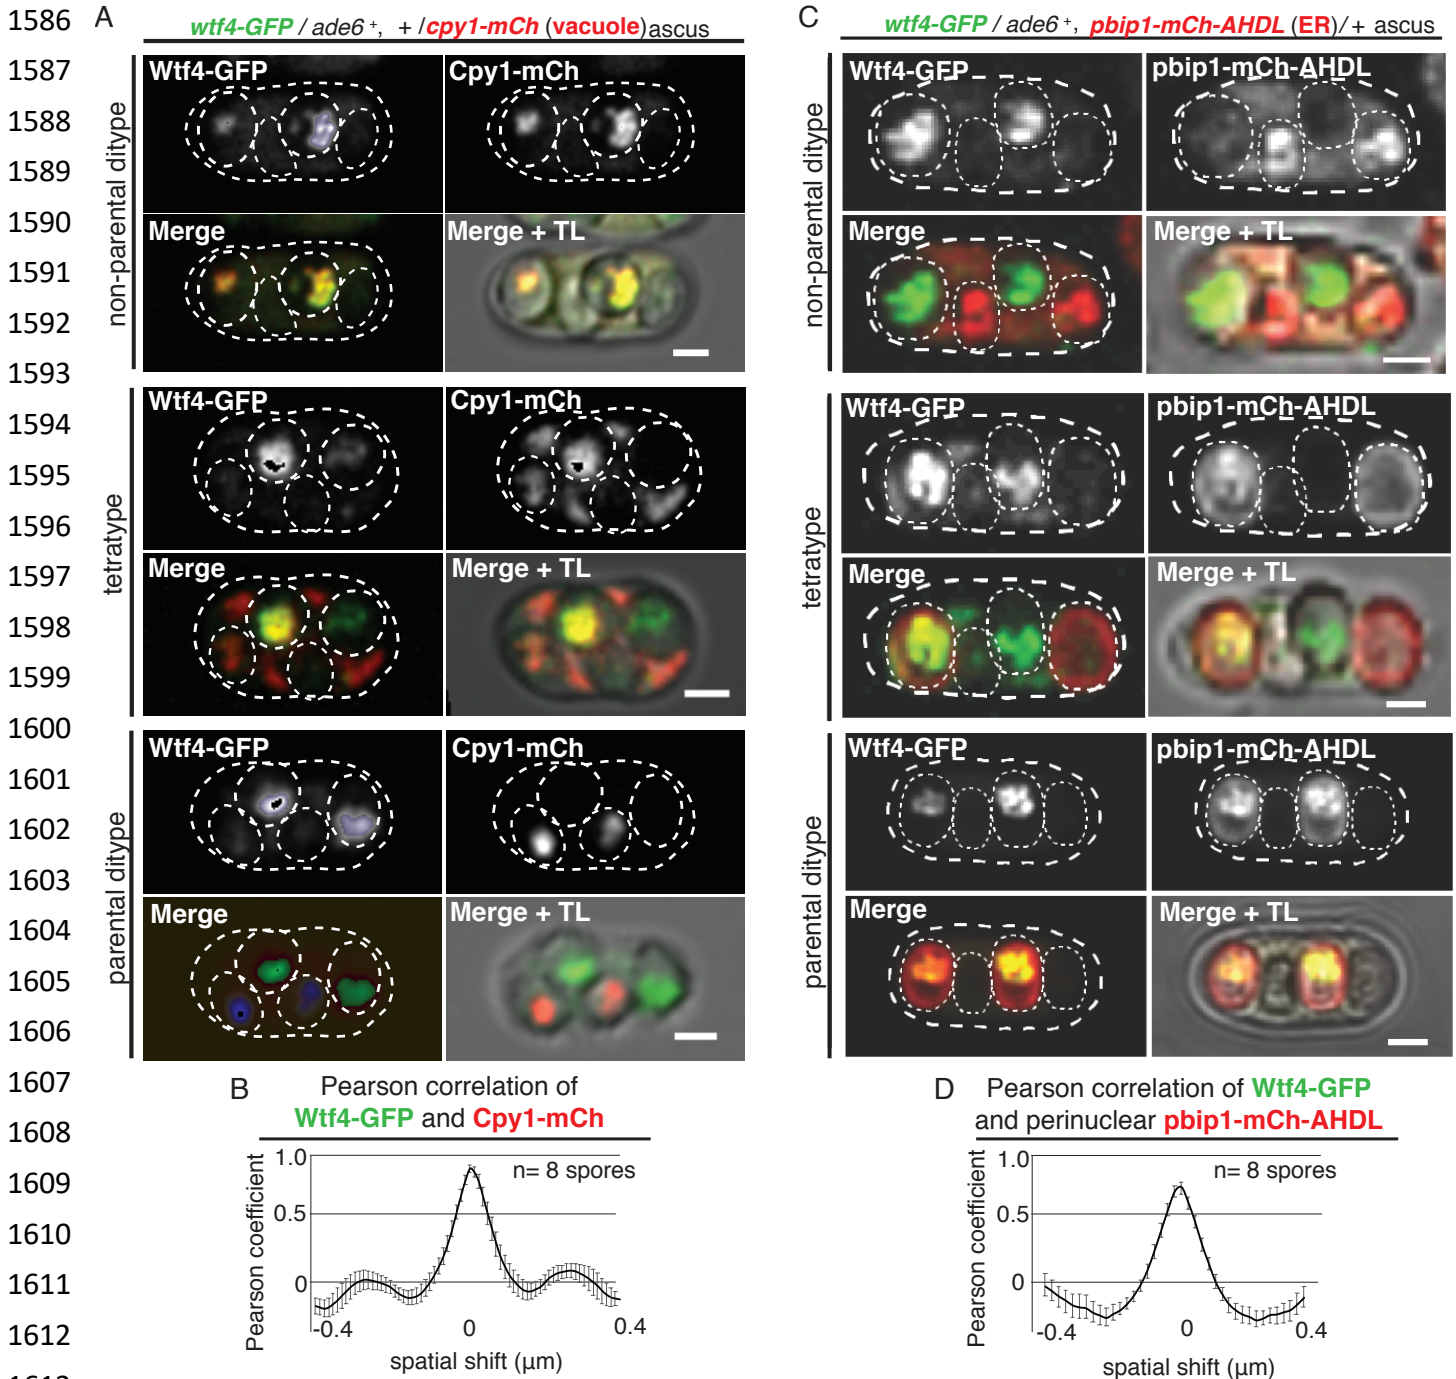

1614 **Figure 1-figure supplement 2. *Wtf4<sup>poison</sup>* and *Wtf4<sup>antidote</sup>* colocalize in the vacuole and**  
 1615 **endoplasmic reticulum (ER) in spores. (A)** Non-parental ditype, tetratype, and parental ditype  
 1616 asci generated by *wtf4-GFP/ade6<sup>+</sup>, +/cpy1-mCherry* diploids. Cpy1-mCherry (red in merged  
 1617 images) is a vacuole luminal marker and Wtf4-GFP is shown in green in merged images. (B)  
 1618 Pearson correlation of Wtf4-GFP and Cpy1-mCherry in spores that inherited both alleles  
 1619 generated by *wtf4-GFP/ade6<sup>+</sup>, +/cpy1-mCherry* diploids shows a coefficient of approximately

1620 0.89. (C) Non-parental ditype, tetratype, and parental ditype asci generated by *wtf4-GFP/ade6<sup>+</sup>*,  
1621 *pbip1-mCherry-AHDL/+* diploids. *pbip1-mCherry-AHDL* (red in merged images) is an ER marker  
1622 and *Wtf4-GFP* is shown in green in merged images. All scale bars represent 2  $\mu$ m. (D) Pearson  
1623 correlation of *Wtf4-GFP* and *pbip1-mCherry-AHDL* from spores that inherited both alleles  
1624 generated by *wtf4-GFP/ade6<sup>+</sup>*, *pbip1-mCherry-AHDL/+* diploids shows a coefficient of  
1625 approximately 0.74. Error bars represent standard error.

1626

1627

1628

1629

1630

1631

1632

1633

1634

1635

1636

1637

1638

1639

1640

1641

1642

1643

1644

1645

1646

1647

1648

1649

1650

1651

1652

1653



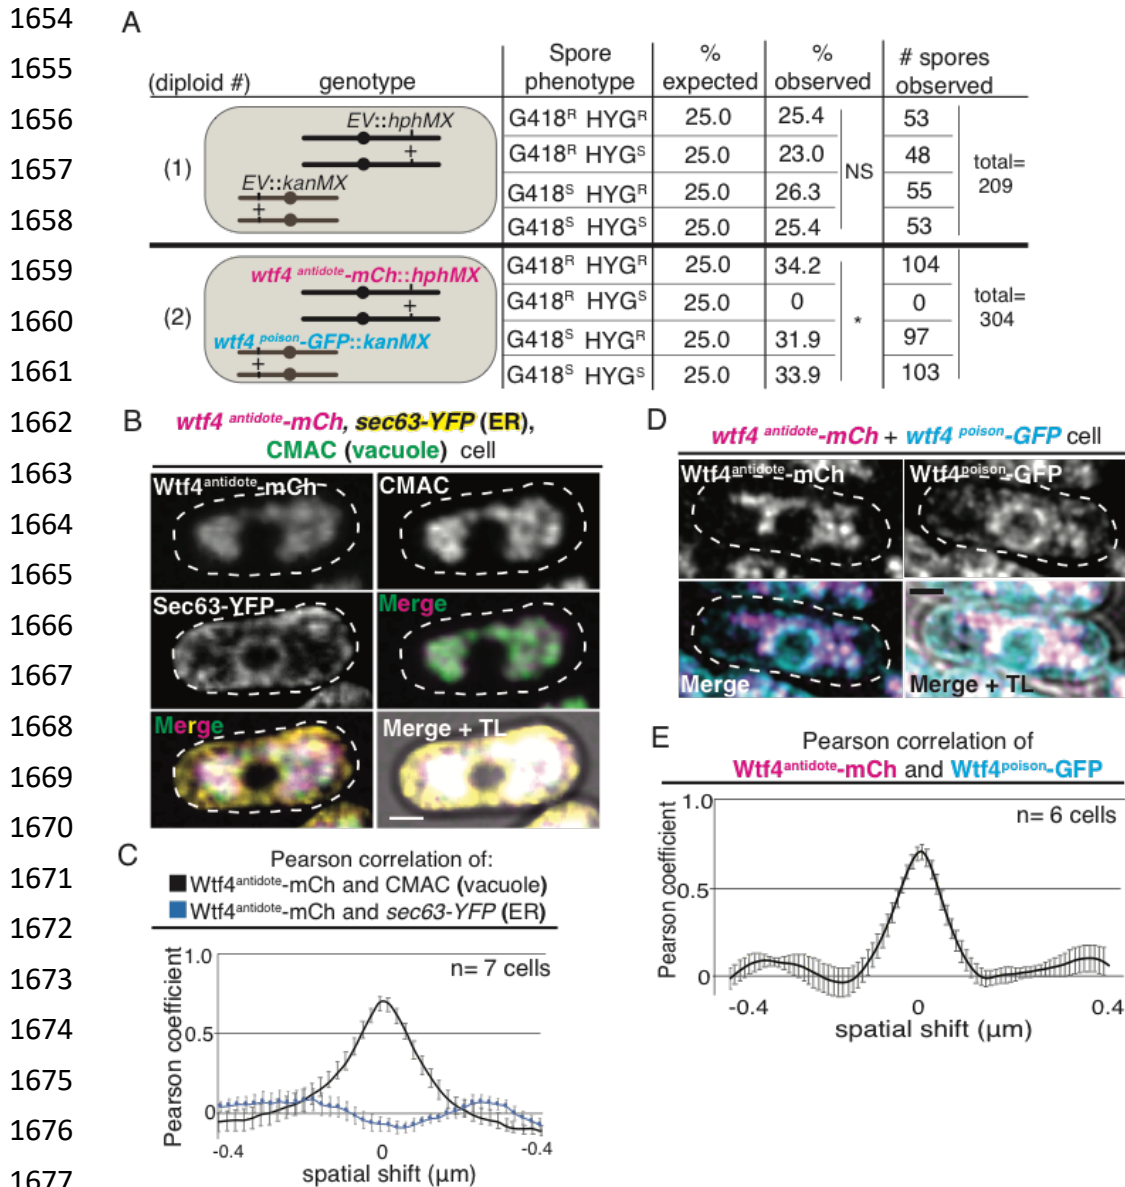



1688 genotype and the observed percentages are shown, as well as the raw numbers (\* =  $p < 0.01$ ,  
1689 g-test; NS= not significant). (B) A vegetatively growing haploid cell expressing a  $\beta$ -estradiol  
1690 inducible *wtf4<sup>antidote</sup>-mCherry* allele (magenta in merged images). It also contains a tagged  
1691 *sec63-YFP* allele to mark the endoplasmic reticulum (ER) (yellow in merged images) and is  
1692 stained with CMAC, a vacuole stain (green in merged images). Cells were imaged four hours  
1693 after induction with 100 nM  $\beta$ -estradiol. (C) Pearson Correlation of *Wtf4<sup>antidote</sup>-mCherry* and  
1694 CMAC (vacuole, black line) and *sec63-YFP* (ER, blue line) from cells carrying a  $\beta$ -estradiol  
1695 inducible *wtf4<sup>antidote</sup>-mCherry* allele, integrated *sec63-YFP* allele, and stained with CMAC,  
1696 imaged four hours after induction with 100 nM  $\beta$ -estradiol. *Wtf4<sup>antidote</sup>-mCherry* and CMAC  
1697 shows a Pearson coefficient of approximately 0.69, while *Wtf4<sup>antidote</sup>-mCherry* and *Sec63-YFP*  
1698 shows -0.06. (D) A vegetatively growing haploid cell expressing a  $\beta$ -estradiol inducible  
1699 *wtf4<sup>antidote</sup>-mCherry* allele (magenta in merged images) and a  $\beta$ -estradiol inducible *wtf4<sup>poison</sup>-GFP*  
1700 *allele* (cyan in merged images) imaged four hours after induction with 100 nM  $\beta$ -estradiol. (E)  
1701 Pearson correlation of *Wtf4<sup>antidote</sup>-mCherry* and *Wtf4<sup>poison</sup>-GFP* from cells carrying a  $\beta$ -estradiol  
1702 inducible *wtf4<sup>antidote</sup>-mCherry* allele and a  $\beta$ -estradiol inducible *wtf4<sup>poison</sup>-GFP* allele 4 hours after  
1703 induction with 100 nM  $\beta$ -estradiol shows a Pearson coefficient of approximately 0.64. All scale  
1704 bars represent 2  $\mu$ m.

1705

1706

1707

1708

1709

1710

1711

1712

1713

1714

1715

1716

1717

1718

1719

1720

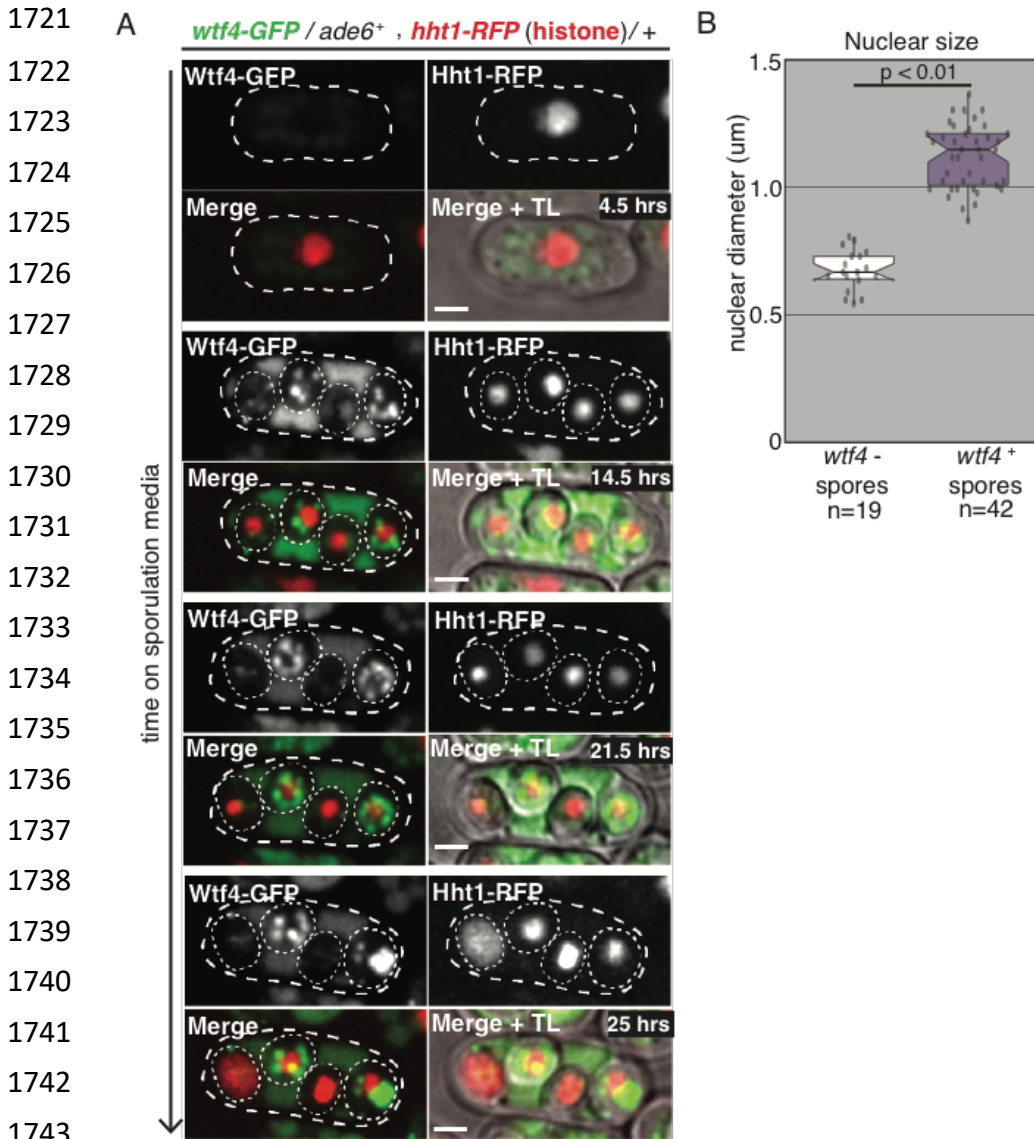

1744 **Figure 1-figure supplement 4. Spores destroyed by *Wtf4*<sup>poison</sup> exhibit nuclear**  
 1745 **condensation followed by fragmentation.** (A) A time course showing the nuclear phenotypes  
 1746 representative of gametogenesis starting from a *wtf4-GFP/ade6<sup>+</sup>, hht1-RFP/+* diploid. The  
 1747 nucleus was visualized using the histone Hht1-RFP marker (red in merged images). The spores  
 1748 that inherit the *wtf4-GFP* allele can be distinguished from those that do not, because the *wtf4<sup>+</sup>*  
 1749 spores have enriched GFP signal (green in merged images) from the accumulation of the  
 1750 *Wtf4*<sup>antidote</sup>. During spore development, the nuclei of the *wtf4<sup>-</sup>* spores appear to condense (14.5  
 1751 hours) and, in some spores, fragment (25 hours). All scale bars represent 2 μm. (B)  
 1752 Quantification of nuclear diameter (μm) in *wtf4<sup>-</sup>* and *wtf4<sup>+</sup>* spores in asci produced by *wtf4-*  
 1753 *GFP/ade6<sup>+</sup>, hht1-RFP/+* diploids, imaged two days after placement on SPA media. We excluded  
 1754 any nuclei that appeared to have already exploded ( $p < 0.01$ , t-test).

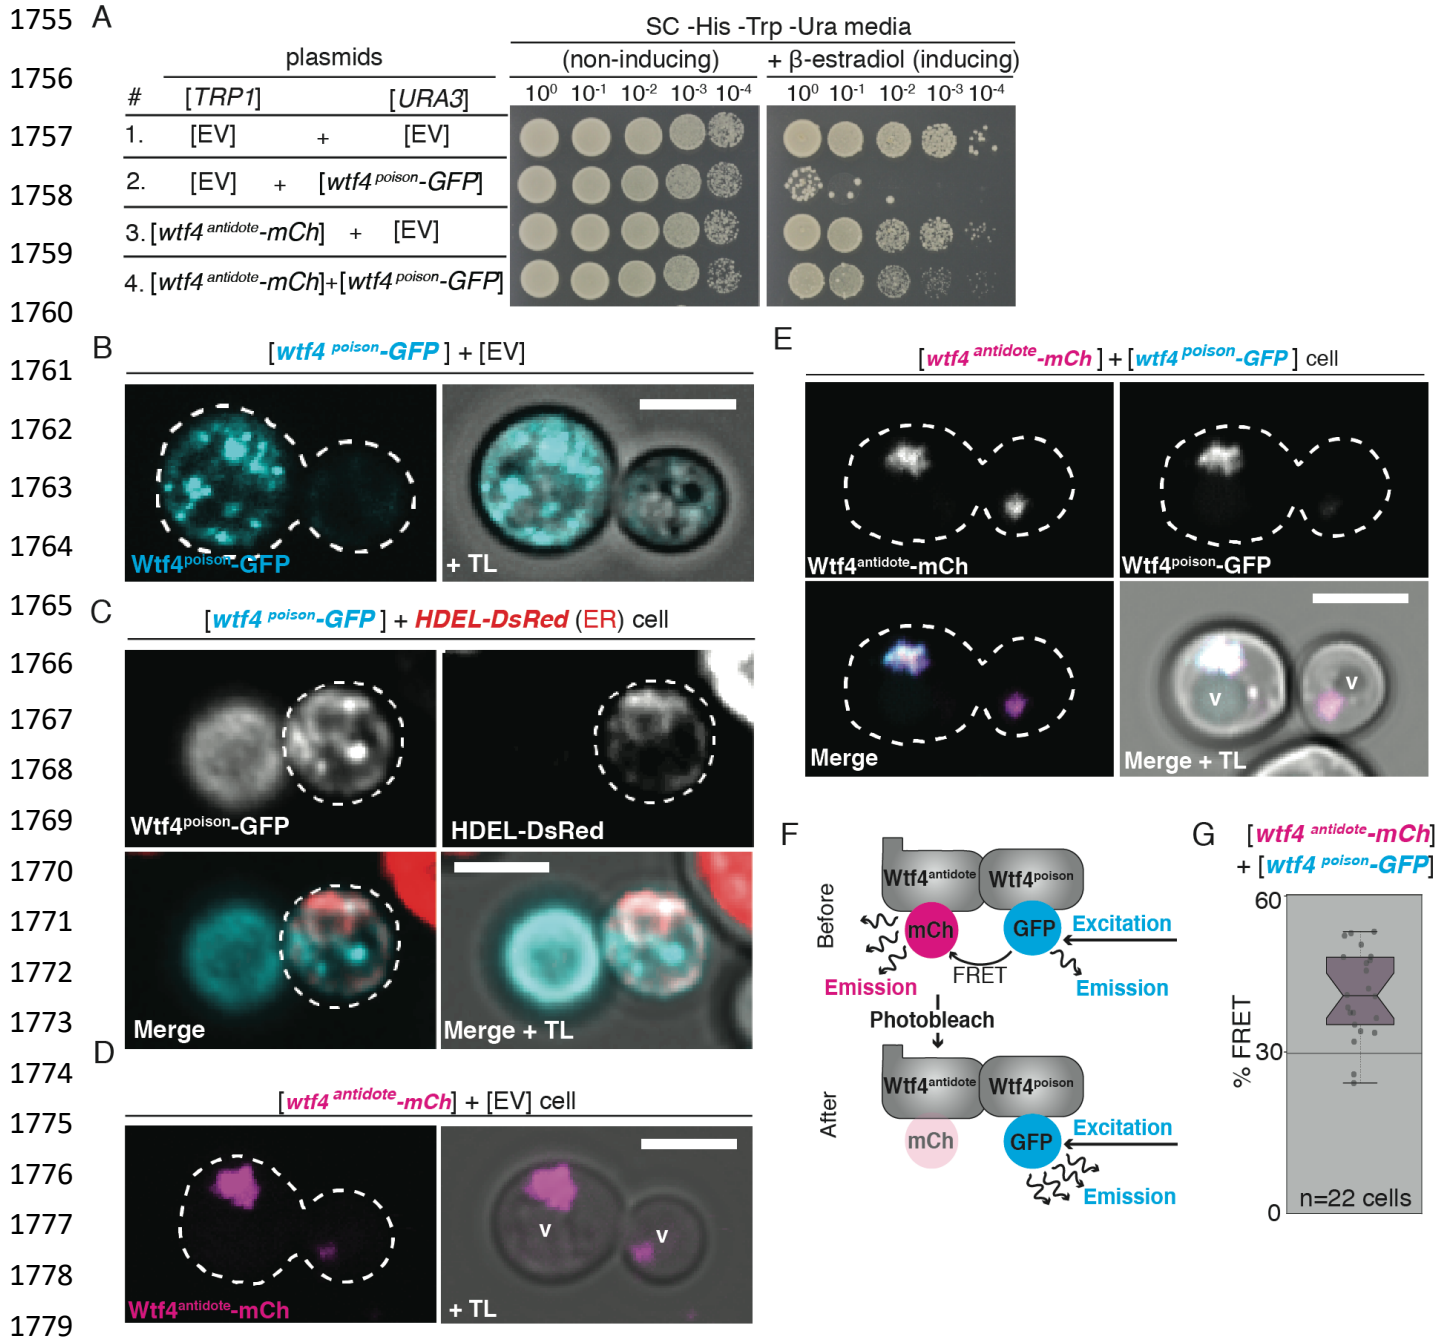

1787 *wtf4<sup>poison</sup>-GFP* allele (cyan in merged images). (D) A haploid cell carrying an empty [*URA3*]  
1788 vector and a [*TRP1*] vector with a  $\beta$ -estradiol inducible *wtf4<sup>antidote</sup>-mCherry* allele (magenta). (E)  
1789 A haploid cell carrying a [*URA3*] vector with a  $\beta$ -estradiol inducible *wtf4<sup>poison</sup>-GFP* allele (cyan in  
1790 merged images) and a [*TRP1*] vector with a  $\beta$ -estradiol inducible *wtf4<sup>antidote</sup>-mCherry* allele  
1791 (magenta in merged images). The vacuole is marked with 'v'. (F) Cartoon of acceptor  
1792 photobleaching Fluorescence Resonance Energy Transfer (FRET). If the two proteins interact,  
1793 *Wtf4<sup>poison</sup>-GFP* (the donor) transfers energy to *Wtf4<sup>antidote</sup>-mCherry* (the acceptor). After  
1794 photobleaching of the acceptor, the donor emission will increase. (G) Quantification of FRET  
1795 values measured in cells carrying  $\beta$ -estradiol inducible *Wtf4<sup>antidote</sup>-mCherry* and  $\beta$ -estradiol  
1796 inducible *Wtf4<sup>poison</sup>-GFP*. The cells showed an average of 40% FRET. In all experiments, the  
1797 cells were imaged approximately four hours after induction in 500 nM  $\beta$ -estradiol. All scale bars  
1798 represent 4  $\mu$ m.

1799

1800

1801

1802

1803

1804

1805

1806

1807

1808

1809

1810

1811

1812

1813

1814

1815

1816

1817

1818

1819

1820

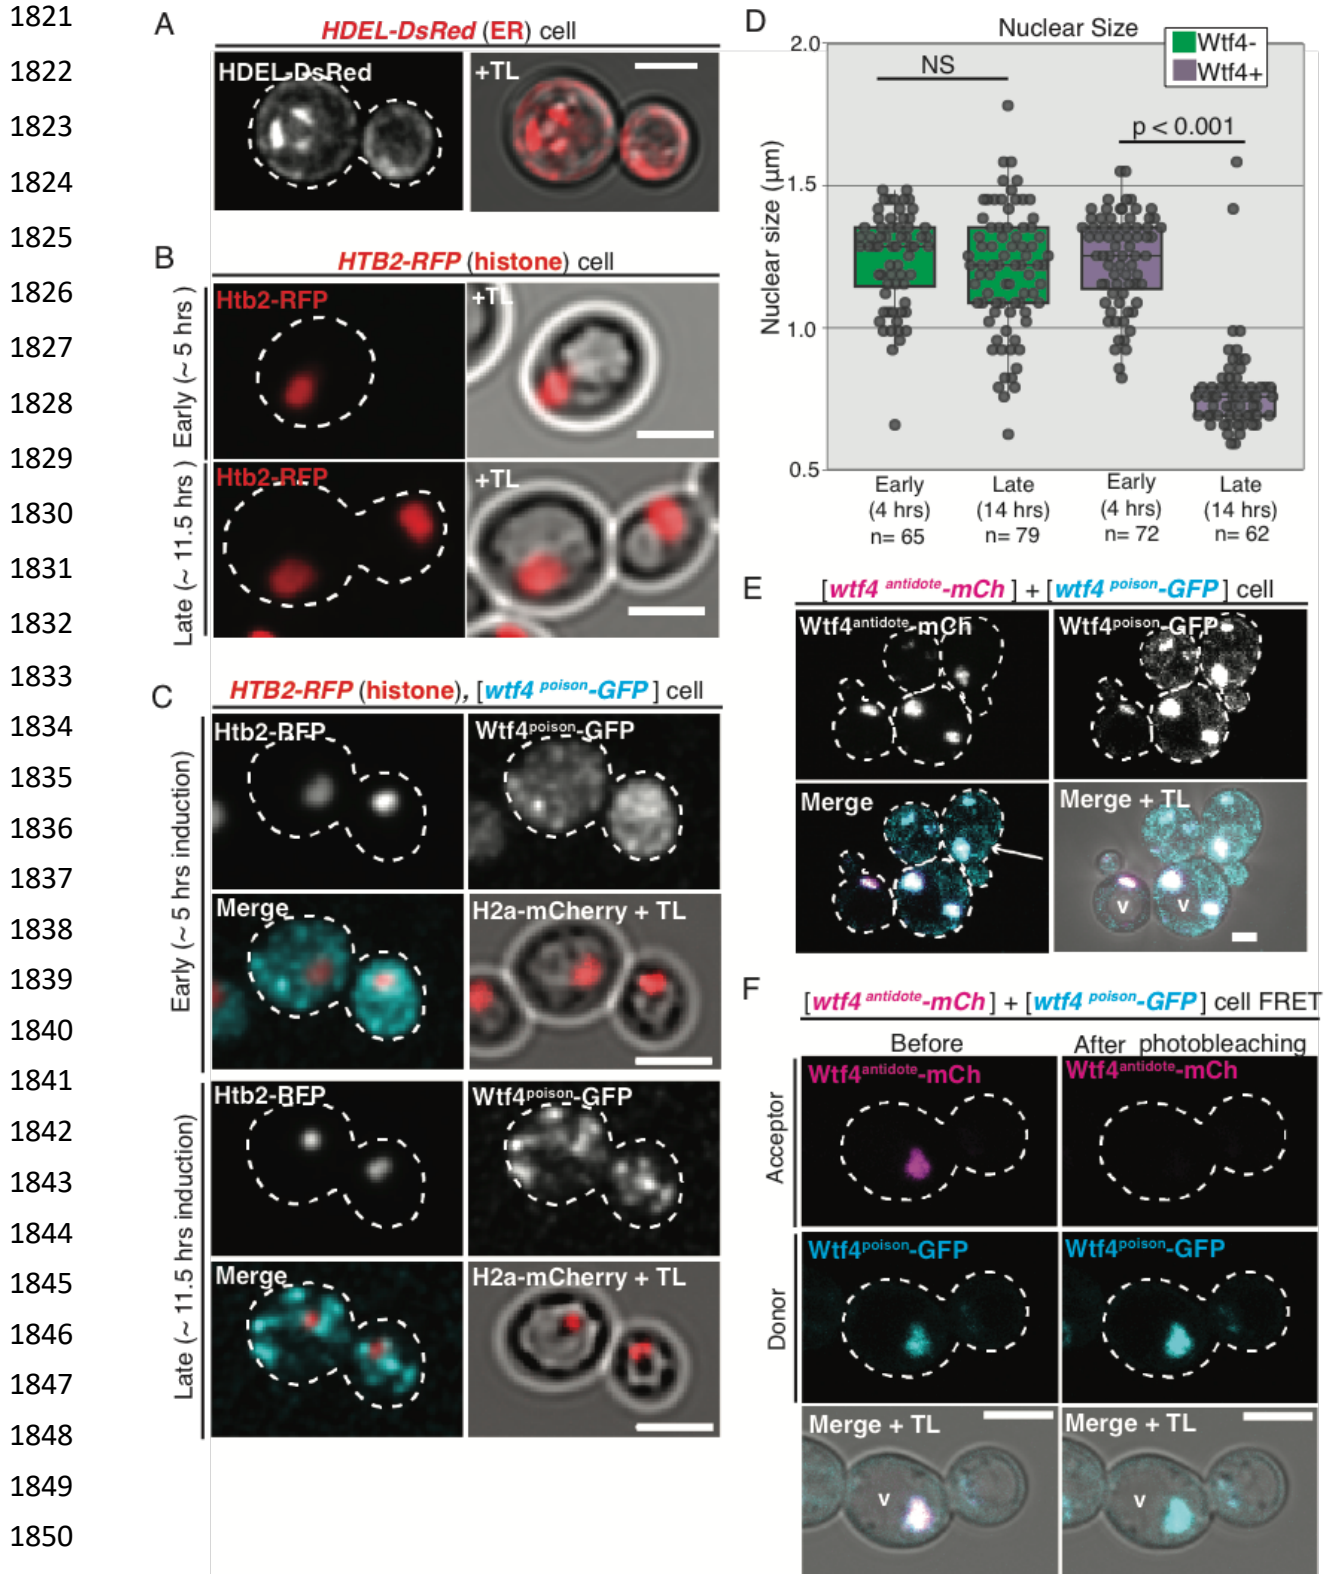

1852 **Figure 2- figure supplement 1. *Wtf4*<sup>poison</sup> toxicity and *Wtf4*<sup>antidote</sup> neutralization function in**  
 1853 ***S. cerevisiae*.** (A) A vegetatively growing cell with an integrated HDEL-DsRed allele acting as



1854 an endoplasmic reticulum (ER) marker (red in merged image) imaged 4 hours after induction in  
1855 SC galactose media. (B) A cell containing an integrated *HTB2-RFP* histone marker (red) ~5  
1856 hours and ~11.5 after switching to SC galactose (inducing) media. (C) A cell containing the  
1857 *HTB2-RFP* histone marker (red in merged images) and carrying a [*URA3*] vector with a  
1858 galactose inducible *wtf4<sup>poison</sup>-GFP* allele (cyan in merged images) ~5 hours and ~11.5 after  
1859 switching to SC galactose (inducing) media. (D) Quantification of nuclear size ( $\mu\text{m}$ ) in wild-type  
1860 cells and in cells carrying the [*URA3*] vector with the galactose inducible *wtf4<sup>poison</sup>-GFP* allele 4  
1861 and 14 hours after being placed in SC galactose (inducing) media ( $p < 0.01$ , t-test, ns= not  
1862 significant). (E) A cell carrying both a [*TRP1*] vector with a  $\beta$ -estradiol inducible *wtf4<sup>antidote</sup>-*  
1863 *mCherry* allele and a [*URA3*] vector with a  $\beta$ -estradiol inducible *wtf4<sup>poison</sup>-GFP* allele imaged 4  
1864 hours after being placed in 500 nM  $\beta$ -estradiol media. Both Wtf4 proteins colocalize in a large  
1865 puncta next to the vacuole (v), but there is a faint circle of Wtf4<sup>poison</sup>-GFP (cyan in merged  
1866 images) that is devoid of Wtf4<sup>antidote</sup>-mCherry (magenta in merged images, arrow). (F)  
1867 Representative image of Acceptor Photobleaching Fluorescence Resonance Energy Transfer  
1868 (FRET) of Wtf4<sup>poison</sup>-GFP (the donor, cyan) and Wtf4<sup>antidote</sup>-mCherry (the acceptor, magenta)  
1869 before and after photobleaching of Wtf4<sup>antidote</sup>-mCherry in cells carrying both a [*TRP1*] vector  
1870 with a  $\beta$ -estradiol inducible *wtf4<sup>antidote</sup>-mCherry* allele and a [*URA3*] vector with a  $\beta$ -estradiol  
1871 *wtf4<sup>poison</sup>-GFP* allele. FRET was assayed four hours after induction in 500 nM  $\beta$ -estradiol media.  
1872 All scale bars represent 4  $\mu\text{m}$ .

1873

1874

1875

1876

1877

1878

1879

1880

1881

1882

1883

1884

1885

1886



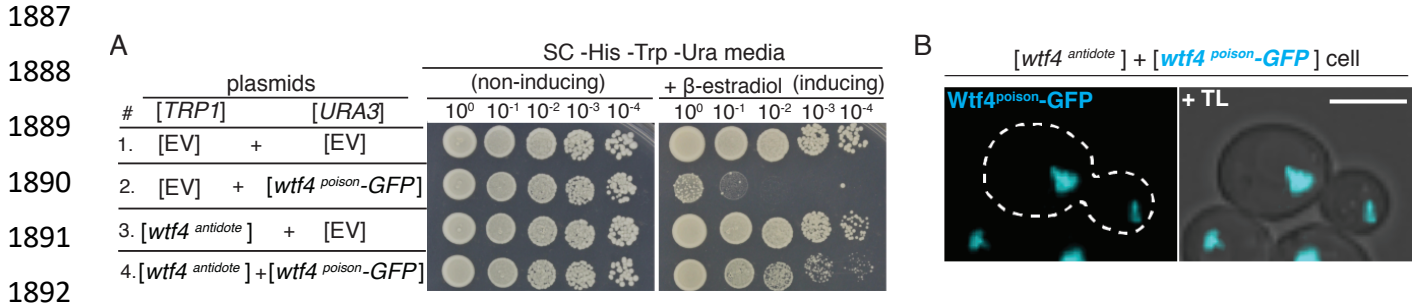

**Figure 2- figure supplement 2. Wtf4<sup>poison</sup> toxicity and Wtf4<sup>antidote</sup> neutralization function in**

**S. cerevisiae.** (A) Spot assay of serial dilutions on non-inducing (SC -His -Trp -Ura) and inducing (SC -His -Trp -Ura + 500 nM  $\beta$ -estradiol) media. Each strain contains [TRP1] and [URA3] ARS CEN plasmids that are either empty (EV) or carry the indicated  $\beta$ -estradiol inducible *wtf4* alleles. (B) A haploid cell carrying a [TRP1] vector with an  $\beta$ -estradiol inducible *wtf4<sup>antidote</sup>* allele and a [URA3] vector with a  $\beta$ -estradiol inducible *wtf4<sup>poison-GFP</sup>* allele (cyan) imaged four hours after induction in 500 nM  $\beta$ -estradiol. Scale bar represents 4  $\mu$ m.

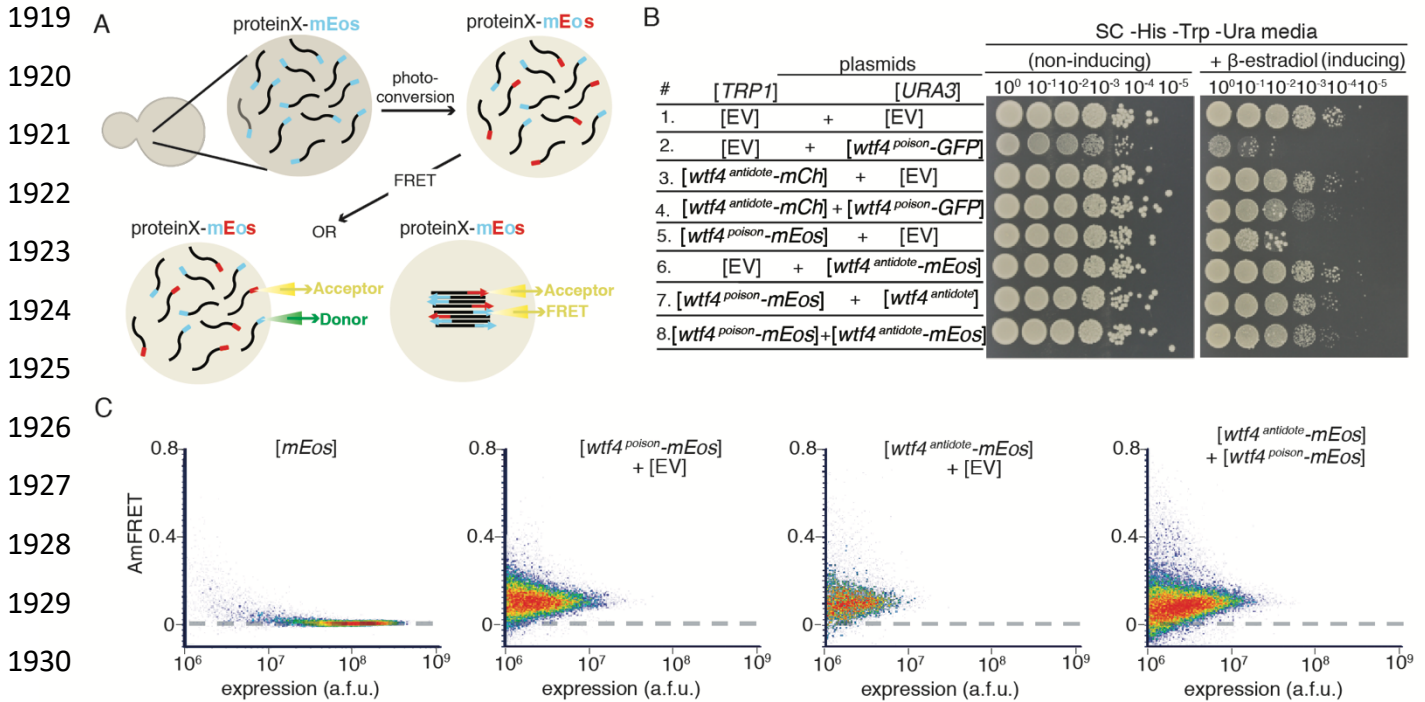

**Figure 2- figure Supplement 3. Wtf4<sup>poison</sup> and Wtf4<sup>antidote</sup> proteins assemble into**

**aggregates.** (A) Model of Distributed Amphifluoric FRET (DAMFRET) assay. (B) Spot assay of serial dilutions on non-inducing (SC -His -Trp -Ura) and inducing (SC -His -Trp -Ura + 500 nM  $\beta$ -estradiol) media. Each strain contains [TRP1] and [URA3] ARS CEN plasmids that are either empty (EV) or carry the indicated  $\beta$ -estradiol inducible *wtf4* alleles. (C) DAMFRET plots of flow cytometry data of cells carrying a [URA3] vector galactose inducible mEos3.1 (control for a monomeric protein population), cells carrying a [TRP1] vector with a  $\beta$ -estradiol inducible *wtf4<sup>poison</sup>-mEos3.1* allele and an empty [URA3] vector, cells carrying a [URA3] vector with a  $\beta$ -estradiol inducible *wtf4<sup>antidote</sup>-mEos3.1* allele and an empty [TRP1] vector, and cells carrying a [URA3] vector with a  $\beta$ -estradiol inducible *wtf4<sup>antidote</sup>-mEos3.1* allele and a [TRP1] vector with a  $\beta$ -estradiol inducible *wtf4<sup>poison</sup>-mEos3.1*. Cells carrying vectors with the  $\beta$ -estradiol inducible Wtf4-mEos3.1 proteins were assayed four hours after induction in 500 nM  $\beta$ -estradiol. Cells carrying the galactose inducible mEos3.1 control were assayed 16 hours after induction in SC galactose media.

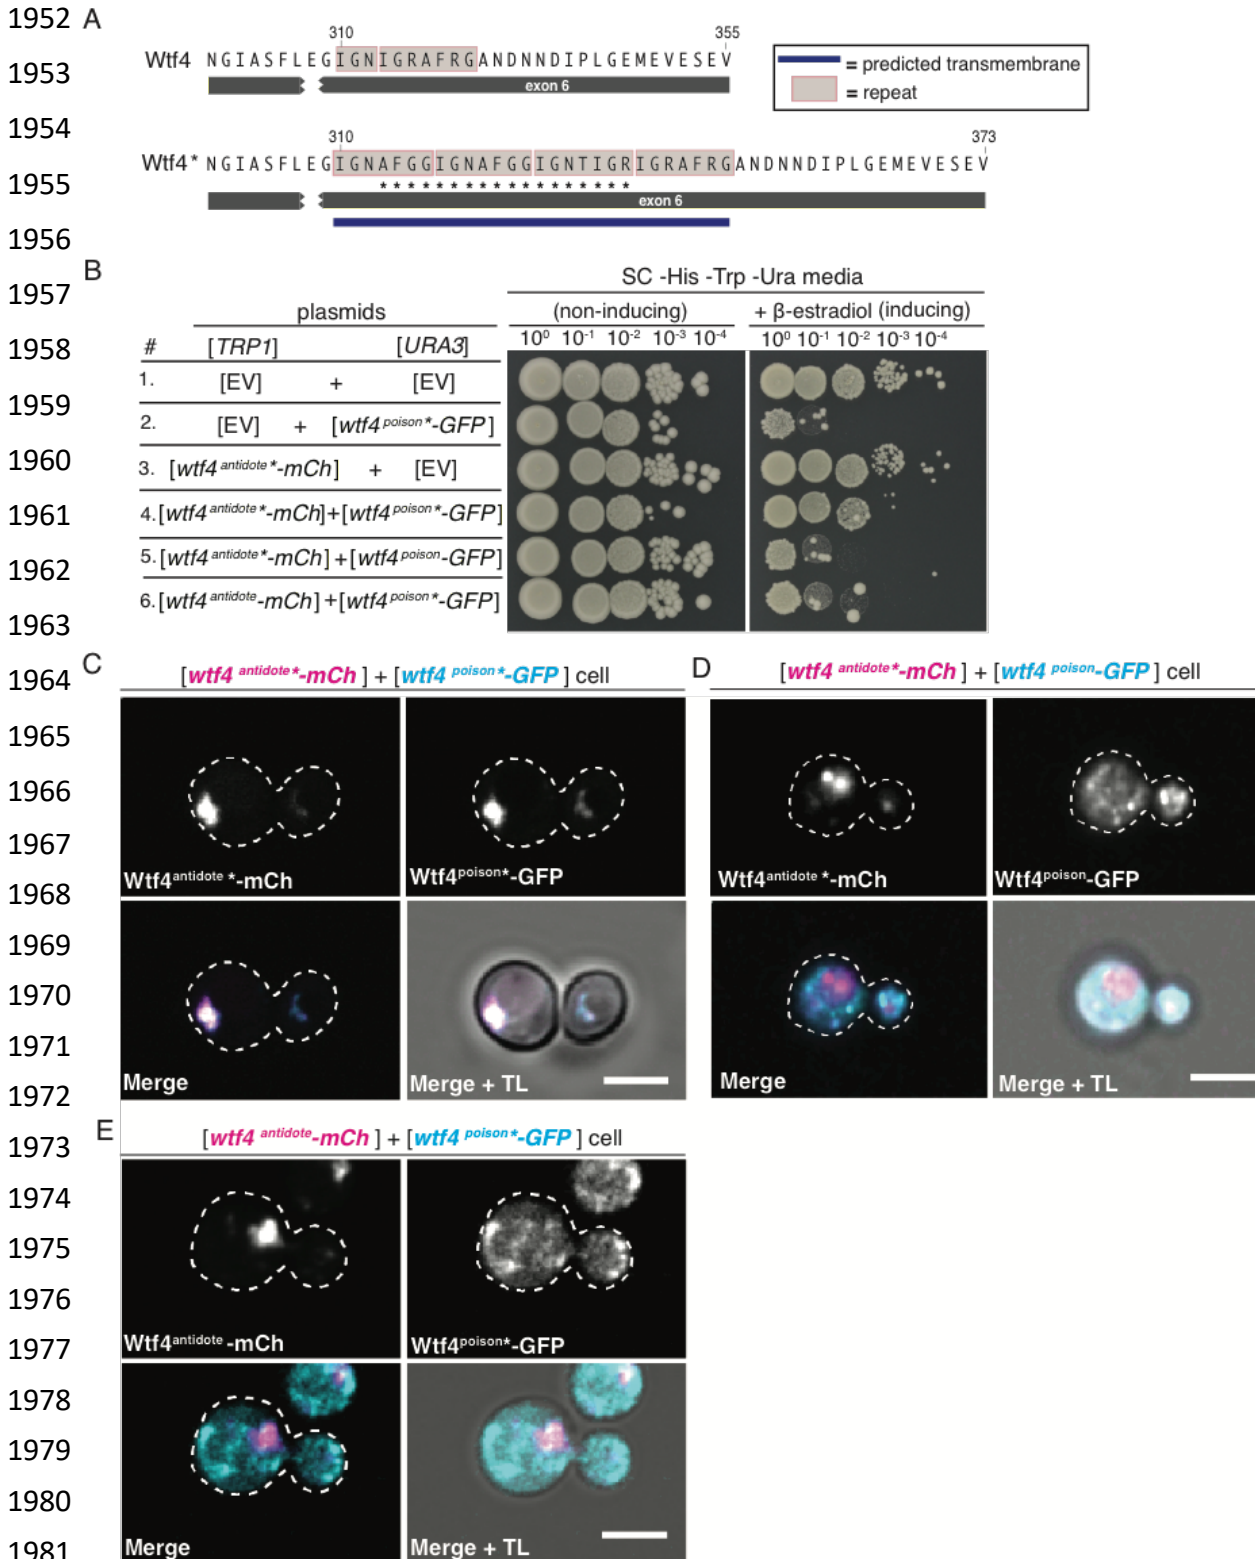

1982 **Figure 3. Homotypic interactions facilitate Wtf4<sup>poison</sup>-Wtf4<sup>antidote</sup> co-assembly and**  
 1983 **Wtf4<sup>antidote</sup> function.** (A) Sequence encoding 18 amino acids (marked with an \*) were added to  
 1984 the repeat sequences within exon 6 of the *wtf4* allele to create *wtf4\** alleles. The addition of the

1985 amino acids introduces another predicted transmembrane domain (depicted by blue line;  
1986 TMHMM model, *Krogh et al., 2001*). (B) Spot assay of serial dilutions on non-inducing (SC -His -  
1987 Trp -Ura) and inducing (SC -His -Trp -Ura + 500 nM  $\beta$ -estradiol) media. Each strain contains  
1988 [*TRP1*] and [*URA3*] ARS CEN plasmids that are either empty (EV) or carry the indicated  $\beta$ -  
1989 estradiol inducible *wtf4* alleles. (C) Representative image of a haploid cell carrying a [*TRP1*]  
1990 vector with a  $\beta$ -estradiol inducible *wtf4<sup>antidote\*</sup>-mCherry* allele (magenta in merged images) and a  
1991 [*URA3*] vector with a  $\beta$ -estradiol inducible *wtf4<sup>poison\*</sup>-GFP* (cyan in merged images). (D)  
1992 Representative image of a haploid cell carrying a [*TRP1*] vector with a  $\beta$ -estradiol inducible  
1993 *wtf4<sup>antidote\*</sup>-mCherry* allele (magenta in merged images) and a [*URA3*] vector with a  $\beta$ -estradiol  
1994 inducible *wtf4<sup>poison\*</sup>-GFP* allele (cyan in merged images). (E) Representative image of a haploid  
1995 cell carrying a [*TRP1*] vector with a  $\beta$ -estradiol inducible *wtf4<sup>antidote\*</sup>-mCherry* allele (magenta in  
1996 merged images) and a [*URA3*] vector with a  $\beta$ -estradiol inducible *wtf4<sup>poison\*</sup>-GFP* allele (cyan in  
1997 merged images). In all experiments, the cells were imaged ~4 hours after induction in 500 nM  $\beta$ -  
1998 estradiol. All scale bars represent 4  $\mu$ m.

1999

2000

2001

2002

2003

2004

2005

2006

2007

2008

2009

2010

2011

2012

2013

2014

2015

2016

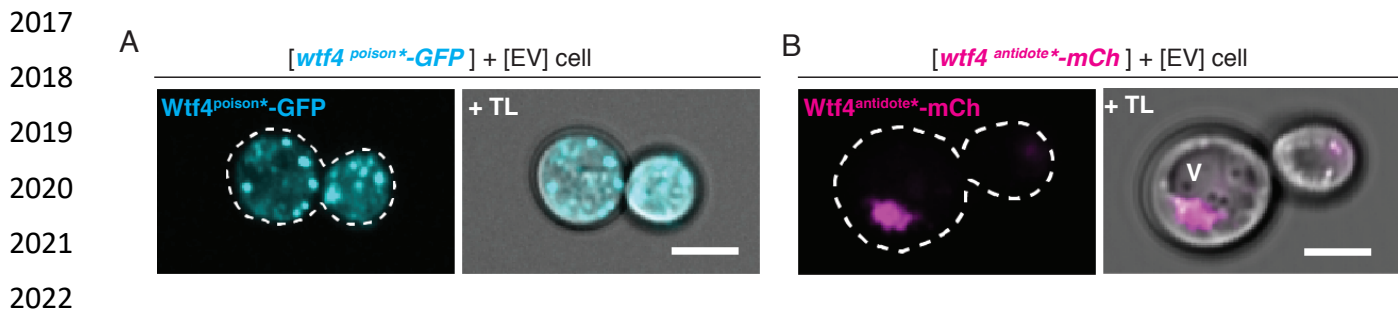

2023 **Figure 3- figure supplement 1. Wtf4<sup>poison\*</sup> and Wtf4<sup>antidote\*</sup> have the same localization as**  
2024 **the wild-type Wtf4 proteins in *S. cerevisiae*** (A) Representative image of a haploid cell  
2025 carrying a [*URA3*] vector with a  $\beta$ -estradiol inducible *wtf4*<sup>poison</sup>-GFP allele (cyan) and an empty  
2026 [*TRP1*] vector. (B) Representative image of a haploid cell with carrying a [*TRP1*] vector with a  $\beta$ -  
2027 estradiol inducible *wtf4*<sup>antidote</sup>-mCherry allele (magenta) and an empty [*URA3*] vector. In both  
2028 experiments, the cells were imaged ~4 hours after induction in 500 nM  $\beta$ -estradiol. All scale  
2029 bars represent 4  $\mu$ m.

2030  
2031  
2032  
2033  
2034  
2035  
2036  
2037  
2038  
2039  
2040  
2041  
2042  
2043  
2044  
2045  
2046  
2047  
2048



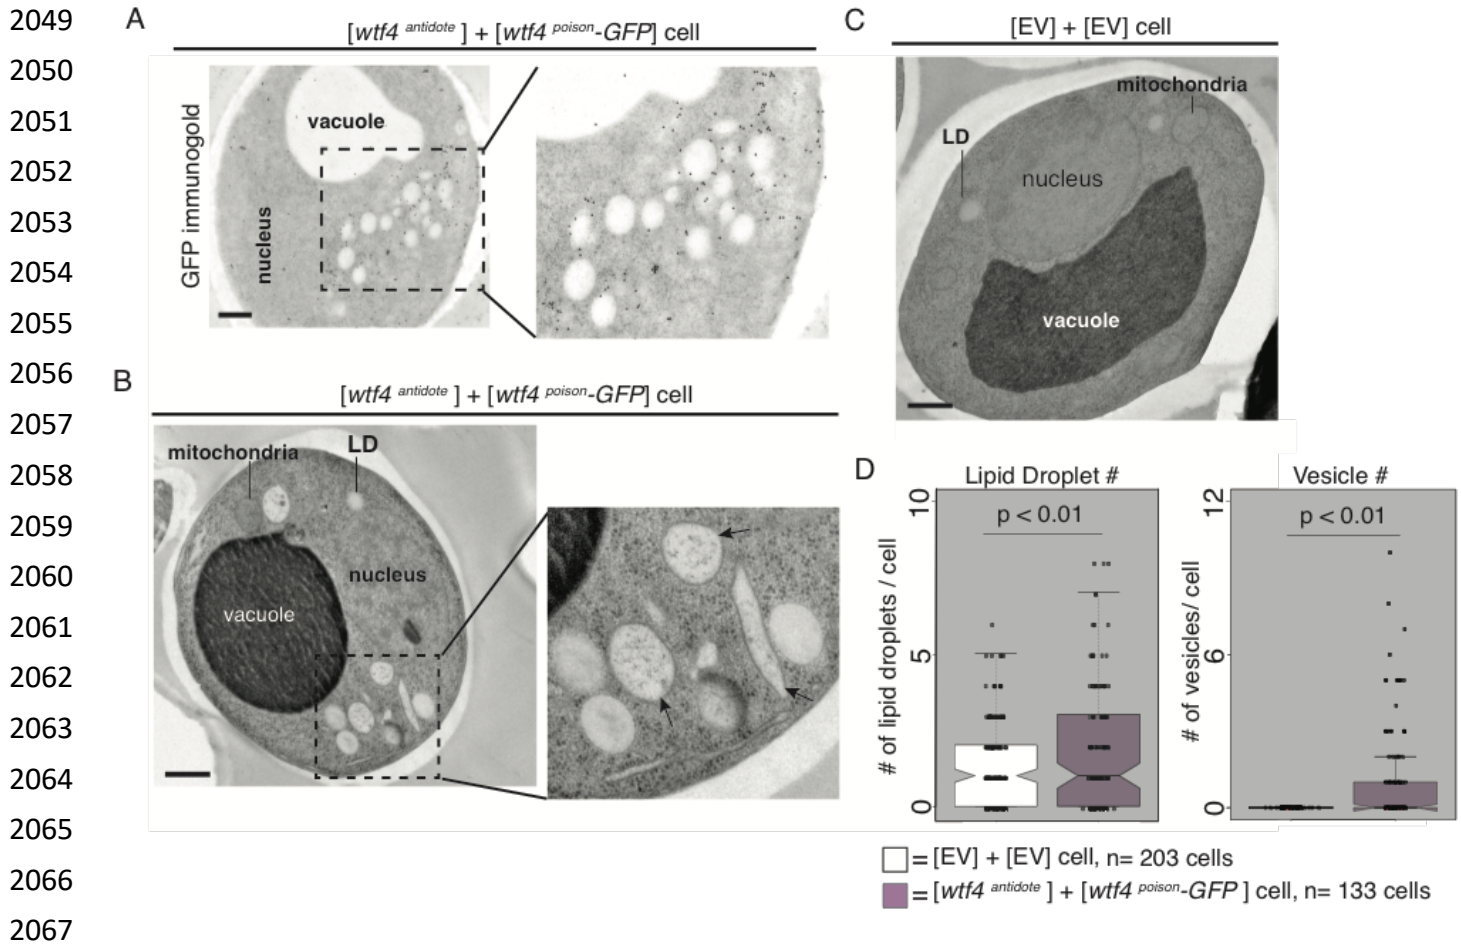

**Figure 4. Cells expressing *Wtf4*<sup>poison</sup> and *Wtf4*<sup>antidote</sup> or *Wtf4*<sup>antidote</sup> have increased vesicles**

**that cluster within the *Wtf4* aggregate.** (A) Representative tomograph of Immuno-gold Transmission Electron Microscopy (TEM) of a haploid cell carrying a [*TRP1*] vector with a  $\beta$ -estradiol inducible *wtf4*<sup>antidote</sup> allele and a [*URA3*] vector with a  $\beta$ -estradiol inducible *wtf4*<sup>poison</sup>-GFP allele. A monoclonal antibody against GFP was used. Immunogold particles (black dots) are enriched in a cluster near light staining organelles. (B) Representative TEM tomograph of a cell carrying a [*TRP1*] vector with a  $\beta$ -estradiol inducible *wtf4*<sup>antidote</sup> allele and a [*URA3*] vector with a  $\beta$ -estradiol inducible *wtf4*<sup>poison</sup>-GFP. Arrows point to vesicle structures. (C) Representative TEM tomograph of a cell carrying an empty [*TRP1*] vector and an empty [*URA3*] vector. (D) Quantification of the number of lipid droplets (left) or vesicles (right) per cell of two samples: 1. Cells carrying empty [*TRP1*] and [*URA3*] vectors (EV, white, n=203 cells) and 2. Cells carrying a [*TRP1*] vector with a  $\beta$ -estradiol inducible *wtf4*<sup>antidote</sup> allele and a [*URA3*] vector with a  $\beta$ -estradiol inducible *wtf4*<sup>poison</sup>-GFP allele (purple, n=133 cells), (p<0.01, t-test). All samples were processed ~4 hours after induction in 500 nM  $\beta$ -estradiol. All scale bars represent 0.5  $\mu$ m. Lipid Droplet=LD.



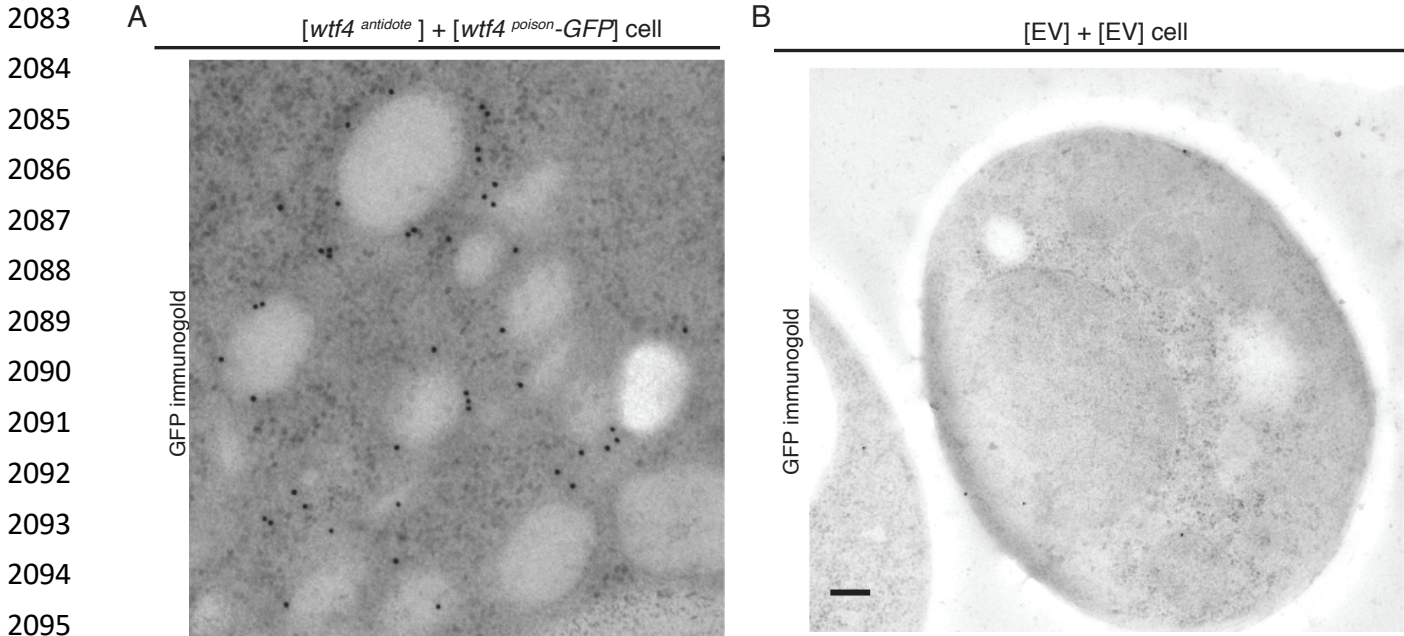

2097 **Figure 4- figure supplement 1. Cells expressing *Wtf4<sup>poison</sup>* and *Wtf4<sup>antidote</sup>* or *Wtf4<sup>antidote</sup>***  
2098 **have increased vesicles that cluster within the *Wtf4* aggregate.** (A) A cropped, magnified  
2099 immuno-gold Transmission Electron Microscopy (TEM) tomograph of a region of a haploid cell  
2100 carrying a [*TRP1*] vector with a  $\beta$ -estradiol inducible *wtf4<sup>antidote</sup>* allele and a [*URA3*] vector with a  
2101  $\beta$ -estradiol inducible *wtf4<sup>poison</sup>-GFP* allele. A mono-clonal antibody against GFP was used.  
2102 Immunogold particles (black dots) are enriched in a cluster near light staining organelles. (B)  
2103 Representative Immuno-gold TEM tomograph of a cell carrying an empty [*TRP1*] vector and an  
2104 empty [*URA3*] vector. The same antibody was used as in A, but very few particles are seen,  
2105 suggesting little background staining is present. Both samples were processed after ~4 hours of  
2106 induction in 500 nM  $\beta$ -estradiol. Scale bar represents 0.2  $\mu$ m.

2107  
2108  
2109  
2110  
2111  
2112  
2113  
2114  
2115  
2116

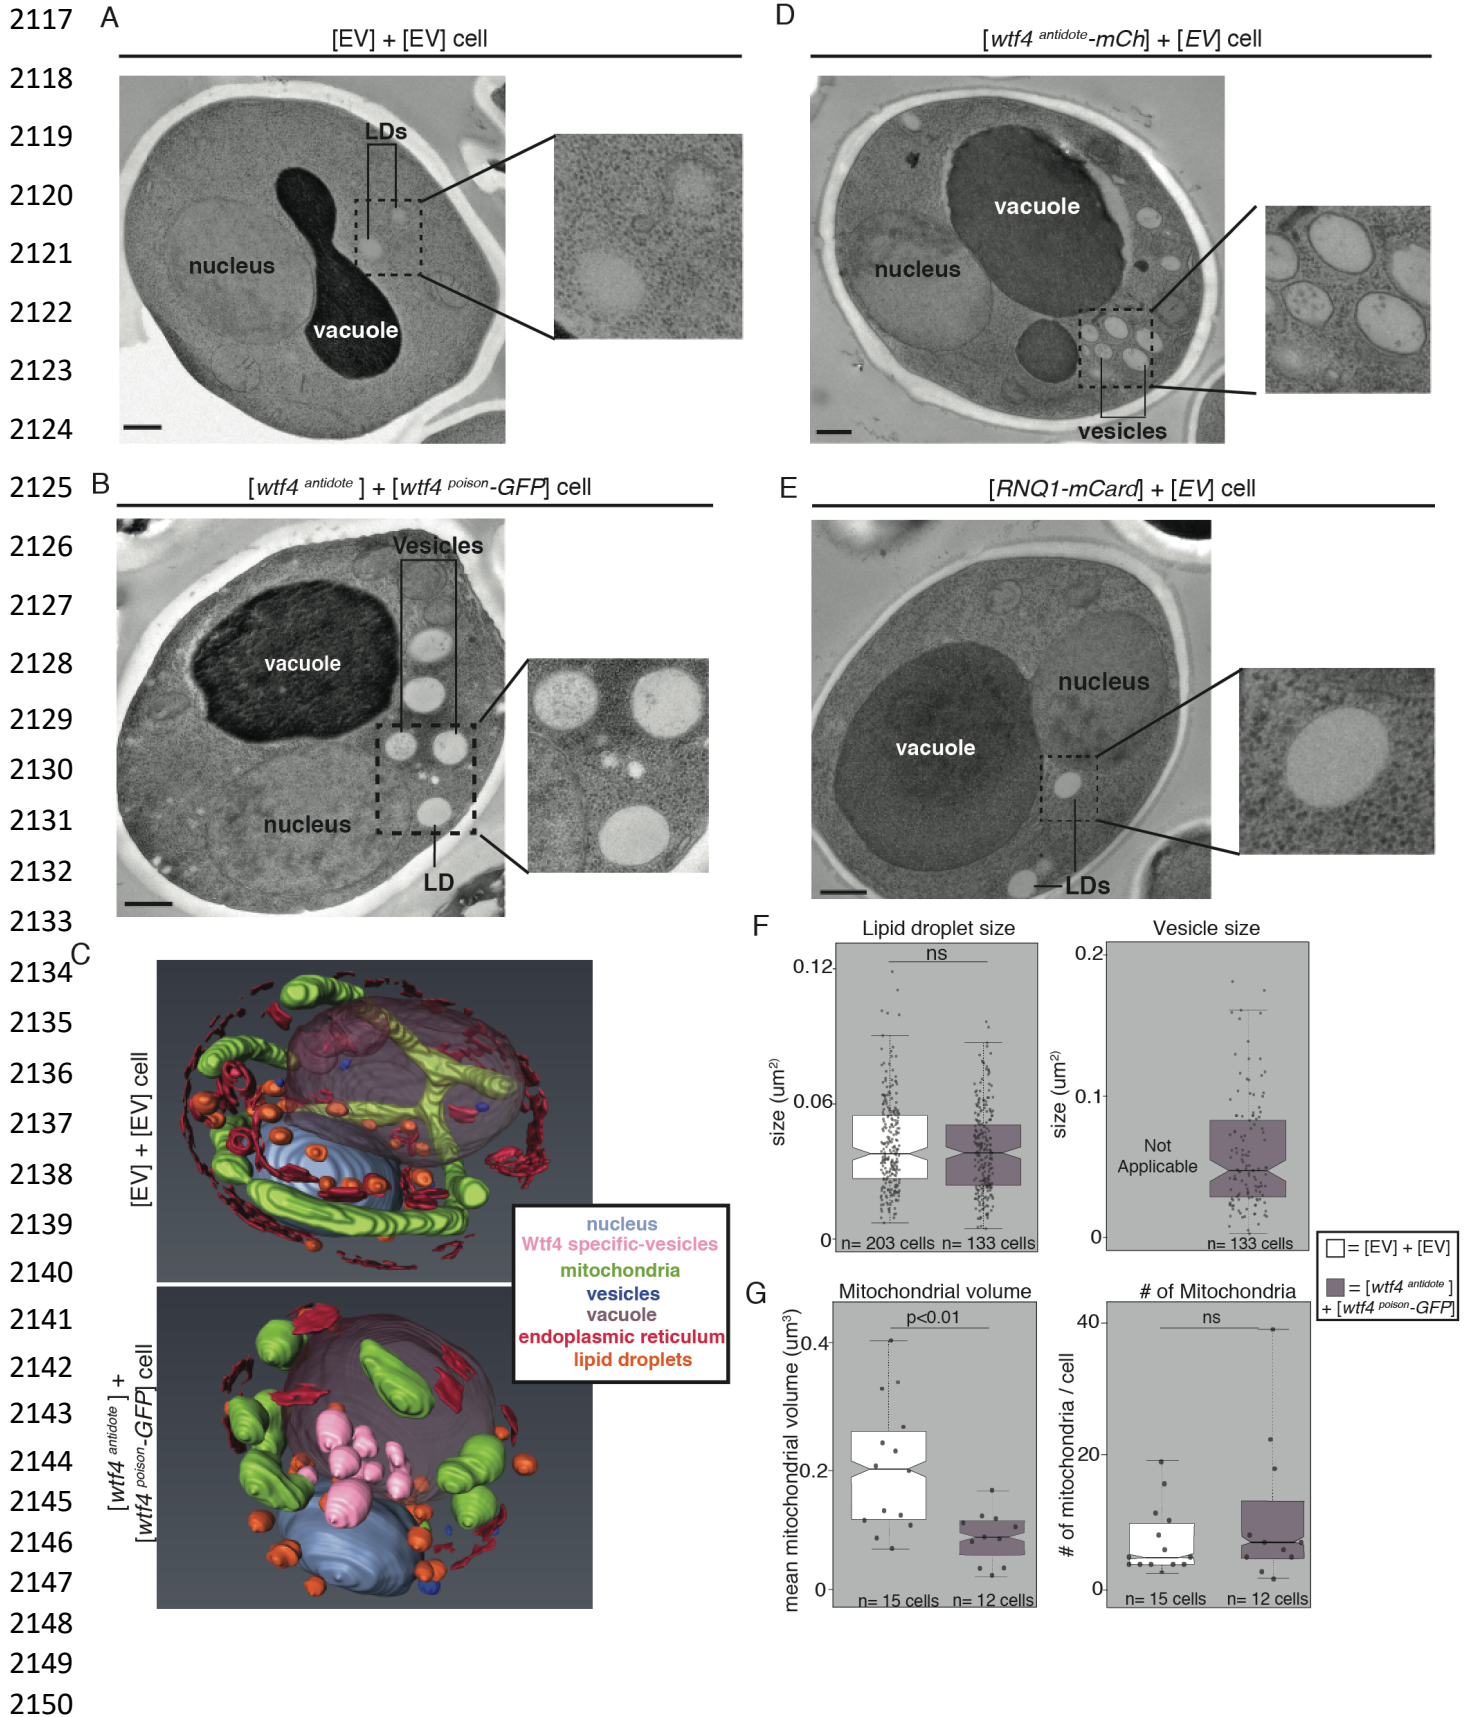

2151 **Figure 4- figure supplement 2. Cells expressing  $Wtf4^{poison}$  and  $Wtf4^{antidote}$  or  $Wtf4^{antidote}$**   
2152 **have increased vesicles that cluster within the  $Wtf4$  aggregate.** (A) Transmission Electron  
2153 Microscopy (TEM) tomograph of a haploid cell carrying an empty [*TRP1*] vector and an empty  
2154 [*URA3*] vector. (B) TEM tomograph of a haploid cell carrying a [*TRP1*] vector with a *wtf4<sup>antidote</sup>*  
2155 allele and a [*URA3*] vector with a *wtf4<sup>poison</sup>-GFP* allele. (C) Models generated using array  
2156 tomography, a process that utilizes serial slices and Scanning Electron Microscopy (SEM) to  
2157 generate a 3D reconstruction of the cell. Top is the reconstruction of a haploid cell carrying an  
2158 empty [*TRP1*] vector and an empty [*URA3*] vector. The bottom is the 3D reconstruction of a  
2159 haploid cell carrying a [*TRP1*] vector with a *wtf4<sup>antidote</sup>* allele and a [*URA3*] vector with a *wtf4<sup>poison</sup>-*  
2160 *GFP* allele. The key shows the colors representative of the cellular structures in the images. (D)  
2161 TEM tomograph of a haploid cell carrying a [*TRP1*] vector with a *wtf4<sup>antidote</sup>-mCherry* allele and  
2162 an empty [*URA3*] vector. (E) TEM tomograph of a haploid cell carrying a [*TRP1*] vector with a  
2163 *RNQ1-mCardinal* allele and a [*URA3*] vector with a *wtf4<sup>poison</sup>-GFP* allele. (F) Quantification of the  
2164 size of lipid droplets (left) or vesicles (right) in two samples: cells carrying an empty [*TRP1*]  
2165 vector and an empty [*URA3*] vector (EV, white, n=203) and cells carrying a [*TRP1*] vector with a  
2166 *wtf4<sup>antidote</sup>* allele and a [*URA3*] vector with a *wtf4<sup>poison</sup>-GFP* allele (purple, n=133 cells). (G)  
2167 Quantification of the average volume of mitochondria per cell (left) or number of mitochondria  
2168 per cell (right) in two samples: cells carrying an empty [*TRP1*] vector and an empty [*URA3*]  
2169 vector (EV, white, n=15 cells) and cells carrying a [*TRP1*] vector with a *wtf4<sup>antidote</sup>* allele and a  
2170 [*URA3*] vector with a *wtf4<sup>poison</sup>-GFP* allele (purple, n=12 cells). (ns= not significant) ( $p < 0.01$ , t-  
2171 test). All samples were processed after ~4 hours of induction in 500 nM  $\beta$ -estradiol. Scale bar  
2172 represents 0.5  $\mu\text{m}$ .

2173

2174

2175

2176

2177

2178

2179

2180

2181

2182

2183

2184



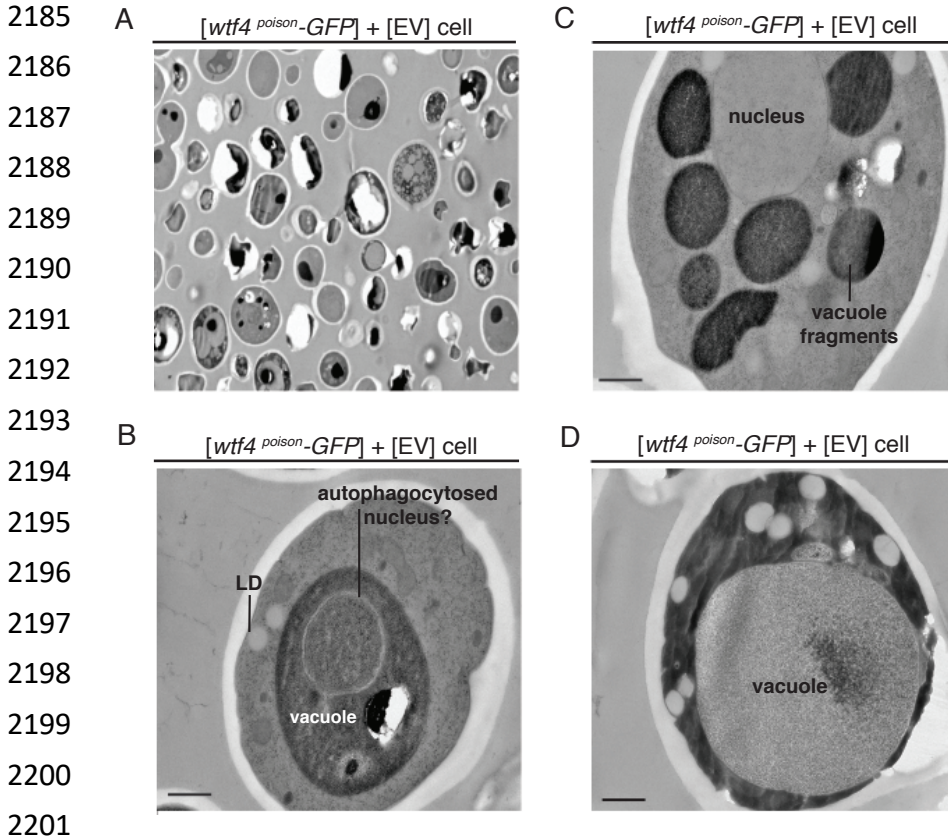

2202 **Figure 4- figure supplement 3. Cells expressing only *Wtf4<sup>poison</sup>* have variable phenotypes.**

2203 (A-D) are representative Transmission Electron Microscopy (TEM) tomographs of cells carrying  
2204 a vector with a [*URA3*] vector with a  $\beta$ -estradiol inducible *wtf4<sup>poison</sup>-GFP* and an empty [*TRP1*]  
2205 vector. Cells were processed four hours after induction with 500 nM  $\beta$ -estradiol. (A) TEM  
2206 micrograph at a lower magnification, showing a field of cells. Many of the cells appear dead and  
2207 have lost integrity through the TEM process. There are few cells surviving long enough to have  
2208 recognizable phenotypes. We grouped the remaining cells into phenotype classes listed in B-D.  
2209 (B) One phenotype of the remaining cells is increased autophagy. The cell shown has an  
2210 organelle, presumed to be the nucleus, inside the darker staining vacuole. (C) Some cells show  
2211 numerous, fragmented vacuoles. (D) Others show enlarged vacuoles, with minimal, darker  
2212 staining cytoplasm. All scale bars represent 0.5  $\mu$ m. LD= lipid droplet.

2213  
2214  
2215  
2216  
2217  
2218

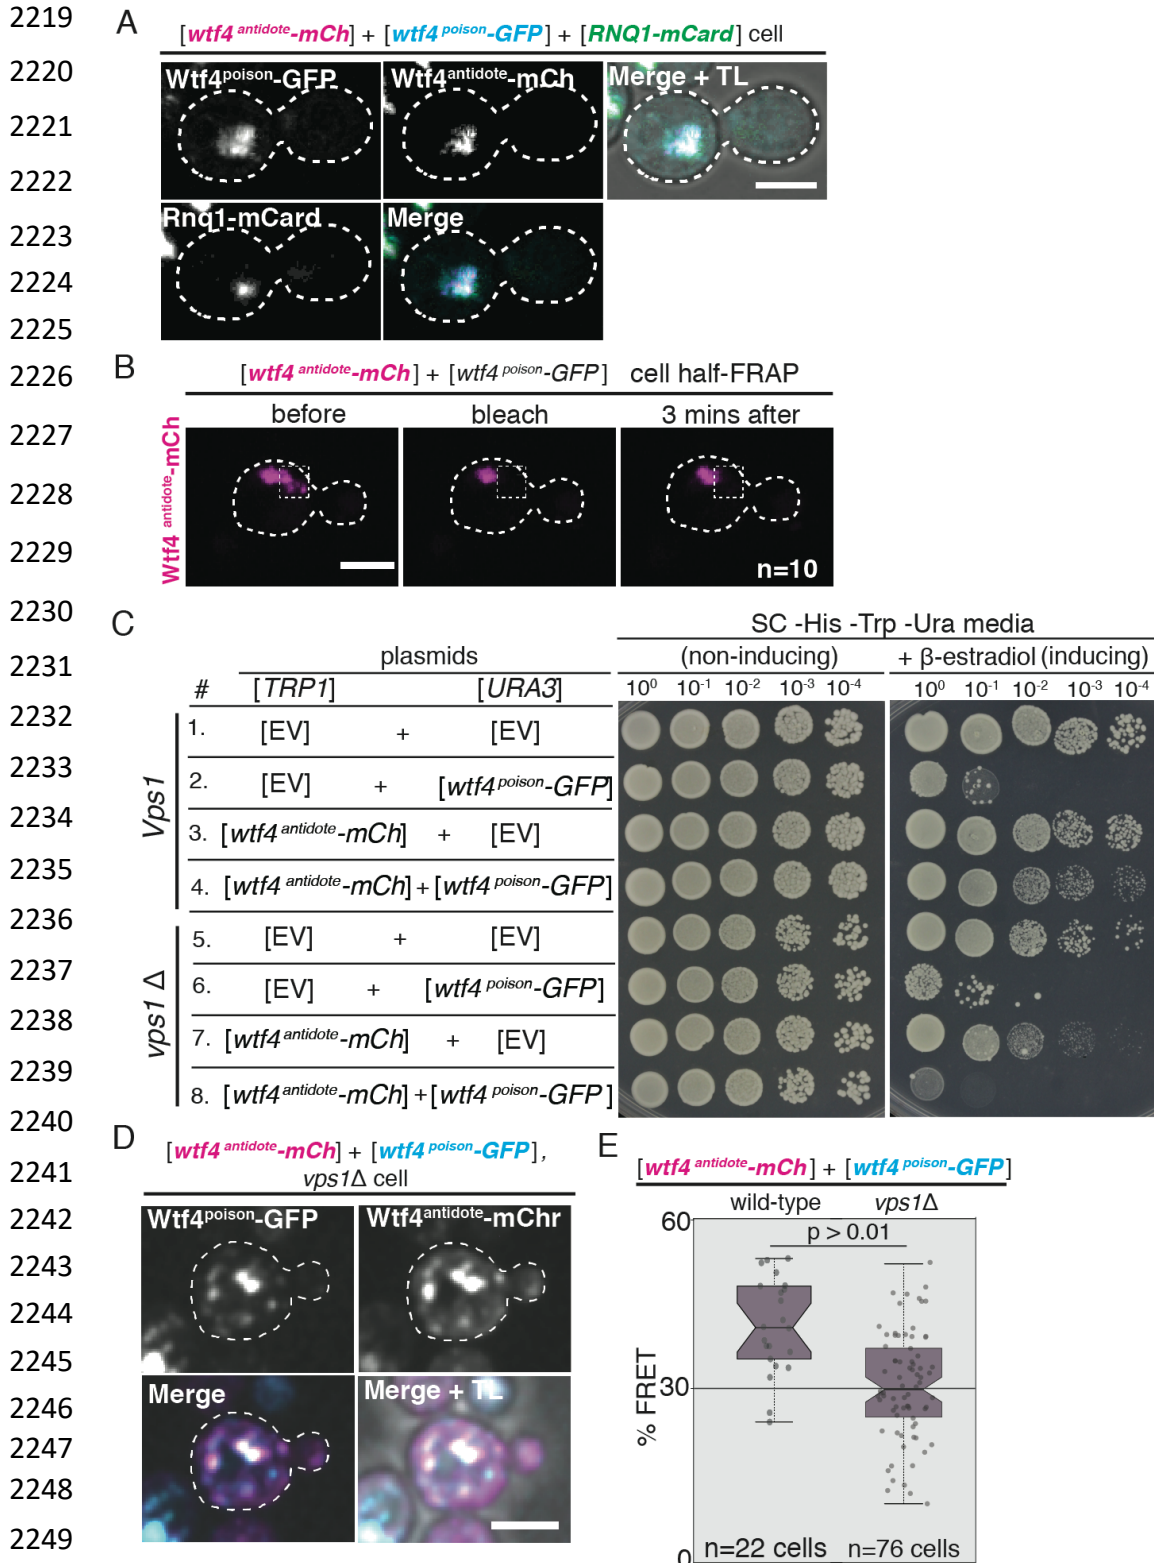

2250 **Figure 5. The Wtf4 proteins colocalize at the Insoluble Protein Deposit (IPOD).** (A)

2251 Representative image of a vegetatively growing haploid cell carrying a [TRP1] vector with a  $\beta$ -

2252 estradiol inducible  $wtf4^{antidote-mCherry}$  (magenta in merged images) allele, a [URA3] vector with

2253 a  $\beta$ -estradiol inducible *wtf4<sup>poison</sup>-GFP* (cyan) allele, and a [*LEU2*] vector with a  $\beta$ -estradiol  
2254 inducible *RNQ1-mCardinal* allele, acting as an IPOD marker (green in merged images). (B) half-  
2255 Fluorescence Recovery After Photobleaching (half-FRAP) of the *Wtf4<sup>antidote</sup>-mCherry* aggregate  
2256 in cells carrying a [*TRP1*] vector with a  $\beta$ -estradiol inducible *wtf4<sup>antidote</sup>-mCherry* (magenta) allele  
2257 and a [*URA3*] vector with a  $\beta$ -estradiol inducible *wtf4<sup>poison</sup>-GFP* allele. Cells were imaged for 3  
2258 minutes after bleaching and no recovery of mCherry fluorescence was seen. (C) Spot assay of  
2259 serial dilutions on non-inducing inducing (SC -His -Trp -Ura) and inducing (SC -His -Trp -Ura +  
2260 500 nM  $\beta$ -estradiol) media of both wild-type (top, samples 1-4) and *vps1 $\Delta$*  (bottom, samples 5-8)  
2261 cells. Each strain contains [*TRP1*] and [*URA3*] ARS CEN plasmids that are either empty (EV) or  
2262 carry the indicated  $\beta$ -estradiol inducible *wtf4* alleles. (D) Representative image of a vegetatively  
2263 growing, haploid *vps1 $\Delta$*  cell carrying a [*URA3*] vector with a  $\beta$ -estradiol inducible *wtf4<sup>poison</sup>-GFP*  
2264 allele (cyan in merged images) and a [*TRP1*] vector with a  $\beta$ -estradiol inducible *wtf4<sup>antidote</sup>-*  
2265 *mCherry* (magenta in merged images) allele. All fluorescence microscopy images acquired after  
2266 ~4 hours in 500 nM  $\beta$ -estradiol media. All scale bars represent 4  $\mu$ m. (E) Quantification of FRET  
2267 values of *Wtf4<sup>antidote</sup>-mCherry* and *Wtf4<sup>poison</sup>-GFP* measured in wild-type (same data as figure  
2268 2G) and *vps1 $\Delta$*  cells carrying vectors with  $\beta$ -estradiol inducible *wtf4<sup>antidote</sup>-mCherry* allele and  $\beta$ -  
2269 estradiol inducible *wtf4<sup>poison</sup>-GFP* allele (p >0.01, t-test).

2270

2271

2272

2273

2274

2275

2276

2277

2278

2279

2280

2281

2282

2283

2284

2285

2286



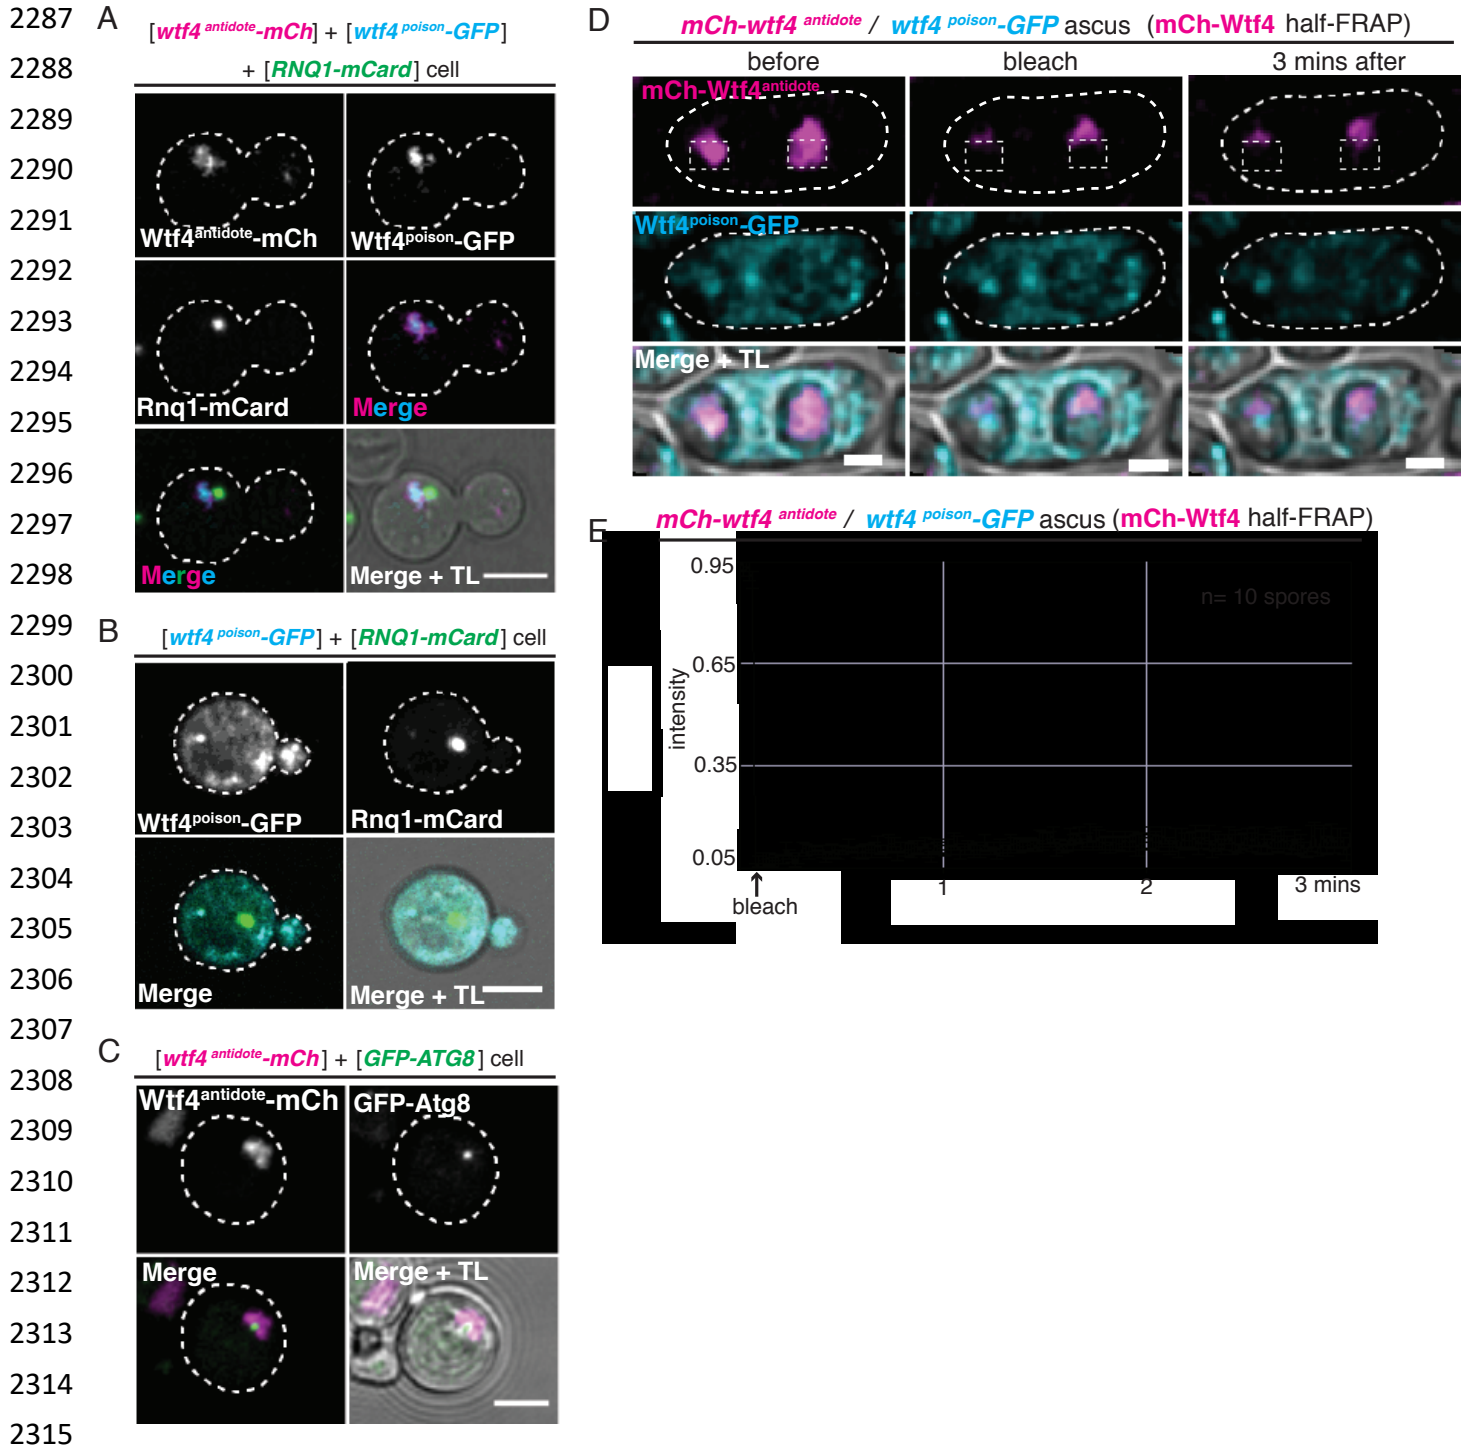

2316 **Figure 5- figure supplement 1. The Wtf4 proteins colocalize at the Insoluble Protein**  
 2317 **Deposit (IPOD).** (A) Representative image of a cell carrying a  $[URA3]$  vector with a  $\beta$ -estradiol  
 2318 inducible  $wtf4^{poison-GFP}$  allele, a  $[TRP1]$  vector with a  $\beta$ -estradiol inducible  $wtf4^{antidote-mCherry}$   
 2319 allele (magenta in merged images), and a  $[LEU2]$  vector with a  $\beta$ -estradiol inducible  $RNQ1-$   
 2320  $mCardinal$  allele (green in merged images) acting as an IPOD marker. The images were

2321 acquired after ~4 hours in 500 nM  $\beta$ -estradiol media. (B) Representative image of a cell carrying  
2322 a [*URA3*] vector with a  $\beta$ -estradiol inducible *wtf4<sup>poison</sup>-GFP* allele (cyan in merged images), an  
2323 empty [*TRP1*] vector, and a [*LEU2*] vector with a  $\beta$ -estradiol inducible *RNQ1-mCardinal* acting  
2324 as an IPOD marker (green in merged images). Cells were imaged ~4 hours in 500 nM  $\beta$ -  
2325 estradiol media. (C) Representative image of a cell carrying a [*LEU2*] vector with a galactose  
2326 inducible *wtf4<sup>antidote</sup>-mCherry* (magenta in merged images) and a [*URA3*] vector with a *GFP-*  
2327 *ATG8* allele under its endogenous promoter acting as a Pre-Autophagosomal Site (PAS) marker  
2328 (green in merged images). Acquired after ~4 hours in SC galactose media. (D) Representative  
2329 image of half-Fluorescence Recovery After Photobleaching (half-FRAP) of the *Wtf4<sup>antidote</sup>-*  
2330 *mCherry* (magenta) aggregate in asci that were generated from heterozygous *mCherry-*  
2331 *wtf4/wtf4<sup>poison</sup>-GFP* diploids. (E) Quantification of the FRAP data shown in D. Cells were imaged  
2332 for 3 minutes after bleaching and very little recovery was seen, suggesting the *mCherry-*  
2333 *Wtf4<sup>antidote</sup>* protein is stable. All scale bars represent 4  $\mu$ m.

2334

2335

2336

2337

2338

2339

2340

2341

2342

2343

2344

2345

2346

2347

2348

2349

2350

2351

2352

2353

2354

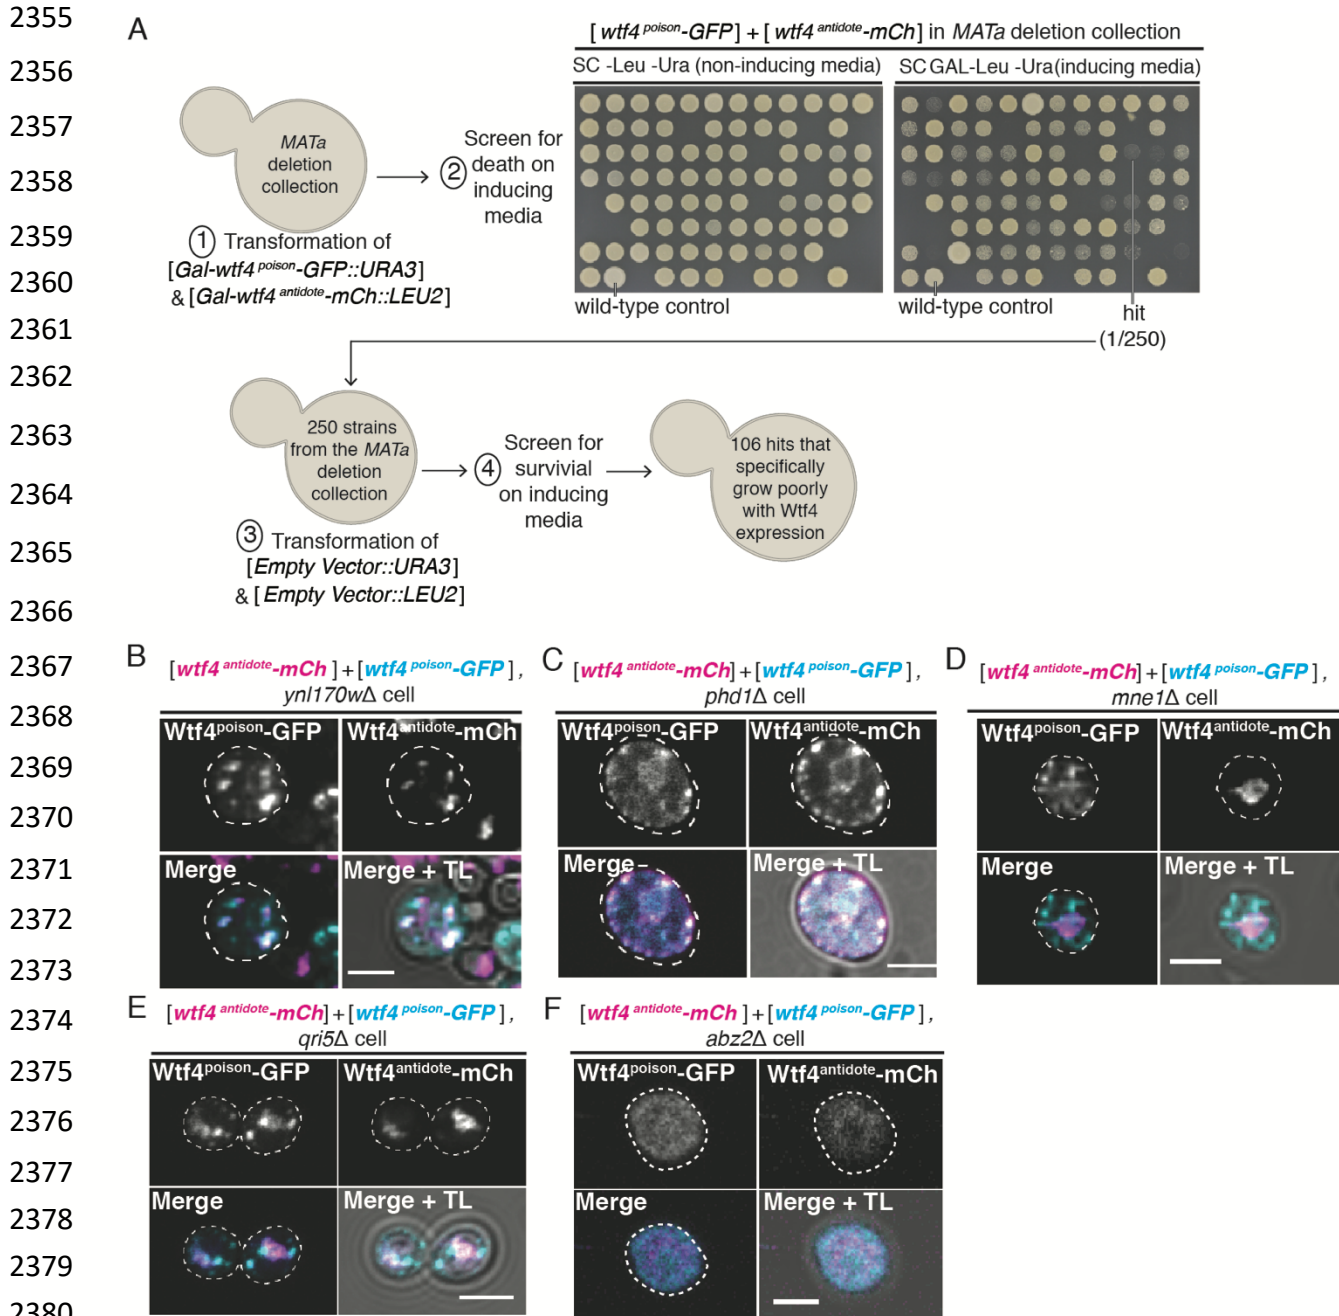

**Figure 5- figure supplement 2. A screen of the *S. cerevisiae* deletion collection to identify**

**genes necessary for survival upon *Wtf4<sup>poison</sup>* and *Wtf4<sup>antidote</sup>* expression.** (A) Cartoon of the

screen designed to identify genes necessary for survival of cells after co-induction of the *Wtf4*

poison and antidote proteins. Representative images of a plate from the screen are included.

The control is a wild-type cell carrying a [ *LEU2* ] vector with a galactose inducible *wtf4<sup>antidote</sup>-*

*mCherry* and a [ *URA3* ] vector with a galactose inducible *wtf4<sup>poison</sup>-GFP* allele. The 250 strains that

showed reduced growth in comparison to the control on SC galactose (inducing) media were

deemed as hits. Those 250 strains were re-assayed from the *MATa* deletion collection with only

2389 [LEU2] and [URA3] empty vectors. (B)-(F) are representative images of vegetatively growing, haploid  
2390 cells carrying a [LEU2] vector with a galactose inducible *wtf4<sup>antidote</sup>-mCherry* (magenta in merged  
2391 images) and a [URA3] vector with a galactose inducible *wtf4<sup>poison</sup>-GFP* allele (cyan in merged  
2392 images). Cells were imaged four hours in galactose (inducing) media. (B) *ynl170wΔ* and (C)  
2393 *phd1Δ* are representative of multiple samples (81/106) that showed the phenotype of the Wtf4  
2394 proteins localizing as dispersed puncta throughout the cell. (D) *mne1Δ*, and (E) *qrl51Δ*, are  
2395 representative of multiple samples (5/106) that showed the phenotype of the Wtf4<sup>antidote</sup>-mCherry  
2396 protein localizing as a puncta, while the Wtf4<sup>poison</sup>-GFP protein looked more dispersed. (F)  
2397 *abz2Δ*, is representative of multiple samples (20/106) that showed the Wtf4<sup>antidote</sup>-mCherry and  
2398 Wtf4<sup>poison</sup>-GFP proteins localizing as a soluble haze throughout the cell. All scale bars represent  
2399 4 μm.

2400

2401

2402

2403

2404

2405

2406

2407

2408

2409

2410

2411

2412

2413

2414

2415

2416

2417

2418

2419

2420

2421

2422

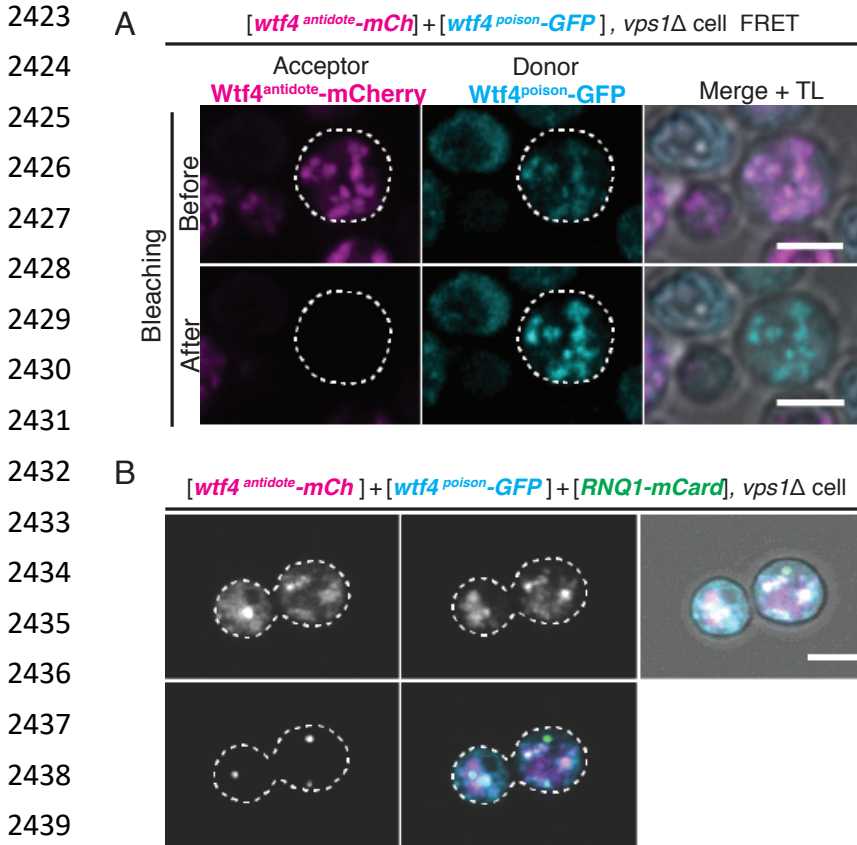

2441 **Figure 5- Figure Supplement 3. Vps1 is necessary for the recruitment of Wtf4 proteins to**  
 2442 **the Insoluble Protein Deposit (IPOD).** (A) Representative image of acceptor photobleaching  
 2443 Fluorescence Resonance Energy Transfer (FRET) of  $Wtf4^{antidote-mCherry}$  and  $Wtf4^{poison-GFP}$  in  
 2444 *vps1Δ* cells carrying a carrying a  $[TRP1]$  vector with a  $\beta$ -estradiol inducible  $wtf4^{antidote-mCherry}$   
 2445 (magenta in merged images) allele and a  $[URA3]$  vector with a  $\beta$ -estradiol inducible  $wtf4^{poison-GFP}$   
 2446 (cyan in merged images) allele. After photobleaching of  $Wtf4^{antidote-mCherry}$  (the acceptor),  
 2447  $Wtf4^{poison-GFP}$  (the donor) signal increases. (B) Representative image of a vegetatively growing  
 2448 haploid *vps1Δ* cell carrying a  $[TRP1]$  vector with a  $\beta$ -estradiol inducible  $wtf4^{antidote-mCherry}$   
 2449 (magenta in merged images) allele, a  $[URA3]$  vector with a  $\beta$ -estradiol inducible  $wtf4^{poison-GFP}$   
 2450 (cyan in merged images) allele, and a  $[LEU2]$  vector with the  $\beta$ -estradiol inducible IPOD  
 2451 marker,  $RNQ1-mCardinal$  (green in merged images). All cells were imaged four hours after  
 2452 induction in 500 nM  $\beta$ -estradiol media. All scale bars represent 4  $\mu$ m.

2453  
 2454  
 2455  
 2456

2457  
2458  
2459  
2460  
2461  
2462  
2463  
2464  
2465  
2466  
2467  
2468  
2469  
2470  
2471  
2472  
2473  
2474  
2475  
2476  
2477  
2478  
2479  
2480  
2481  
2482  
2483  
2484  
2485  
2486  
2487  
2488  
2489  
2490

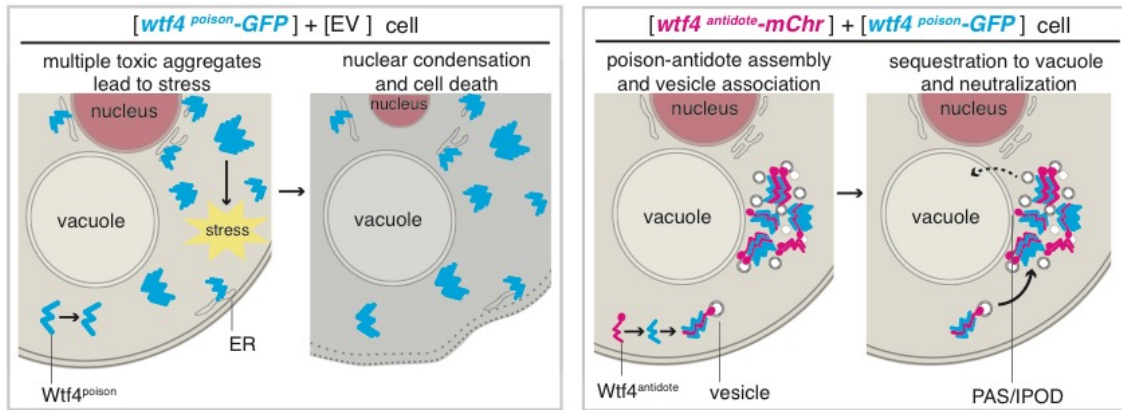

**Figure 6. Model of  $Wtf4^{poison}$  and  $Wtf4^{antidote}$  mechanism in *S. cerevisiae*.**  $Wtf4^{poison}$  assembles into toxic aggregates that spread throughout the cell, causing stress. This stress leads to nuclear condensation and cell death.  $Wtf4^{antidote}$  co-assembles with  $Wtf4^{poison}$ , at least partially driven by shared sequences within the C-terminus. These assemblies are recruited to a vacuole-associated compartment that is associated with vesicles. This sequestration neutralizes the  $Wtf4^{poison}$  toxicity and rescues cell viability.



2491 Supplemental Table 1. Yeast Strains Used

| yeast strains used |         |                                                                                                                                                                      |                        |                                              |                                                                         |
|--------------------|---------|----------------------------------------------------------------------------------------------------------------------------------------------------------------------|------------------------|----------------------------------------------|-------------------------------------------------------------------------|
| strain             | species | genotype                                                                                                                                                             | reference              | construction:                                | used in figure (Fig)                                                    |
| DY11856            | Sp      | <i>h-; leu1-32::tdh1-YFP(leu1+); cpy1-mCherry::hphMX; CFP-atg8::leu1+</i>                                                                                            | L. Sung et al., 2013   | ---                                          | strain construction                                                     |
| GP1163             | Sp      | <i>h-, ade6-52, leu1-32, his5-303</i>                                                                                                                                | from Gerry Smith Lab   | ---                                          | strain construction                                                     |
| GP282              | Sp      | <i>h-, his5-303</i>                                                                                                                                                  | from Gerry Smith Lab   | ---                                          | strain construction                                                     |
| GP850              | Sp      | <i>h+, ura1-61, lys3-37</i>                                                                                                                                          | from Gerry Smith Lab   | ---                                          | strain construction                                                     |
| GP3637             | Sp      | <i>h+, rec12-169::3HA6His-kanmx4, ade6-M210, lys1-37, ura4-D18</i>                                                                                                   | from Gerry Smith Lab   | ---                                          | strain construction                                                     |
| SLJ3340            | Sc      | <i>MATa, ura3-1, his3-11,15, leu2-3,112, trp1-1, ade2-, lys2-, htb2-mCherry::hphMX4</i>                                                                              | from Sue Jaspersen Lab | ---                                          | strain construction                                                     |
| SLJ769             | Sc      | <i>MATa, ura3-1, his3-11,15, leu2-3,112, trp1-1, ADE2, LYS2</i>                                                                                                      | from Sue Jaspersen Lab | ---                                          | strain construction                                                     |
| SO4857             | Sp      | <i>mid1-GFP::ura4+; pBip1-mCherry-AHDL::leu1+ ura4-D18; leu1-32; ade6-x</i>                                                                                          | Zhang et al., 2012     | ---                                          | strain construction                                                     |
| SZY13              | Sp      | WT <i>S. kambucha</i>                                                                                                                                                | Singh and Klar, 2002   | ---                                          | strain construction                                                     |
| SZY44              | Sp      | <i>h-, lys4-95</i>                                                                                                                                                   | Nuckolls et al., 2017  | ---                                          | strain construction, Fig 1-Fig Supp 2B; Fig 1-Fig Supp 4B               |
| SZY504             | Sp      | <i>h?, lys1-37, ade6-m210</i>                                                                                                                                        | this study             | from a cross between GP1163 and GP282        | strain construction                                                     |
| SZY643             | Sp      | <i>h90, leu1-32, ura4-D18</i>                                                                                                                                        | Nuckolls et al., 2017  | ---                                          | strain construction                                                     |
| SZY926             | Sp      | <i>h90, leu1-32, ura4-D18, ade6::G418::ade6-</i>                                                                                                                     | this study             | SZY643 + pSZB188*                            | strain construction                                                     |
| SZY960             | Sp      | <i>h90, leu1-32, ura4-D18, ade6::wtf4-GFP::kanmx4::ade6-</i>                                                                                                         | Nuckolls et al., 2017  | ---                                          | Fig 1D; Fig 1G; Fig 1-Fig Supp 2A                                       |
| SZY1008            | Sp      | <i>h90, leu1-32, ade6::G418::ade6-</i>                                                                                                                               | this study             | from a cross between GP850 and SYZ926        | strain construction                                                     |
| SZY1030            | Sp      | <i>hht1-mRFP::kanmx4, lys1-37</i>                                                                                                                                    | Nuckolls et al., 2017  | ---                                          | Fig 1G; Fig 1-Fig Supp 5A-B                                             |
| SZY1049            | Sp      | <i>h90, leu1-32, ura4-D18, ade6::wtf4<sup>poson</sup>-GFP::kanMX4::ade6-</i>                                                                                         | Nuckolls et al., 2017  | ---                                          | Fig 1C; Fig 1-Fig Supp 1B-D; Fig 1-Fig Supp 4A-C; Fig 5-Fig Supp 1D-E   |
| SZY1099            | Sp      | <i>h90, ura4-D18, leu1-32, ade6::wtf4-GFP::kanmx4::ade6-; pbip1-mCherry-AHDL::leu1+</i>                                                                              | this study             | from a cross between SYZ960 and SO4857       | Fig 1-Fig Supp 2B                                                       |
| SZY1130            | Sp      | <i>h90, leu1-32, ura4-D18, cpy1-mCherry::hphMX</i>                                                                                                                   | this study             | from a cross between DY11856 and SYZ643      | Fig 1D; Fig 1-Fig Supp 2A                                               |
| SZY1142            | Sp      | <i>h90, ura4-d18, his5Δ::ade6+, lys1-37, ade6::mCherry-wtf4::kanmx4::ade6-</i>                                                                                       | Nuckolls et al., 2017  | ---                                          | Fig 1C; Fig 1-Fig Supp 1B-D; Fig 1-Fig Supp 4A; Fig 5-Fig Supp 1D-E     |
| SZY1143            | Sp      | <i>h90, ura4-d18, his5Δ::ade6+, ade6::mCherry-wtf4::kanmx4::ade6-</i>                                                                                                | this study             | from a cross between SYZ1142 and SYZ643      | Fig 1-Fig Supp 3F                                                       |
| SZY1277            | Sp      | <i>h-, his+::sec63-YFP, leu1-32, ade6-m210</i>                                                                                                                       | this study             | see methods                                  | strain construction                                                     |
| SZY1637            | Sc      | <i>MATa, ura3-1, his3-11,15, leu2-3,112, trp1-1, PACT1-LexA-ER-haB42::HIS3</i>                                                                                       | this study             | see methods                                  | strain construction                                                     |
| SZY1766            | Sc      | <i>MATa, ura3-1, his3-11,15, leu2-3,112, trp1-1, PACT1-LexA-ER-haB42::HIS3, [LexA-wtf4<sup>poson</sup>-GFP::URA3], [Empty Vector::TRP1]</i>                          | this study             | SZY1637 + [pSZB585] + [pRS314]               | Fig 2A-B; Fig 2-Fig Supp 1A; Fig 4-Fig Supp 3A-D                        |
| SZY1815            | Sc      | <i>MATa, ura3-1, his3-11,15, leu2-3,112, trp1-1, PACT1-LexA-ER-haB42::HIS3, [LexA-wtf4<sup>antidote</sup>::TRP1], [Empty Vector::URA3]</i>                           | this study             | SZY1637 + [pSZB589] + [pRS316]               | Fig 2-Fig Supp 1A                                                       |
| SZY1818            | Sc      | <i>MATa, ura3-1, his3-11,15, leu2-3,112, trp1-1, PACT1-LexA-ER-haB42::HIS3, [LexA-wtf4<sup>poson</sup>-GFP::URA3], [LexA-wtf4<sup>antidote</sup>::TRP1]</i>          | this study             | SZY1637 + [pSZB585] + [pSZB589]              | Fig 2-Fig Supp 1A-B; Fig 4A-D; Fig 4-Fig Supp 1A-C; Fig 4-Fig Supp 2B-C |
| SZY1821            | Sc      | <i>MATa, ura3-1, his3-11,15, leu2-3,112, trp1-1, PACT1-LexA-ER-haB42::HIS3, [Empty Vector::URA3], [Empty Vector::TRP1]</i>                                           | this study             | SZY1637 + [pRS314] + [pRS316]                | Fig 2-Fig Supp 1A-B; 3B; 4C-D; Fig 4-Fig Supp 1B; Fig 4-Fig Supp 2A-F   |
| SZY1952            | Sc      | <i>MATa, ura3-1, his3-11,15, leu2-3,112, trp1-1, PACT1-LexA-ER-haB42::HIS3, [Empty Vector::URA3], [LexA-wtf4<sup>antidote</sup>-mCherry::TRP1]</i>                   | this study             | SZY1637 + [pRS316] + [pSZB708]               | Fig 2A, Fig 2D, Fig 4-Fig Supp 2D                                       |
| SZY1954            | Sc      | <i>MATa, ura3-1, his3-11,15, leu2-3,112, trp1-1, PACT1-LexA-ER-haB42::HIS3, [LexA-wtf4<sup>poison</sup>-GFP::URA3], [LexA-wtf4<sup>antidote</sup>-mCherry::TRP1]</i> | this study             | SZY1637 + [pSZB585] + [pSZB708]              | Fig 2A, Fig 2E-G, Fig 4-Fig Supp 2B, 4B, Supp 6A                        |
| SZY2059            | Sc      | <i>MATa, ura3-1, his3-11,15, leu2-3,112, trp1-1, PACT1-LexA-ER-haB42::HIS3, [LexA-wtf4<sup>antidote</sup>-mEOS::URA3], [EmptyVector::TRP1]</i>                       | this study             | SZY1637 + [pSZB668] + [pSZB756]              | Fig 2-Fig Supp 3B-C                                                     |
| SZY2070            | Sc      | <i>MATa, ura3-1, his3-11,15, leu2-3,112, trp1-1, PACT1-LexA-ER-haB42::HIS3, [LexA-wtf4<sup>antidote</sup>-mEOS::URA3], [LexA-wtf4<sup>poison</sup>-mEOS::TRP1]</i>   | this study             | SZY1637 + [pSZB732] + [pSZB756]              | Fig 2-Fig Supp 3B-C                                                     |
| SZY2072            | Sc      | <i>MATa, ura3-1, his3-11,15, leu2-3,112, trp1-1, PACT1-LexA-ER-haB42::HIS3, [LexA-wtf4<sup>poison</sup>-mEOS::TRP1], [EmptyVector::URA3]</i>                         | this study             | SZY1637 + [pSZB732] + [pRS316]               | Fig 2-Fig Supp 3B-C                                                     |
| SZY2080            | Sp      | <i>h90, leu1-32</i>                                                                                                                                                  | this study             | selected for popouts of plasmid from SYZ1008 | Fig 1-Fig Supp 3A+A1:F36                                                |

2492

| yeast strains used |         |                                                                                                                                                                                   |            |                                 |                             |
|--------------------|---------|-----------------------------------------------------------------------------------------------------------------------------------------------------------------------------------|------------|---------------------------------|-----------------------------|
| strain             | species | genotype                                                                                                                                                                          | reference  | construction:                   | used in figure (Fig)        |
| SZY2103            | Sc      | MATa, ura3-1, his3-11,15, leu2-3,112, trp1-1, PACT1-LexA-ER-haB42::HIS3, [Empty Vector::URA3], [LexA-wt4antidote*-mCherry::TRP1]                                                  | this study | SZY1637 + [pSZB774] + [pRS316]  | Fig 3A-B, Fig 3-Fig Supp 1B |
| SZY2109            | Sc      | MATa, ura3-1, his3-11,15, leu2-3,112, trp1-1, PACT1-LexA-ER-haB42::HIS3, [LexA-wt4poison-GFP::URA3], [LexA-wt4antidote*-mCherry::TRP1]                                            | this study | SZY1637 + [pSZB585] + [pSZB774] | Fig 3A-B,D                  |
| SZY2159            | Sc      | MATa, ura3-1, his3-11,15, leu2-3,112, trp1-1, PACT1-LexA-ER-haB42::HIS3, [LexA-wt4poison-mEOS::TRP1], [LexA-wt4antidote::URA3]                                                    | this study | SZY1637 + [pSZB782] + [pSZB732] | Fig 2-Fig Supp 3            |
| SZY2424            | Sc      | MATa, ura3-1, his3-11,15, leu2-3,112, trp1-1, PACT1-LexA-ER-haB42::HIS3, [LexA-wt4poison*-GFP::URA3], [Empty Vector::TRP1]                                                        | this study | SZY1637 + [pSZB786] + [pSZB668] | Fig 3B, Fig 3-Fig Supp 1A   |
| SZY2426            | Sc      | MATa, ura3-1, his3-11,15, leu2-3,112, trp1-1, PACT1-LexA-ER-haB42::HIS3, [LexA-wt4poison*-GFP::URA3], [LexA-wt4antidote*-mCherry::TRP1]                                           | this study | SZY1637 + [pSB774] + [pSZ786]   | Fig 3A-C                    |
| SZY2539            | Sc      | MATa, ura3-1, his3-11,15, leu2-3,112, trp1-1, vps1Δ::kanmx4                                                                                                                       | this study | see methods                     | Fig 5C                      |
| SZY2552            | Sc      | MATa, ura3-1, his3-11,15, leu2-3,112, trp1-1, vps1Δ::kanmx4, PACT1-LexA-ER-haB42::HIS3                                                                                            | this study | SZY2539 + FRP718*               | Fig 5C                      |
| SZY2564            | Sc      | MATa, ura3-1, his3-11,15, leu2-3,112, trp1-1, vps1Δ::kanmx4, PACT1-LexA-ER-haB42::HIS3, [Empty Vector::URA3], [Empty Vector::TRP1]                                                | this study | SZY2552 + [pSZB668] + [pSZB670] | Fig 5C                      |
| SZY2566            | Sc      | MATa, ura3-1, his3-11,15, leu2-3,112, trp1-1, vps1Δ::kanmx4, PACT1-LexA-ER-haB42::HIS3, [LexA-wt4poison-GFP::URA3], [Empty Vector::TRP1]                                          | this study | SZY2552 + [pSZB668] + [pSZB585] | Fig 5C                      |
| SZY2568            | Sc      | MATa, ura3-1, his3-11,15, leu2-3,112, trp1-1, vps1Δ::kanmx4, PACT1-LexA-ER-haB42::HIS3, [Empty Vector::URA3], [LexA-wt4antidote-mCherry::TRP1]                                    | this study | SZY2552 + [pSZB670] + [pSZB708] | Fig 5C                      |
| SZY2570            | Sc      | MATa, ura3-1, his3-11,15, leu2-3,112, trp1-1, vps1Δ::kanmx4, PACT1-LexA-ER-haB42::HIS3, [LexA-wt4poison-GFP::URA3], [LexA-wt4antidote-mCherry::TRP1]                              | this study | SZY2552 + [pSZB585] + [pSZB708] | Fig 5C-E, Fig 5-Fig Supp 3A |
| SZY2650            | Sc      | MATa, ura3-1, his3-11,15, leu2-3,112, trp1-1, PACT1-LexA-ER-haB42::HIS3, [LexA-wt4 <sup>poison</sup> *-GFP::URA3], [LexA-wt4 <sup>antidote</sup> -mCherry::TRP1]                  | this study | SZY1637 + [pSZB786] + [pSZB708] | Fig 3A-B,E                  |
| SZY2690            | Sp      | h90, leu1-32::leu1+:adh1pr:Z3EV                                                                                                                                                   | this study | see methods                     | strain construction         |
| SZY2731            | Sc      | MATa, ura3-1, his3-11,15, leu2-3,112, trp1-1, PACT1-LexA-ER-haB42::HIS3, [Empty Vector::URA3], [Empty Vector::TRP1], [LexA-RNQ1-mCardinal::LEU2]                                  | this study | SZY1821 + [pSZB942]             | Fig 4-Fig Supp 2E           |
| SZY2733            | Sc      | MATa, ura3-1, his3-11,15, leu2-3,112, trp1-1, PACT1-LexA-ER-haB42::HIS3, [LexA-wt4poison-GFP::URA3], [LexA-wt4antidote-mCherry::TRP1], [LexA-RNQ1-mCardinal::LEU2]                | this study | SZY1954 + [pSZB942]             | Fig 5A, Fig 5-Fig Supp 1A   |
| SZY2735            | Sc      | MATa, ura3-1, his3-11,15, leu2-3,112, trp1-1, PACT1-LexA-ER-haB42::HIS3, [LexA-wt4 <sup>poison</sup> -GFP::URA3], [Empty Vector::TRP1], [LexA-RNQ1-mCardinal::LEU2]               | this study | SZY1766 + [pSZB942]             | Fig 5-Fig Supp 1B           |
| SZY2740            | Sp      | h90, leu1-32::LEU1:adh1pr:Z3EV, lys4::LexA-wt4antidote-mCherry::hphmx6::lys4-                                                                                                     | this study | SZY2690 + pSZB892*              | Fig 1F, Fig 1-Fig Supp 4C   |
| SZY2878            | Sc      | MATa, ura3-1, his3-11,15, leu2-3,112, trp1-1, vps1Δ::kanmx4, PACT1-LexA-ER-haB42::HIS3, [LexA-wt4poison-GFP::URA3], [LexA-wt4antidote-mCherry::TRP1], [LexA-RNQ1-mCardinal::LEU2] | this study | SZY2570 + [pSZB942]             | Fig 5-Fig Supp 3B           |
| SZY2880            | Sc      | MATa, ura3-1, his3-11,15, leu2-3,112, trp1-1, vps1Δ::kanmx4, PACT1-LexA-ER-haB42::HIS3, [Empty Vector::URA3], [Empty Vector::TRP1], [LexA-RNQ1-mCardinal::LEU2]                   | this study | SZY2564 + [pSZB942]             | Fig 5-Fig Supp 3B           |
| SZY2884            | Sp      | h90, leu1-32::leu1+:adh1pr:Z3EV, ura4:: Empty Vector::kanmx4::ura4-                                                                                                               | this study | SZY2690 + pSZB331*              | Strain construction         |
| SZY2888            | Sp      | h90, leu1-32::leu1+:adh1pr:Z3EV, lys4::LexA-wt4antidote-mCherry::hphmx6::lys4-, ura4::LexA-wt4poison-GFP::kanmx4::ura4-                                                           | this study | SZY2740 + pSZB975*              | Fig 1E, Fig 1-Fig Supp 3E-G |
| SZY2892            | Sp      | h90, leu1-32::leu1+:adh1pr:Z3EV, lys4:: Empty Vector::hphmx6::lys4-, ura4:: Empty Vector::kanmx4::ura4-                                                                           | this study | SZY2884 + pSZB322*              | Fig 1-Fig Supp 3E           |
| SZY2981            | Sc      | MATa, ura3-1, his3-11,15, leu2-3,112, trp1-1, [Empty Vector::URA3], [Empty Vector::LEU2]                                                                                          | this study | SLJ769 + [pRS315] + [pRS316]    | Fig 5-Fig Supp 4B           |
| SZY2983            | Sc      | MATa, ura3-1, his3-11,15, leu2-3,112, trp1-1, [pGAL-wt4poison-GFP::URA3], [Empty Vector::LEU2]                                                                                    | this study | SLJ769 + [pRS315] + [pSZB464]   | Fig 5-Fig Supp 4B           |

2493  
2494  
2495  
2496  
2497  
2498  
2499  
2500  
2501  
2502  
2503  
2504  
2505  
2506  
2507  
2508  
2509  
2510  
2511  
2512  
2513  
2514  
2515  
2516  
2517  
2518  
2519  
2520  
2521  
2522  
2523  
2524  
2525  
2526

| yeast strains used                                                          |         |                                                                                                                                    |            |                                                                                                                                 |                     |
|-----------------------------------------------------------------------------|---------|------------------------------------------------------------------------------------------------------------------------------------|------------|---------------------------------------------------------------------------------------------------------------------------------|---------------------|
| strain                                                                      | species | genotype                                                                                                                           | reference  | construction:                                                                                                                   | used in Figure:     |
| SZY3175                                                                     | Sc      | MATa, ura3-1, his3-11,15, leu2-3,112, trp1-1, PACT1-LexA-ER-haB42::HIS3, HDEL-DsRed::TRP1                                          | this study | SZY1637 + pSJ883*                                                                                                               | Fig 2C              |
| SZY3177                                                                     | Sc      | MATa, ura3-1, his3-11,15, leu2-3,112, trp1-1, PACT1-LexA-ER-haB42::HIS3, HDEL-DsRed::TRP1, [LexA-wtf4poison-GFP::URA3]             | this study | SZY3175 + [pSZB585]                                                                                                             | Fig 2C              |
| SZY3262                                                                     | Sc      | h90, leu1-32::LEU1:adh1pr:Z3EV, lys4::LexA-wtf4antidote-mCherry::hphmx6::lys4-, his5+::sec63-YFP::his5+                            | this study | from a cross between SZY1277 and SZY2740                                                                                        | Fig 1-Fig Supp 3F   |
| SZY3816                                                                     | Sc      | MATa, ura3-1, his3-11,15, leu2-3,112, trp1-1, ade2-, lys2-, htb2-mCherry::hphmx6, [pGAL-wtf4poison-GFP::URA3] [Empty Vector::LEU2] | this study | SLJ3340 + [pSZB464]                                                                                                             | Fig 2-Fig Supp 2B-C |
| SZY3928                                                                     | Sc      | MATa, ura3-1, his3-11,15, leu2-3,112, trp1-1, PACT1-LexA-ER-haB42::HIS3, [pGAL-GFP-ATG8::URA3]                                     | this study | SZY1637 + [GFP-ATG8(416)/GFP-AUT7(416)]                                                                                         | Fig 5-Fig Supp 1C   |
| SZY3962                                                                     | Sc      | MATa, ura3-1, his3-11,15, leu2-3,112, trp1-1, PACT1-LexA-ER-haB42::HIS3, [pGAL-GFP-ATG8::URA3], [pGAL-wtf4antidote-mCherry::LEU2]  | this study | SZY3928 + [pSZB1005]                                                                                                            | Fig 5-Fig Supp 1C   |
| Sc= <i>Saccharomyces cerevisiae</i><br>Sp= <i>Schizosaccharomyces pombe</i> |         |                                                                                                                                    |            | All transformations used 'sleazy' protocol except for those marked * which used standard lithium acetate protocol (see methods) |                     |

2527 **Supplemental Table 2. Plasmids Used**

2528

| plasmids used               |                                                      |                             |
|-----------------------------|------------------------------------------------------|-----------------------------|
| plasmid                     | description                                          | Reference                   |
| P03233DS                    | pBT3-STE::LEU2, bait vector Y2H                      | DUALsystems Biotech         |
| V08_mC                      | pGAL-mCardinal::LEU2                                 | from the Halfmann lab       |
| FRP718                      | PACT1-LexA-ER-haB42::HIS3                            | Ottoz et al., 2014          |
| FRP1642                     | PTEF-TTEF-insul-4LEXABOX-pCYC1::hphMX6               | Ottoz et al., 2014          |
| GFP-ATG8(416)/GFP-AUT7(416) | GFP-ATG8::URA3                                       | Guan et al., 2001           |
| pDK20                       | pGAL::URA3                                           | DasGupta et al., 1998       |
| pDK412                      | pGAL-RNQ1-RFP::LEU2                                  | D. Kryndushkin et al., 2012 |
| pFS461                      | adh1pr:Z3EV::Leu1+                                   | Ohira et al., 2017          |
| pFS478                      | kanMX4::pZ3EV                                        | Ohira et al., 2017          |
| pRS314                      | Empty Vector::TRP1                                   | Sikorski et al., 1989       |
| pRS315                      | Empty Vector::LEU2                                   | Sikorski et al., 1989       |
| pRS316                      | Empty Vector::URA3                                   | Sikorski et al., 1989       |
| pSJ883                      | HDEL-DsRed::TRP1                                     | Friederichs et al., 2011    |
| pYM41                       | pFA6-eYFP-his3MX6                                    | Janke et al., 2004          |
| pSZB188                     | Empty Vector::kanMX4::ade6-                          | Nuckolls et al., 2017       |
| pSZB199                     | wtf4 (coding sequence)::kanMX4::ade6-                | this study                  |
| pSZB203                     | wtf4-GFP::kanMX4::ade6-                              | Nuckolls et al., 2017       |
| pSZB248                     | mcherry-wtf4::kanMX4::ade6-                          | Nuckolls et al., 2017       |
| pSZB257                     | wtf4 <sup>poison</sup> -GFP::kanMX4::ade6-           | Nuckolls et al., 2017       |
| pSZB260                     | wtf4 <sup>antidote</sup> -GFP::kanMX4::ade6-         | this study                  |
| pSZB322                     | Empty Vector::hphMX6::lys4-                          | Bravo Núñez et al., 2018    |
| pSZB331                     | Empty Vector::kanMX4::ura4-                          | Bravo Núñez et al., 2020    |
| pSZB386                     | Empty Vector::hphMX6::ade6-                          | Bravo Núñez et al., 2018    |
| pSZB388                     | pBT3-STE-wtf4 <sup>poison</sup> ::LEU2               | this study                  |
| pSZB392                     | pGAL-wtf4 <sup>poison</sup> ::URA3                   | this study                  |
| pSZB464                     | pGAL-wtf4 <sup>poison</sup> -GFP::URA3               | this study                  |
| pSZB463                     | pGAL-wtf4 <sup>poison</sup> -GFP::TRP1               | this study                  |
| pSZB497                     | pGAL-wtf4 <sup>antidote</sup> ::TRP1                 | this study                  |
| pSZB585                     | LexA-wtf4 <sup>poison</sup> -GFP::URA3               | this study                  |
| pSZB589                     | LexA-wtf4 <sup>antidote</sup> ::TRP1                 | this study                  |
| pSZB668                     | LexA-Empty Vector::TRP1                              | this study                  |
| pSZB670                     | LexA-Empty Vector::URA3                              | this study                  |
| pSZB700                     | LexA-mCherry-wtf4 <sup>antidote</sup> ::TRP1         | this study                  |
| pSZB708                     | LexA-wtf4 <sup>antidote</sup> -mCherry::TRP1         | this study                  |
| pSZB732                     | LexA-wtf4 <sup>poison</sup> -mEOS::TRP1              | this study                  |
| pSZB756                     | LexA-wtf4 <sup>antidote</sup> -mEOS::URA3            | this study                  |
| pSZB774                     | LexA-wtf4 <sup>antidote</sup> *-mCherry::TRP1        | this study                  |
| pSZB782                     | LexA-wtf4 <sup>antidote</sup> ::URA3                 | this study                  |
| pSZB786                     | LexA-wtf4 <sup>poison</sup> *-GFP::URA3              | this study                  |
| pSZB898                     | pGAL-mCardinal::LEU2                                 | this study                  |
| pSZB891                     | wtf4 (coding sequence)-mCherry::kanMX4::ura4-        | this study                  |
| pSZB892                     | LexA-wtf4 <sup>antidote</sup> -mCherry::lys4::hphMX6 | this study                  |
| pSZB942                     | LexA-RNQ1-mCardinal::LEU2                            | this study                  |
| pSZB975                     | LexA-wtf4 <sup>poison</sup> -GFP::ura4::kanMX4       | this study                  |
| pSZB1005                    | pGAL-wtf4 <sup>antidote</sup> -mCherry::LEU2         | this study                  |
| pSZB1120                    | pGAL-wtf4 <sup>antidote</sup> -mEos::URA3            | this study                  |
| rhx1389                     | pGAL-wtf4 <sup>poison</sup> -mEos::URA3              | this study                  |

2529 **Supplemental Table 3. Oligos Used**

2530

2531

| oligos used |                                                                                                                                                        |                                                                                       |
|-------------|--------------------------------------------------------------------------------------------------------------------------------------------------------|---------------------------------------------------------------------------------------|
| oligo       | sequence                                                                                                                                               | description                                                                           |
| 604         | CTGAATATGGAGGCAATGTGCTCTCATC                                                                                                                           | Reverse, in <i>wtf4</i> exon 1                                                        |
| 605         | ATGAAGAATAAAGATTATCCCTTGAGGTCGTCTATGG                                                                                                                  | Forward, start of <i>wtf4</i> exon 1                                                  |
| 606         | TAAACCAGCACCGTCACCGACTTCGCTTTCAACTTCCATTTCCC<br>CC                                                                                                     | Reverse, in <i>wtf4</i> without stop and tail of eGFP                                 |
| 620         | AATATAGGAGCTCAGAAATTCAGTGTGCATGTCAGCTACGCAG                                                                                                            | upstream of <i>wtf4</i> , with SacI tail                                              |
| 613         | GTGCCAACGATAAATAATGACATTCCTTGG                                                                                                                         | Forward, upstream of <i>wtf4</i>                                                      |
| 614         | TTA GACTTCGCTTTCAACTTCCATTTCCC                                                                                                                         | Reverse, the end of <i>wtf4</i> , with SacI tail                                      |
| 633         | AATATAGAGCTCAGAAATTCAGTGTGCATGTCAGCTACGCAG                                                                                                             | Forward, upstream of <i>wtf4</i> , with SacI tail                                     |
| 634         | AATATAGAGCTCCGGGGACGAGGCAAGCTAAAC                                                                                                                      | Reverse, to amplify <i>ADH1</i> terminator, with SacI tail                            |
| 635         | AATATAGAGCTCGTTAAGCATGTGATCTTCATACGACGC                                                                                                                | Reverse, downstream of <i>wtf4</i> , with SacI tail                                   |
| 678         | GCCGAATATCGACTTCTCCAACGGG                                                                                                                              | Reverse, in <i>wtf4</i> exon 2                                                        |
| 679         | GTATCTGAGGATTCAGTACAGGACCTACAG                                                                                                                         | Forward, in <i>wtf4</i> exon 2                                                        |
| 686         | AATATAGGAGCTCTATAATAGATCACAAGGAAAACCTCGCCG<br>AG                                                                                                       | Reverse, downstream of <i>wtf4</i> , with SacI tail                                   |
| 687         | AATATAGGAGCTCCTGCGTAGCTTACATGTTATTGCGATAACATT<br>TCG                                                                                                   | Reverse, downstream of <i>wtf4</i> , with SacI tail                                   |
| 688         | AATATAGGAGCTCGGAAAGCTAAGTTGGGGTAATAAAAAGGG<br>C                                                                                                        | upstream of <i>wtf4</i> , with SacI tail                                              |
| 719         | CTCAATTCATCCATAGACGACCTCAAGGG                                                                                                                          | Reverse, in <i>wtf4</i> exon 1                                                        |
| 735         | CCAAATTTCAAAGTTATTTATTTATATACCTTTCAGAAATTTG<br>GAAATATATTAAGAACTGTATCTGAAG                                                                             | Forward, within intron 1, with mutation for start site                                |
| 736         | CTTCAGATACAGTTTAAATATTTCCAAATTTTCGAAAGGTATA<br>ATAAAATAAATAACTTTTGAAATTTGG                                                                             | Reverse, within intron 1, with mutation for start site                                |
| 916         | ATTAACAAGGCCATTACGGCCATGCTTTCAGAAATTTGAAATA<br>TATTAAGAACTGTATCTGAG                                                                                    | Forward, start of <i>wtf4<sup>Poison</sup></i> , with SfiI tail                       |
| 926         | AACTGATTGGCCGAGGGCGCCGGTTAGACTTCGCTTCAACTTC<br>CATTTCCTCCCAAGGGAATGTCATTATTATCGTTGGCACCTCTAAA<br>CGCTCTCCCTATATCCCTATACCTTCTAGGAAAGAAGCTATAC<br>CATTCC | Reverse, end of <i>wtf4<sup>Poison</sup></i> , with SfiI tail                         |
| 939         | CAAGGAATTAACCTCGTTGGTGCACAAATG                                                                                                                         | Forward, upstream of the stop codon of <i>sec63</i>                                   |
| 941         | AACCCGGGGATCCGTCGACCTTCTCCATCAGAAGTGTGAGTATC<br>CATAGGGTCATATTC                                                                                        | Reverse, downstream of the stop codon of <i>sec63</i> -YFP with<br><i>HIS3MX</i> tail |
| 943         | CACATTCAGAAAAAATGGATTAGTCATGACGCATGGTATCGAT<br>GAATTCGAGCTCG                                                                                           | Reverse, to amplify either mTur_URA3MX or YFP_ HIS3MX with<br><i>sec63</i> tail       |
| 944         | GAATATGACCCATGGATACTGACACTTCTGATGGAGAAGGTCG<br>ACGGATCCCGGGTT                                                                                          | Forward, to amplify YFP_ HIS3MX, with <i>sec63</i> tail                               |
| 945         | CGAGCTCGAATTCATCGATACCATGCGTCACTAATCCATTTT<br>TTTCTGAATGTGT                                                                                            | Forward, region downstream of the stop codon of <i>sec63</i>                          |
| 946         | ATGTAACCTTTGTAATGATAGATTCAATCAAATTCAGTTTCTC                                                                                                            | Reverse, region downstream of the stop codon of <i>sec63</i>                          |
| 963         | AAATCTCTCGAGATGCTTTTCAGAAATTTGAAATATATTAAGAACT<br>GTATCTGAGG                                                                                           | Forward, in <i>wtf4<sup>Poison</sup></i> , with XhoI tail                             |
| 964         | AAATCTGGATCCGCAAAATAAAGCCTTCGAGCGTCCCAAAACC                                                                                                            | Reverse, amplifies <i>CYC1</i> terminator, with BamHI tail                            |
| 997         | CCCAAGGGAATGTCATTATTATCGTTGGC                                                                                                                          | Reverse, in <i>wtf4</i> exon 6                                                        |
| 998         | GCCAACGATAAATAATGACATTCCTTGGG                                                                                                                          | Forward, in <i>wtf4</i> exon 6                                                        |
| 1021        | CACATTGTGCCAAGAAAATTACAGTC                                                                                                                             | Reverse, in <i>wtf4</i> exon 3                                                        |
| 1040        | AATATAGGATCCCGGGGACGAGGCAAGCTAAAC                                                                                                                      | Reverse, amplifies <i>ADH1</i> terminator, with BamHI tail                            |
| 1045        | AACAATTTACACAGGAAACAGCTATGACC                                                                                                                          | Forward, upstream of <i>GAL1/GAL10</i>                                                |
| 1065        | AAATCTCTCGAGATGAAGAATAAAGATTATCCCTTGAGTGTGTC<br>TATGG                                                                                                  | Forward, start of <i>wtf4</i> exon 1, with XhoI tail                                  |
| 1066        | AAATCTCTCGAGATGTTGAGCAAGGGCGAGGAG                                                                                                                      | Forward, at the beginning of mCherry, with XhoI tail                                  |
| 1072        | TGTATAAAGGTGACTGTAATTTCTTGGC                                                                                                                           | Forward, in <i>wtf4</i> exon 3                                                        |
| 1136        | GTTAAATTAACCAGCACCGTCACCCCTGAATATGGAGGCAATGT<br>GCTCTCATC                                                                                              | Reverse, in <i>wtf4</i> exon 1, with a tail of linker sequence                        |
| 1137        | GATGAGAGCACATTGCCTCCATATTCAGGGTGACGGTGTGTT<br>TAATTAAC                                                                                                 | Forward, in linker sequence, with a tail of <i>wtf4</i> exon 1 sequence               |
| 1195        | TATATGGTACCGCCCATCCAGTGTAAAC                                                                                                                           | Forward, in LexA promoter, with KpnI tail                                             |
| 1240        | TATATCTCGAGTATCGAATTCCTGCAGCCG                                                                                                                         | Reverse, in LexA promoter, with XhoI tail                                             |
| 1280        | CCCTCCAAATGCATTTCTATCCCTCCAAATGCATTTCCCTATAC<br>CTTCTAGGAAAAGAGC                                                                                       | Reverse, in <i>wtf4</i> exon 6, has extra repeat sequence                             |
| 1281        | ATTTGGAGGGATAGGAAATGCATTTGGAGGGATAGGAAATGCAA<br>TTGGGGGATAGGGAG                                                                                        | Forward, in <i>wtf4</i> exon 6, has extra repeat sequence                             |
| 1326        | AAATCTGGATCCATGGTGTGAGCAAGGGCGAGGAG                                                                                                                    | Forward, at the beginning of mCherry, with BamHI tail                                 |
| 1339        | ATGCTAAAGGTGAAGAATTACTCTGG                                                                                                                             | Forward, start of eGFP                                                                |
| 1398        | CTCGGCCCATGGTAAGTAGCTAACCCGGGAGCGCTGACGTCA<br>GACTTAATAGGT                                                                                             | Forward, in <i>CYC1</i> terminator, with a tail of mCherry sequence                   |
| 1399        | TTAGTACTTACCATGGGGCCGAGGGCCCTTACTTGTACAGCT<br>CGTCCATGCCCGGGTGG                                                                                        | Reverse, in mCherry, with a tail of <i>CYC1</i> terminator sequence                   |
| 1400        | AAGCGAAGTCGGTGGAGGGCGGTGGATGTTGAGCAAGGGCGAG<br>GAGGATAA                                                                                                | Forward, in mCherry, with a tail of linker- <i>wtf4</i> exon 6 sequence               |



2532

| oligos used |                                                                                                 |                                                                                                                                                |
|-------------|-------------------------------------------------------------------------------------------------|------------------------------------------------------------------------------------------------------------------------------------------------|
| oligo       | sequence                                                                                        | description                                                                                                                                    |
| 1401        | TTATCCTCCTCGCCCTTGCTCACCATCCCACGCTCCACCG<br>ACTTCGCTT                                           | Reverse, in linker- <i>wtf4</i> exon 6, with a tail of mCherry sequence                                                                        |
| 1402        | AAATCTCTCGAGATGAAGAATAAAGATTATCCCTTGAGGTCG                                                      | Forward, start of <i>wtf4</i> exon 1, with XhoI tail                                                                                           |
| 1419        | AAATCTCTCGAGATGCTTTCTGAAATCTGGAAGTACATC                                                         | Forward, in <i>wtf4</i> intron 1-exon 2 ( <i>wtf4</i> <sup>Poison</sup> start site), with XhoI tail                                            |
| 1465        | AAATCTGGATCCATGAAGAACAAGGACTACCCCTTGAGATCT                                                      | Forward, start of <i>wtf4</i> exon 1, with BamHI tail, codon optimized for <i>S. cerevisiae</i>                                                |
| 1466        | AAATCTGGATCCATGCTTTCTGAAATCTGGAAGTACATC                                                         | Forward, in <i>wtf4</i> intron 1-exon 2 ( <i>wtf4</i> <sup>Poison</sup> start site), with BamHI tail, codon optimized for <i>S. cerevisiae</i> |
| 1712        | CGTCGCTTTGCCATCAAGAGACAACATA                                                                    | Forward, upstream of <i>VPS1</i>                                                                                                               |
| 1713        | GGACAAAAGATACTAGGATCGTAATGCGAG                                                                  | Reverse, downstream of <i>VPS1</i>                                                                                                             |
| 1734        | AATATAGGAGCTCACAGATCTGCCATAAATTATATTG                                                           | Forward, start of Z3ez promoter, with SacI tail                                                                                                |
| 1735        | TCAAGGATAATCTTTATTCTTCATGACGTAAAGTATAGAGG<br>TA                                                 | Reverse, in Z3ez promoter, with tail of <i>wtf4</i> exon 1 sequence                                                                            |
| 1738        | TACCTTATACTTTAACGTCATGAAGAATAAAGATTATCCCTT<br>GA                                                | Forward, in <i>wtf4</i> exon 1, with tail of Z3ez promoter sequence                                                                            |
| 1750        | GCGGCATGGACGAGCTGTACAAGTAAGGCGCCACTTCTA<br>AATA                                                 | Forward in downstream of <i>wtf4</i> , with a tail of mCherry sequence                                                                         |
| 1751        | TATTTAGAAGTGGCGCGCCTTACTTGTACAGCTCGTCCATGCC<br>GC                                               | Reverse, in mCherry, with tail of downstream of <i>wtf4</i> sequence                                                                           |
| 1831        | GGCAACCAGAACCGCTACGGTGGAGGCGGTGGGATGGTTAG<br>TAAAGGAGAAAGAAATTGATC                              | Forward in mCardinal, with a tail of linker- <i>RNQ1</i> sequence                                                                              |
| 1832        | GATCAATTCTTCTCCTTTACTAACCATCCCACGCTCCACC<br>GTAGCGGTTCTGGTTGCC                                  | Reverse, in <i>RNQ1</i> -linker, with tail of mCardinal sequence                                                                               |
| 1833        | TAAATTACTATACTTCTACTACTAGTCCCGGGCTGCAGGAATTC<br>GATACTCGAGATGGATACGGATAAGTTAATCTCAGAGGCTGA<br>G | Forward, in <i>RNQ1</i> with a tail of LexA promoter sequence                                                                                  |
| 1834        | CTCAGCCTCTGAGATTAACCTTATCCGTATCCATCTCAGATATC<br>GAATTCCTCGAGCCCGGACTAGTATAGAAGTATAGTAATTT<br>A  | Reverse, in LexA promoter, with a tail of <i>RNQ1</i> sequence                                                                                 |
| 1835        | AAATCTGGATCCGCCCATCCAGTGTAAACGAAC                                                               | Forward, in LexA promoter, with BamHI tail                                                                                                     |
| 1850        | TAATTCATCTATTTACTCCTAAAAAAGAAAT                                                                 | Forward, upstream of <i>VPS1</i>                                                                                                               |
| 1851        | AGCTTCCACGTATACAAGAACAATATAAGA                                                                  | Reverse, downstream of <i>VPS1</i>                                                                                                             |
| 1915        | GTCAATTTACCGTAAGTAGCATCAC                                                                       | Reverse, in eGFP                                                                                                                               |
| 1929        | AAATCTGGATCCCGGATTAGAAGCCGCCGAGCGGGCG                                                           | Forward in <i>GAL1/GAL10</i> promoter, with BamHI tail                                                                                         |
| 2037        | GGGAAACCAGTTCGTGTAGAACTTTCTGCTG                                                                 | Forward, upstream of <i>sec63</i>                                                                                                              |
| 2038        | CACCAAACAATCGAGAATGAAACATTGGGC                                                                  | Reverse, downstream of <i>sec63</i>                                                                                                            |
| 2068        | TACAGTTTTAATATANTTTCCAAATTTCTGAAAGCATGACGTT<br>AAAGTATAGAGGTATATTAACAATTTTTTTGT                 | Reverse, in LexA promoter sequence, with a tail of <i>wtf4</i> intron 1-exon 2 sequence                                                        |
| 2069        | ACAAAAAATGTTAATATACCTCTACTTTAACGTCATGCTT<br>TCAGAAATTTGGAAANTATATTAACACTGTA                     | Forward, in <i>wtf4</i> intron 1-exon 2 (alternate start site), with a tail of LexA promoter sequence                                          |
| rh1282      | TCTGAAATCTGGAAGTACATCAAGAC                                                                      | To insert exon 1 into <i>wtf4</i> <sup>Poison</sup> with Gibson Assembly                                                                       |
| rh1283      | CTTAGACATTTTACTAGTTCTAGAATCCG                                                                   | To insert exon 1 into <i>wtf4</i> <sup>Poison</sup> with Gibson Assembly                                                                       |
